# Supplementary material for: Pan-cancer analysis of a novel indicator of necroptosis with its application in human cancer
Source: Aging (Albany NY). 2022 Sep 26;14(18):7587–616. doi: 10.18632/aging.204307 (PMC9550240; doi:10.18632/aging.204307)
Supplement: Supplementary Figures [file aging-14-204307-s001.pdf]

SUPPLEMENTARY FIGURES

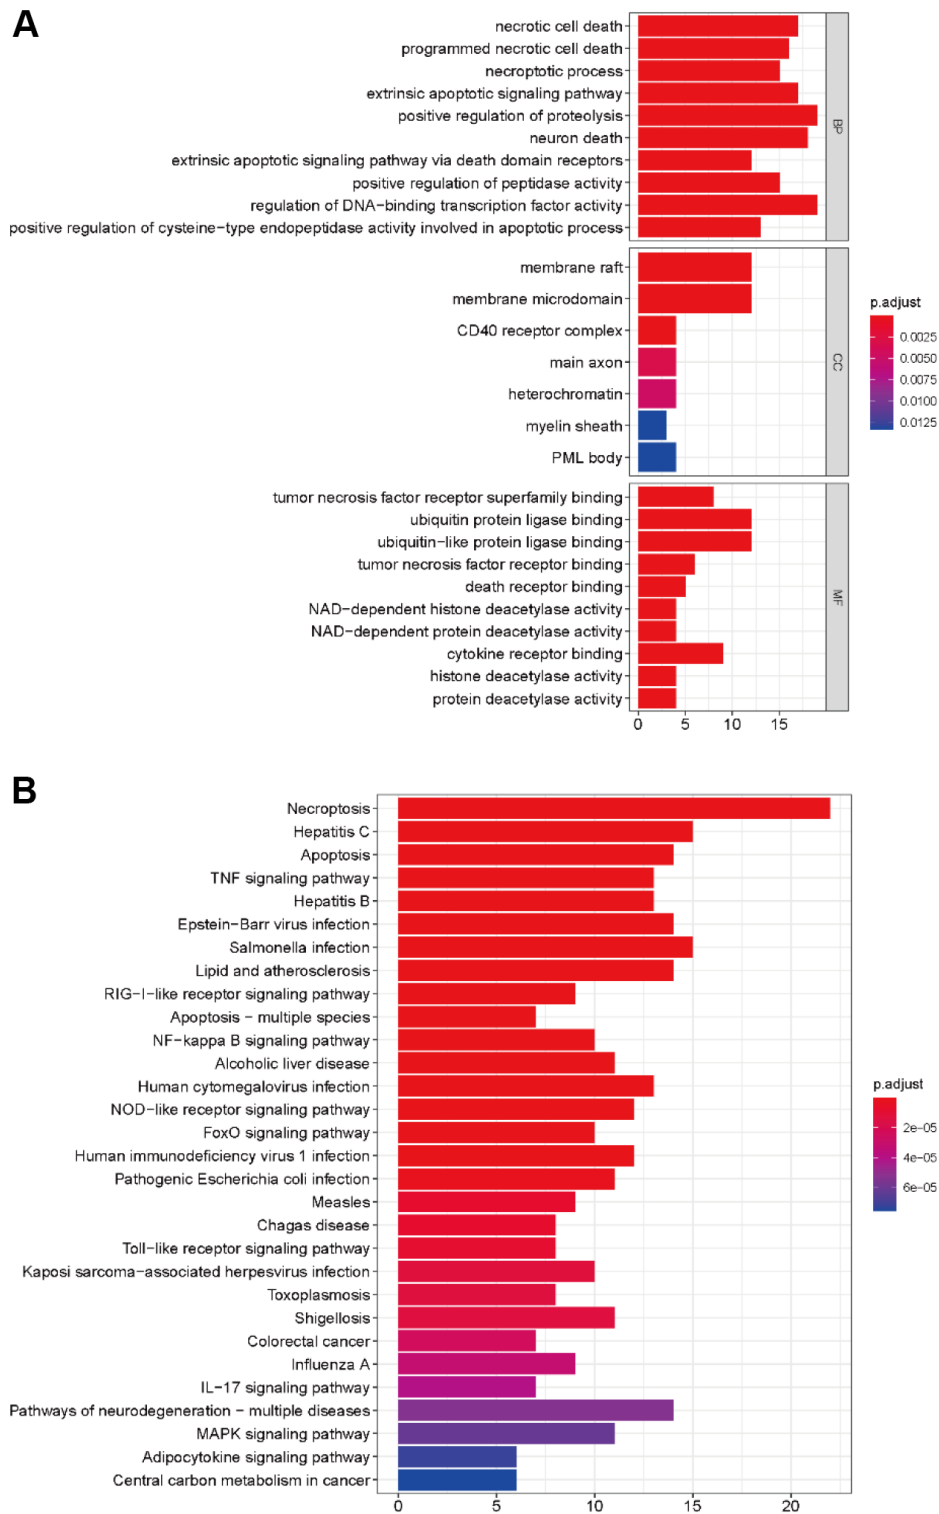

**Supplementary Figure 1. Functional and pathways enrichment of necroptosis regulators. (A) GO enrichment. (B) KEGG pathways enrichment.**



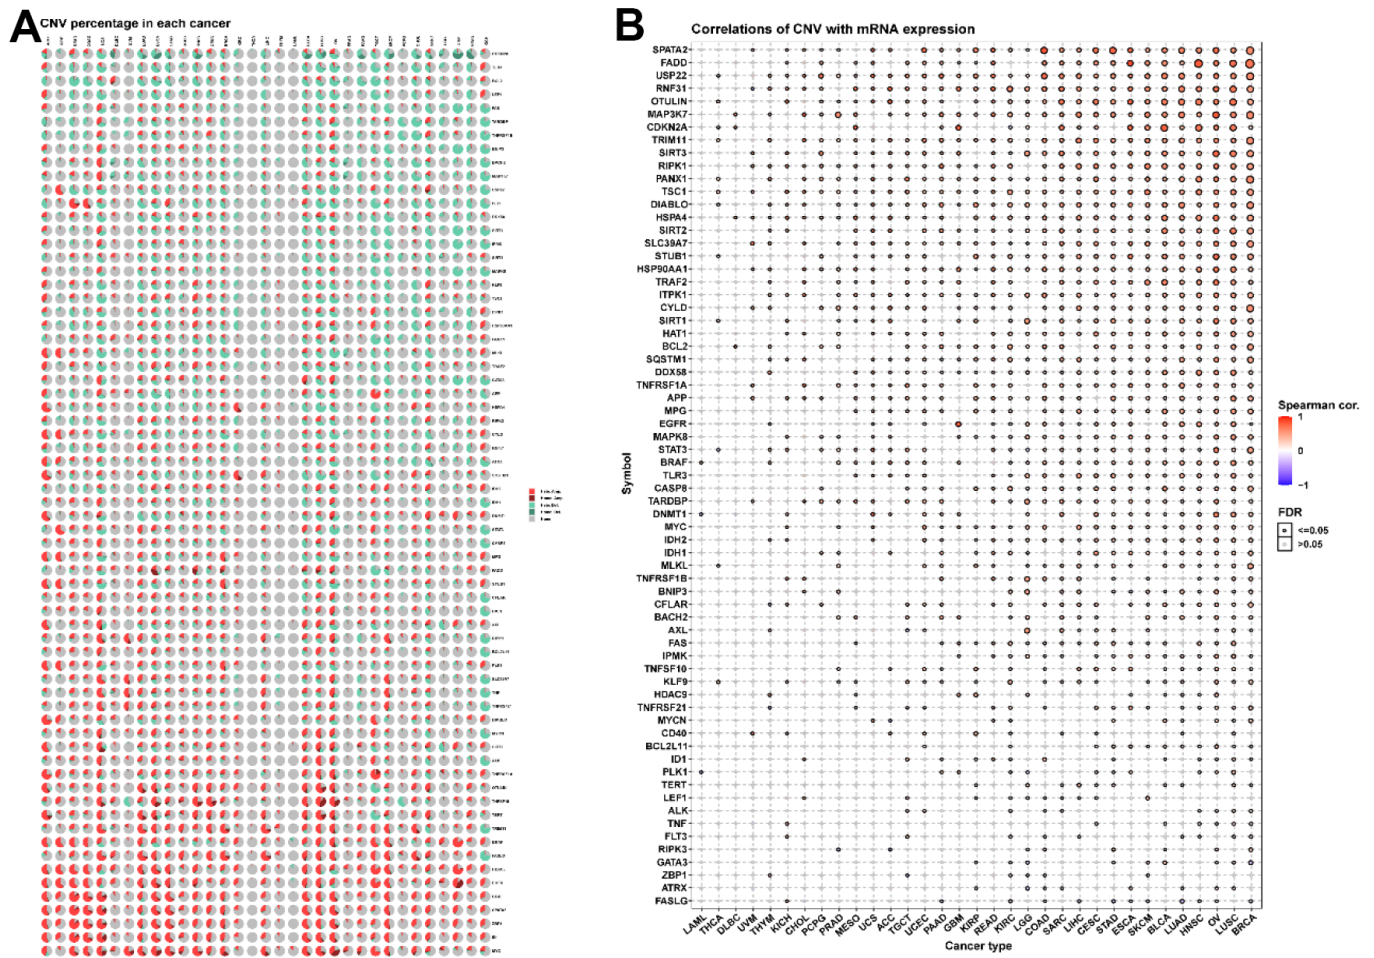

**Supplementary Figure 3. Copy number variations of necroptosis in pan-cancer. (A)** copy number variation percentage of necroptosis in each cancer. **(B)** Correlations of copy number with mRNA expression.

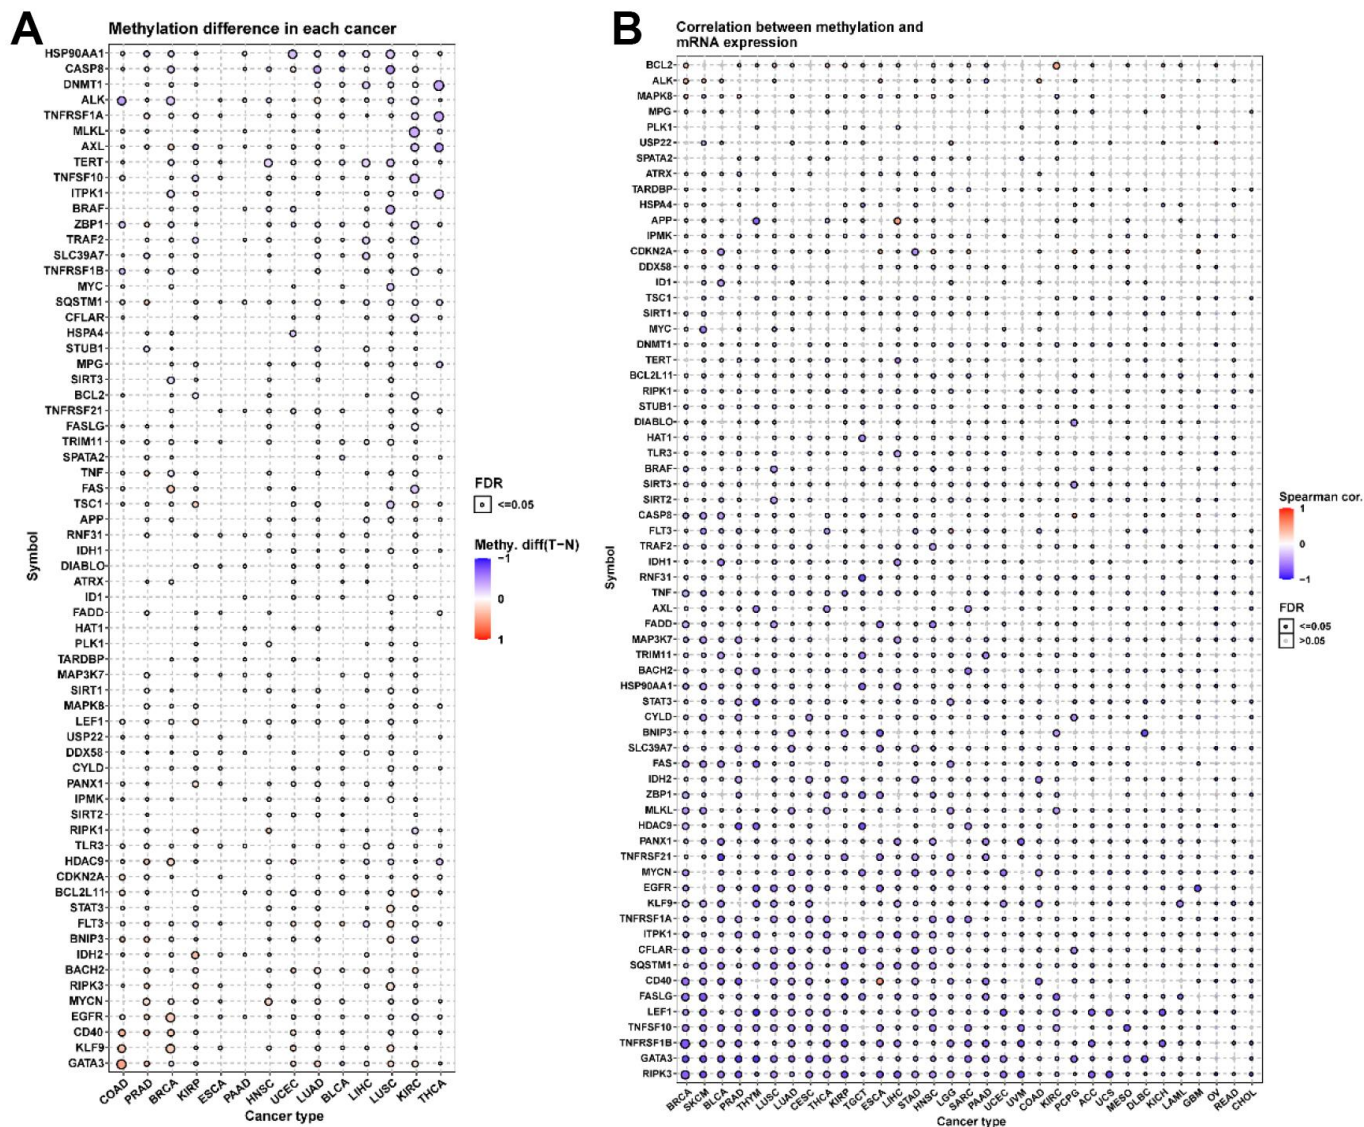

**Supplementary Figure 4. Methylation profiling of necroptosis regulators in cancers.** (A) Methylations difference in each cancer. (B) Correlations between methylation and mRNA expression. Pan-cancer using univariate cox regression (left) and log-rank method (Right).

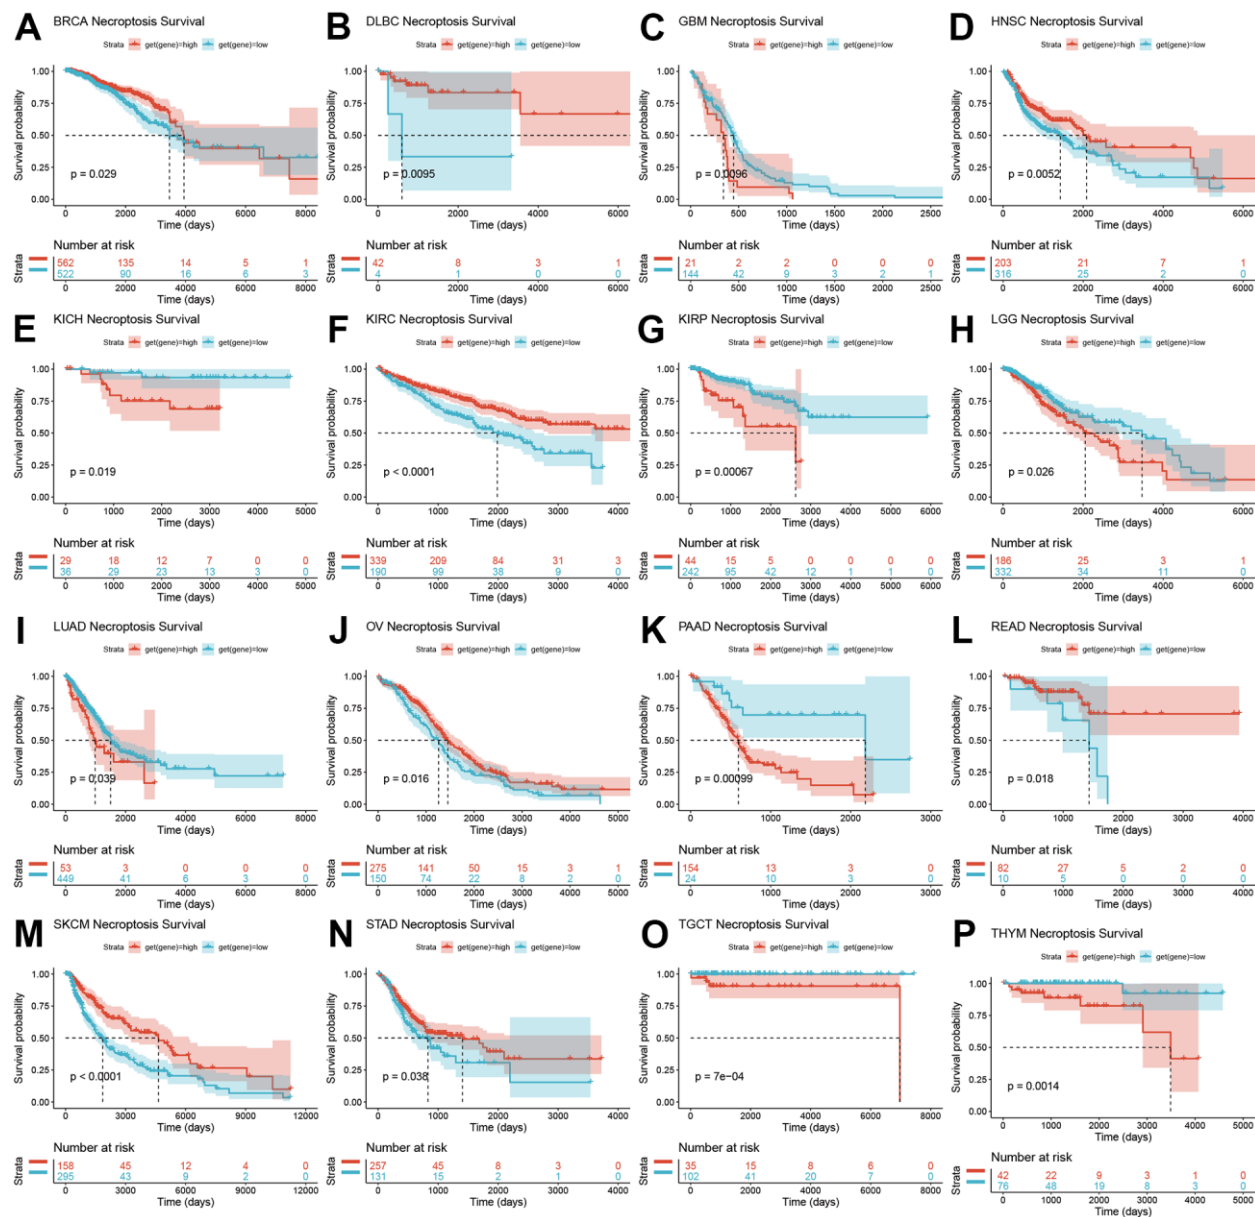

**Supplementary Figure 5. Associations between NPS and disease-specific survival in pan-cancer using log-rank method.** (A) BRCA. (B) GBM. (C) HNSC. (D) KICH. (E) KIRC. (F) KIRP. (G) LGG. (H) LUSC. (I) MESO. (J) OV. (K) PAAD. (L) SKCM. (M) STAD. (N) TGCT. (O) THYM (P) UCEC.

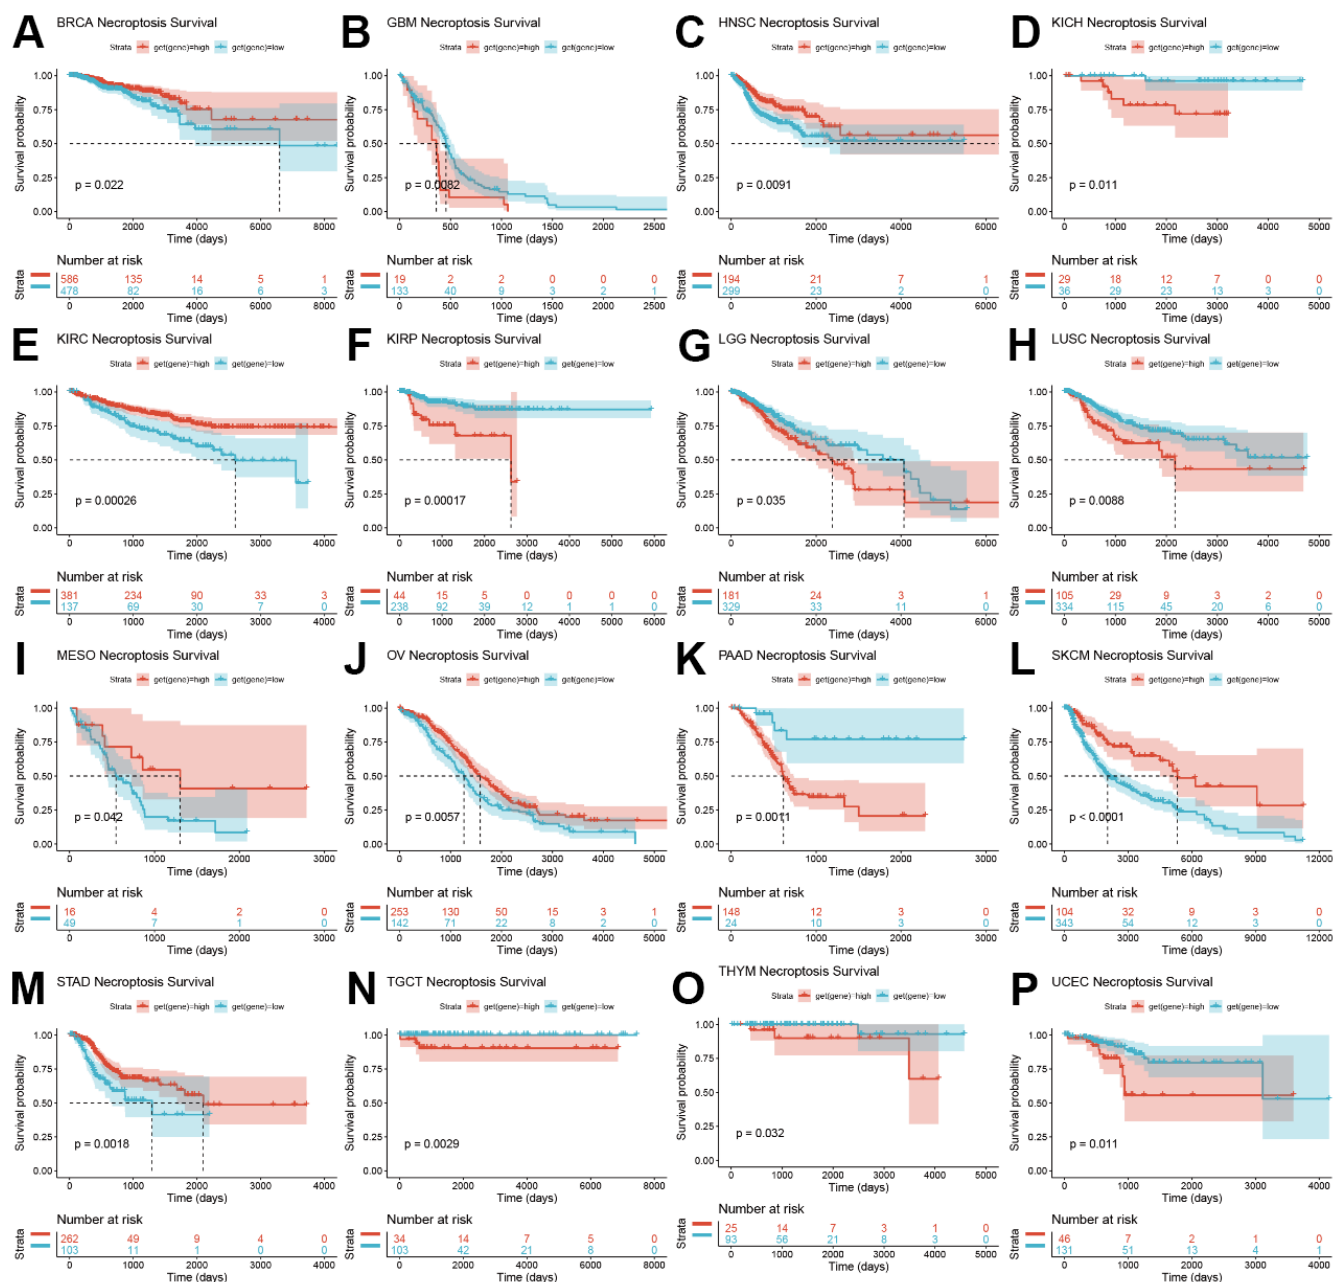

**Supplementary Figure 6. Associations between NPS and DSS using Kaplan-Meier method in cancers. (A) BRCA. (B) GBM. (C) HNSC. (D) KICH. (E) KIRC. (F) KIRP. (G) LGG. (H) LUSC. (I) MESO. (J) OV. (K) PAAD. (L) SKCM. (M) STAD. (N) TGCT. (O) THYM. (P) UCEC.**

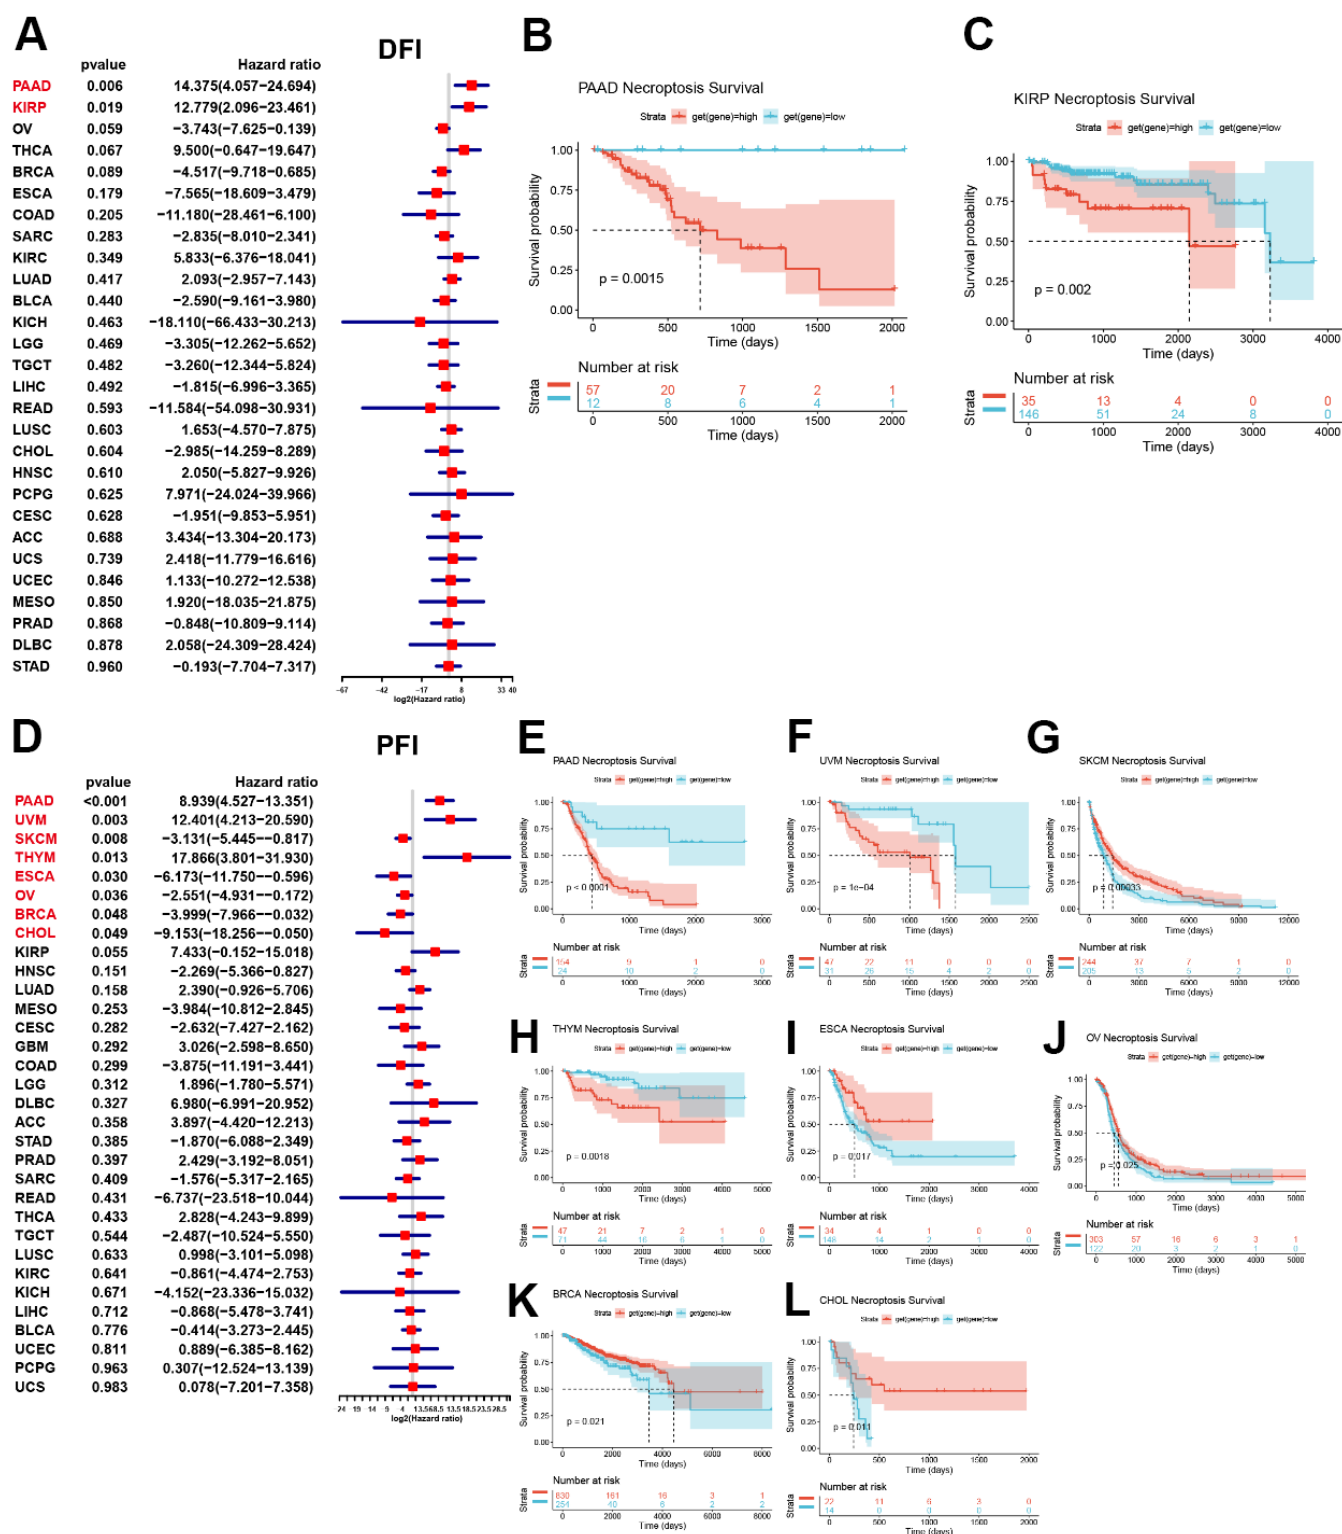

**Supplementary Figure 7. Associations between NPS and DFI and PFI in pan-cancer using log-rank method.** (A) Forest showed the association between NPS and DFI using univariate cox regression. (B) PAAD. (C) KIRP. (D) Forest plot showed the association between NPS and PFI using univariate cox regression. (E) PAAD. (F) UVM. (G) SKCM. (H) THYM. (I) ESCA. (J) OV. (K) BRCA. (L) CHOL.

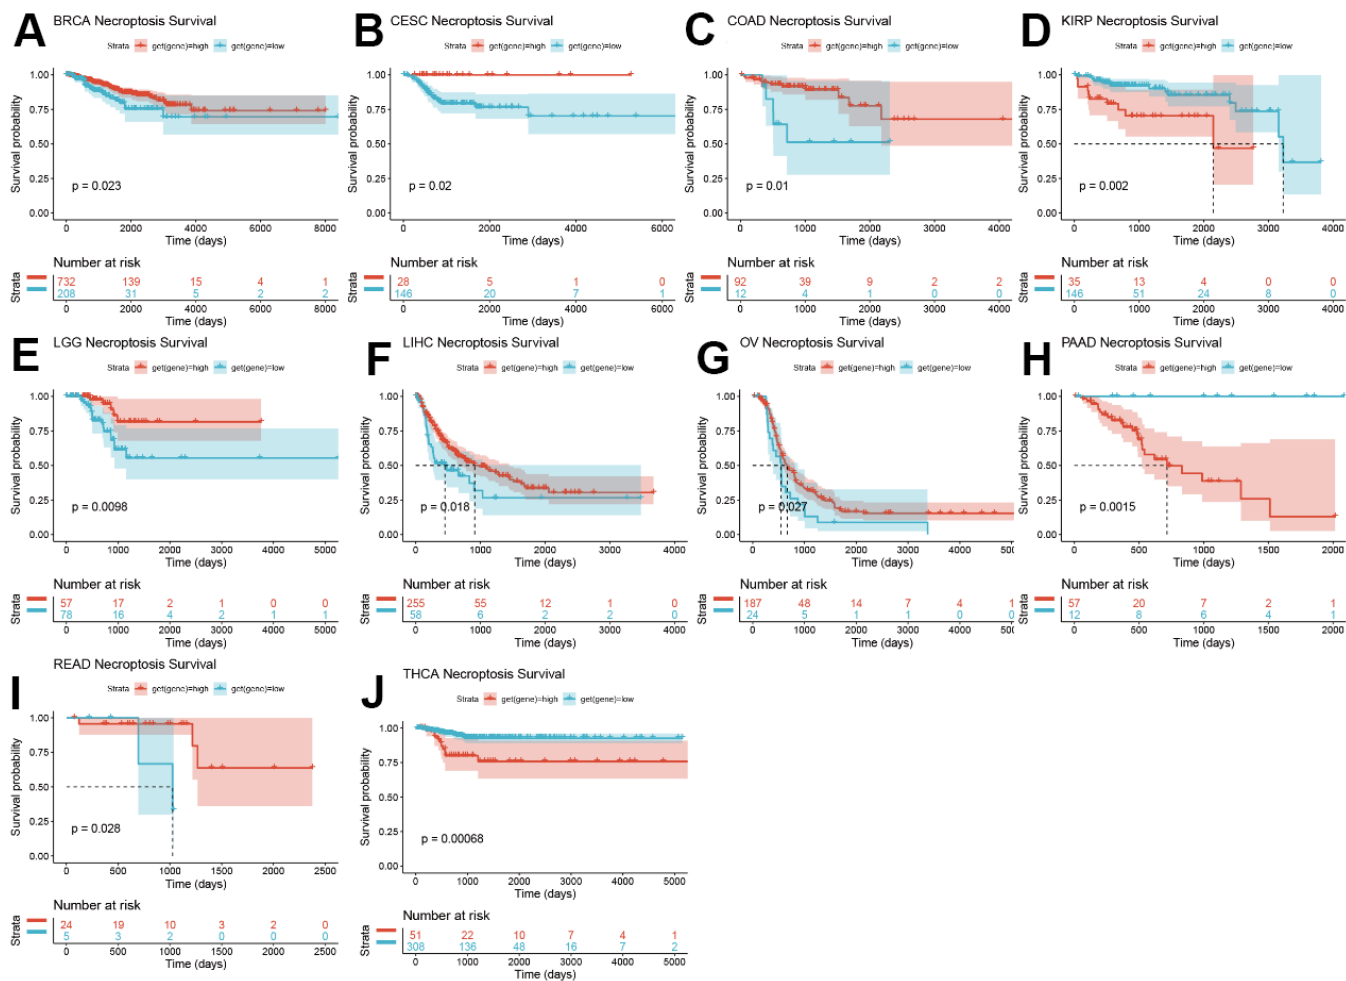

**Supplementary Figure 8. Associations between NPS and disease-free interval in pan-cancer using log-rank method. (A) BRCA. (B) CESC. (C) COAD. (D) KIRP. (E) LGG. (F) LIHC. (G) OV. (H) PAAD. (I) READ. (J) THCA.**

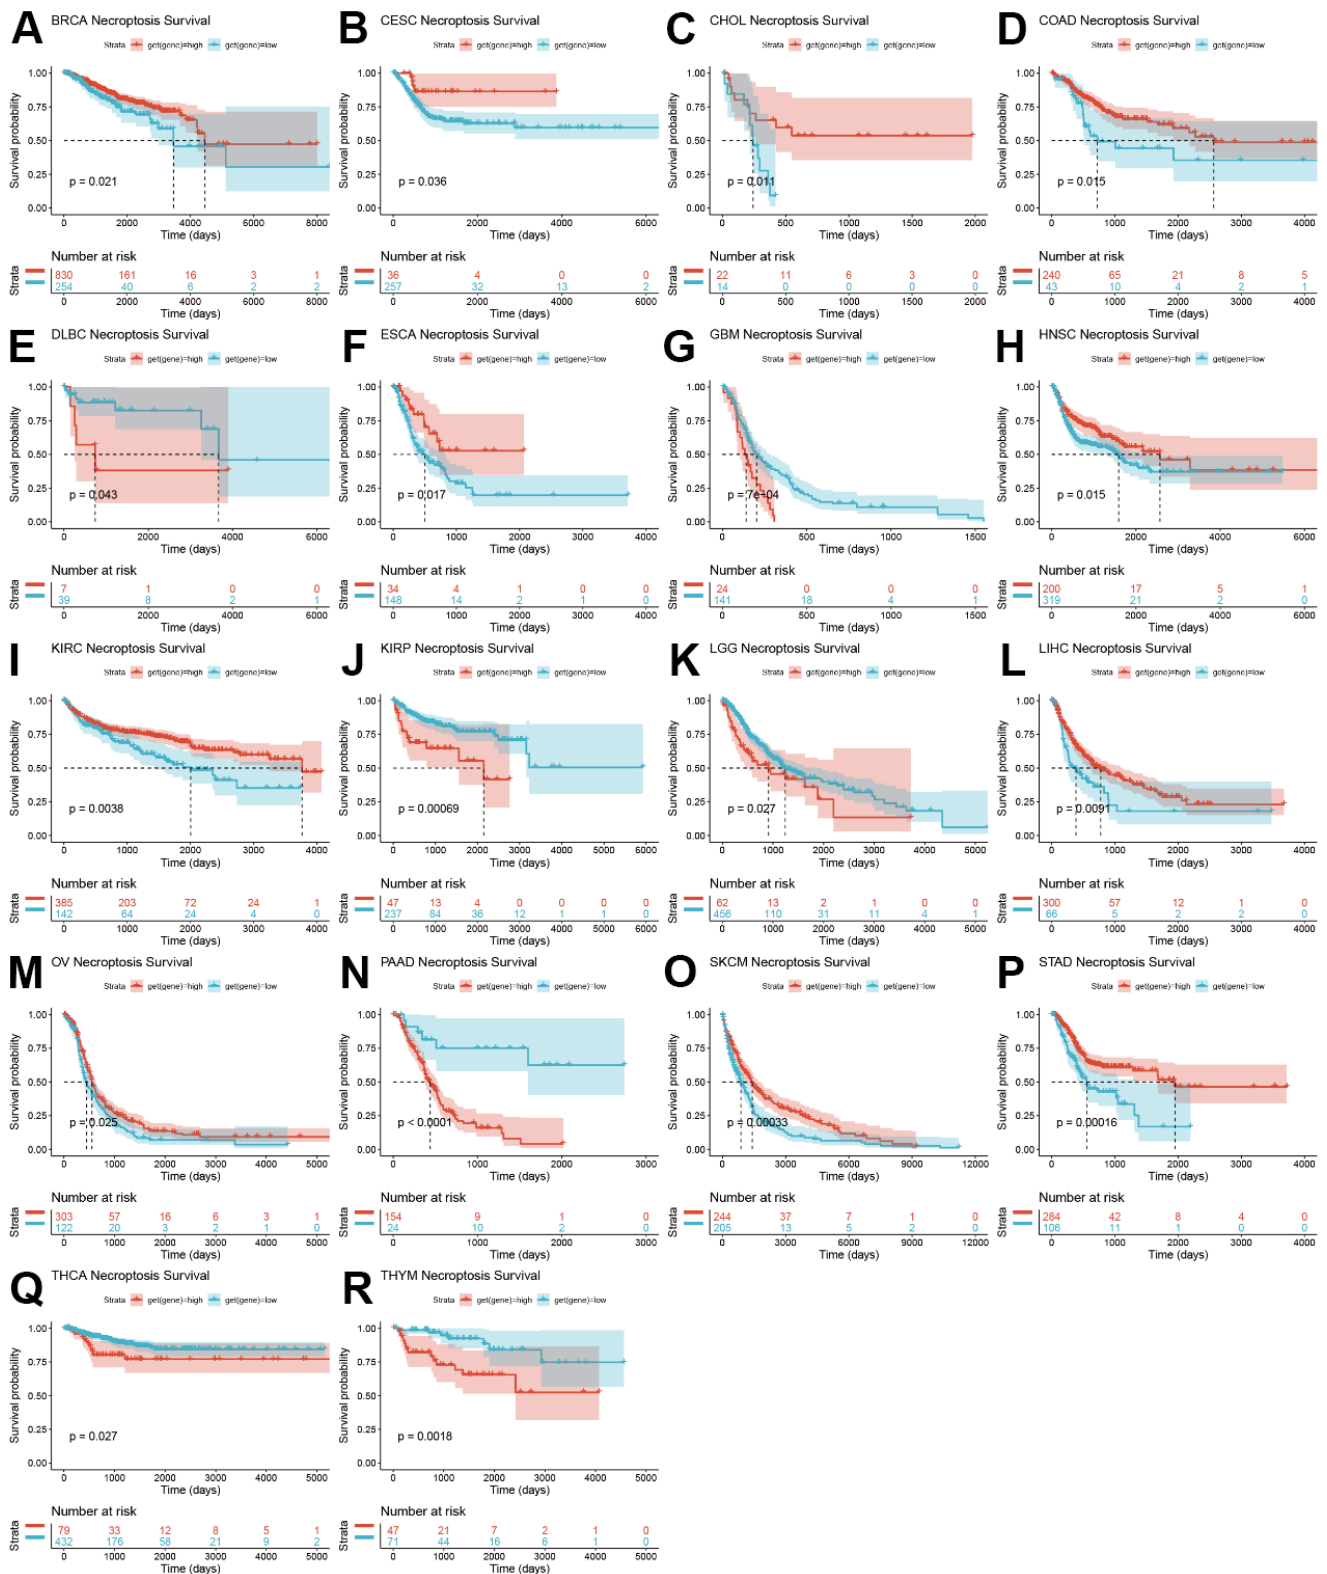

**Supplementary Figure 9. Associations between NPS and progression-free survival in pan-cancer using log-rank method. (A) BRCA. (B) CESC. (C) CHOL. (D) COAD. (E) DLBC. (F) ESCA. (G) GBM. (H) HNSC. (I) KIRC. (J) KIRP (K) LGG. (L) LIHC. (M) OV. (N) PAAD. (O) SKCM. (P) STAD. (Q) THCA. (R) THYM.**

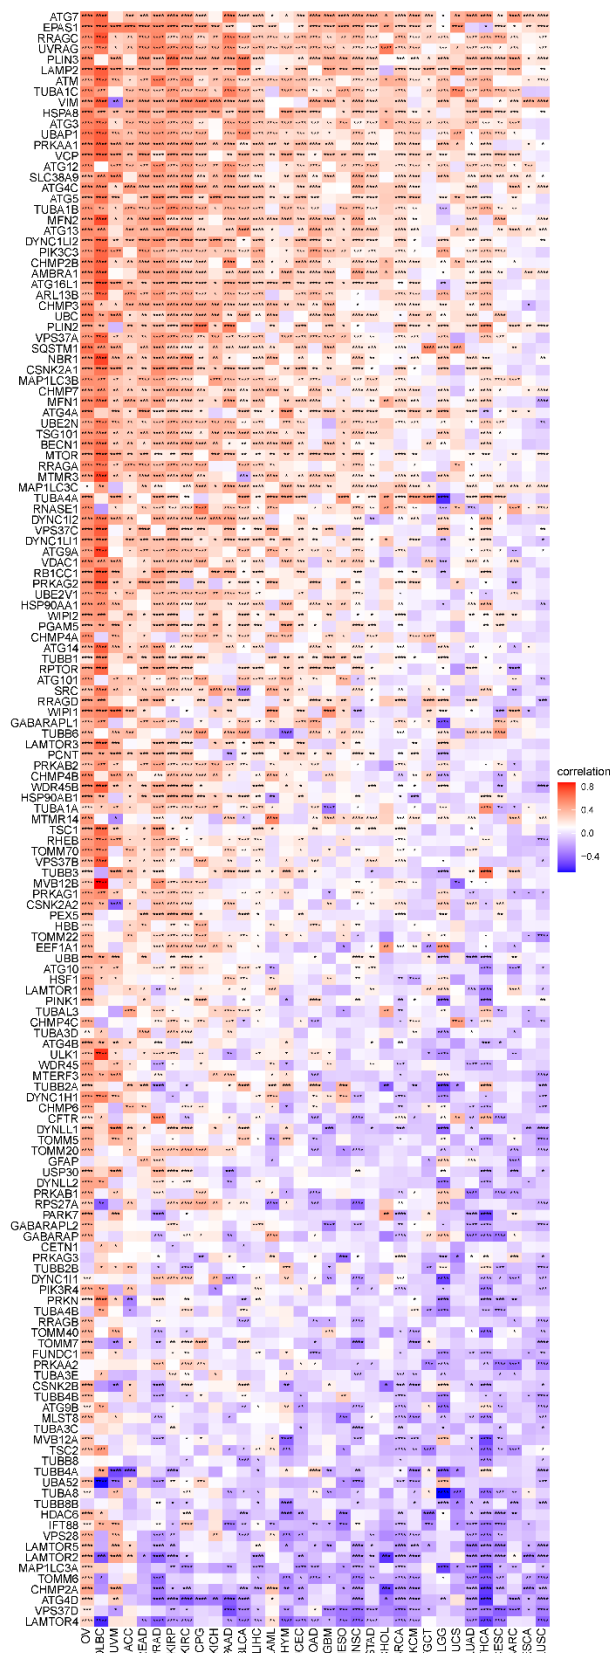

Supplementary Figure 10. Correlations of NPS with autophagy regulators.

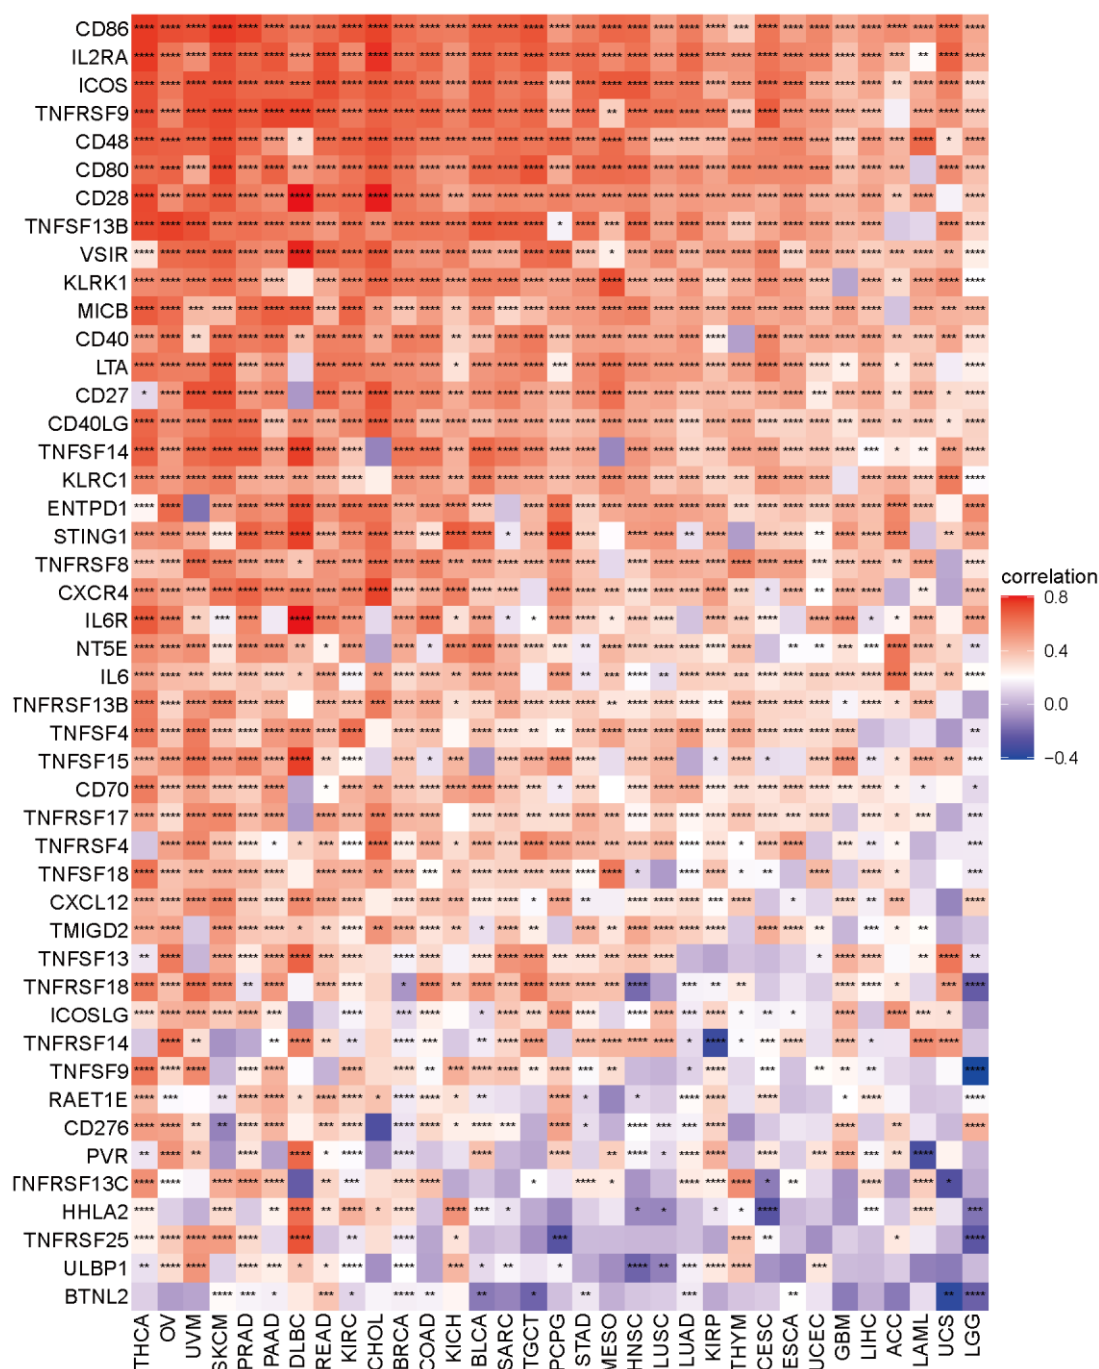

Supplementary Figure 11. Correlations of NPS and immune regulations genes.
