# Supplementary material for: Pan-cancer analysis of a novel indicator of necroptosis with its application in human cancer
Source: Aging (Albany NY). 2022 Sep 26;14(18):7587–616. doi: 10.18632/aging.204307 (PMC9550240; doi:10.18632/aging.204307)
Supplement: Supplementary Table 3 [file aging-14-204307-s003.xlsx]

## Sheet: Table S3
Supplementary Table 3. Correlation of CTRP IC50 and necroptosis regulators in pan-cancers.
symbol	drug	cor	fdr	entrez
ALK	16-beta-bromoandrosterone	-0.0122672	0.833737	238
ALK	1S,3R-RSL-3	-0.089395	0.0265472	238
ALK	3-Cl-AHPC	-0.0987814	0.0109587	238
ALK	968	0.0368594	0.99209	238
ALK	A-804598	0.0033286	0.98761	238
ALK	AA-COCF3	-0.0653449	0.123492	238
ALK	ABT-199	-0.0864629	0.119628	238
ALK	ABT-737	-0.0947995	0.0300372	238
ALK	AC55649	-0.0322093	0.814452	238
ALK	AGK-2	0.0221276	0.960072	238
ALK	AM-580	-0.0407381	0.462379	238
ALK	AT-406	-0.00688854	0.962774	238
ALK	AT13387	-0.0782355	0.193888	238
ALK	AT7867	-0.0511479	0.235918	238
ALK	AZ-3146	-0.0183072	0.70144	238
ALK	AZD1480	-0.0273417	0.744925	238
ALK	AZD4547	-0.0558004	0.246191	238
ALK	AZD6482	-0.101889	0.0438466	238
ALK	AZD7545	-0.0920987	0.0297217	238
ALK	AZD7762	-0.0475575	0.24025	238
ALK	AZD8055	-0.091358	0.0227341	238
ALK	B02	-0.0547226	0.191471	238
ALK	BCL-LZH-4	0.0297484	0.907203	238
ALK	BEC	-0.00126832	0.999979	238
ALK	BI-2536	-0.0853988	0.0237151	238
ALK	BIBR-1532	-0.0888164	0.0459742	238
ALK	BIRB-796	0.00359549	0.950533	238
ALK	BIX-01294	-0.123783	0.00136862	238
ALK	BMS-195614	-0.0654304	0.272171	238
ALK	BMS-270394	-0.119743	0.00535349	238
ALK	BMS-345541	-0.10635	0.00662503	238
ALK	BMS-536924	-0.0474531	0.391322	238
ALK	BMS-754807	-0.0895567	0.0401741	238
ALK	BRD-A02303741	-0.0616626	0.251717	238
ALK	BRD-A05715709	0.0997829	0.491889	238
ALK	BRD-A71883111	-0.0234103	0.633402	238
ALK	BRD-A86708339	-0.0391087	0.546809	238
ALK	BRD-A94377914	-0.082224	0.154831	238
ALK	BRD-K01737880	-0.20943	0.262257	238
ALK	BRD-K02251932	-0.00585831	0.9304	238
ALK	BRD-K02492147	-0.0108025	0.881626	238
ALK	BRD-K04800985	-0.00107984	0.999785	238
ALK	BRD-K09344309	-0.0218551	0.98204	238
ALK	BRD-K09587429	0.0522925	0.421516	238
ALK	BRD-K11533227	-0.0831969	0.0557785	238
ALK	BRD-K13999467	-0.00521075	0.922569	238
ALK	BRD-K14844214	0.031305	0.701036	238
ALK	BRD-K16147474	-0.0349213	0.927109	238
ALK	BRD-K17060750	0.019715	0.737969	238
ALK	BRD-K19103580	0.0123214	0.839819	238
ALK	BRD-K24690302	-0.0756495	0.0764337	238
ALK	BRD-K26531177	-0.0680334	0.106139	238
ALK	BRD-K27224038	0.0545841	0.846372	238
ALK	BRD-K27986637	0.0611375	0.720634	238
ALK	BRD-K28456706	-0.0761685	0.0697153	238
ALK	BRD-K29086754	-0.0825536	0.685798	238
ALK	BRD-K29313308	-0.0800983	0.0597675	238
ALK	BRD-K30019337	-0.0491471	0.883473	238
ALK	BRD-K30748066	-0.303235	0.0647432	238
ALK	BRD-K33199242	0.024823	0.969641	238
ALK	BRD-K33514849	-0.0328644	0.999288	238
ALK	BRD-K34099515	-0.0798725	0.903905	238
ALK	BRD-K34222889	-0.146262	0.000108138	238
ALK	BRD-K34485477	0.0615535	0.998562	238
ALK	BRD-K35604418	-0.127093	0.00115633	238
ALK	BRD-K37390332	-0.00806996	0.987995	238
ALK	BRD-K41334119	0.0291848	0.969543	238
ALK	BRD-K41597374	-0.0386556	0.368665	238
ALK	BRD-K42260513	0.0914048	0.973398	238
ALK	BRD-K44224150	-0.0625569	0.98849	238
ALK	BRD-K45681478	-0.0726776	0.103545	238
ALK	BRD-K48334597	-0.0243851	0.87108	238
ALK	BRD-K48477130	0.00776752	0.976211	238
ALK	BRD-K49290616	-0.00509304	0.995761	238
ALK	BRD-K50799972	0.00711391	0.943953	238
ALK	BRD-K51490254	-0.0670606	0.118	238
ALK	BRD-K51831558	-0.116679	0.0879312	238
ALK	BRD-K52037352	-0.00175566	0.984087	238
ALK	BRD-K55116708	-0.0328813	0.507596	238
ALK	BRD-K61166597	-0.149457	0.000145028	238
ALK	BRD-K63431240	0.0245285	0.611167	238
ALK	BRD-K64610608	0.0405035	0.735118	238
ALK	BRD-K66453893	-0.121397	0.00143947	238
ALK	BRD-K66532283	-0.114183	0.0043118	238
ALK	BRD-K70511574	-0.0815183	0.0362996	238
ALK	BRD-K71781559	-0.00953658	0.996572	238
ALK	BRD-K75293299	0.0367246	0.902553	238
ALK	BRD-K78574327	-0.00979492	0.993429	238
ALK	BRD-K80183349	-0.101993	0.0097303	238
ALK	BRD-K84807411	0.0541236	0.857924	238
ALK	BRD-K85133207	-0.10555	0.0136414	238
ALK	BRD-K86535717	-0.00384925	0.99366	238
ALK	BRD-K88742110	-0.069014	0.103257	238
ALK	BRD-K90370028	-0.0129188	0.980391	238
ALK	BRD-K92856060	-0.183271	3.75941e-06	238
ALK	BRD-K96431673	-0.00476537	0.999232	238
ALK	BRD-K96970199	0.0151652	0.998764	238
ALK	BRD-K97651142	-0.118463	0.00375479	238
ALK	BRD-K99006945	-0.0319067	0.690495	238
ALK	BRD-M00053801	0.00935167	0.948505	238
ALK	BRD1378	0.0207848	0.88099	238
ALK	BRD1812	-0.10823	0.00665711	238
ALK	BRD1835	-0.0335771	0.516788	238
ALK	BRD4132	0.00984456	0.907351	238
ALK	BRD5468	0.00138399	0.993307	238
ALK	BRD6340	-0.120367	0.00223777	238
ALK	BRD8899	0.0284123	0.817207	238
ALK	BRD8958	-0.0223983	0.982399	238
ALK	BRD9647	-0.0371976	0.499536	238
ALK	BRD9876	-0.0375803	0.566004	238
ALK	BYL-719	-0.0375417	0.621516	238
ALK	Bax channel blocker	-0.0668127	0.140212	238
ALK	C6-ceramide	0.0366062	0.756087	238
ALK	CAL-101	-0.0506698	0.406521	238
ALK	CAY10576	0.0168162	0.854975	238
ALK	CAY10594	-0.0937429	0.0845133	238
ALK	CAY10618	-0.0706211	0.0819519	238
ALK	CBB-1007	-0.0119209	0.962816	238
ALK	CCT036477	-0.133531	0.000544385	238
ALK	CD-1530	-0.0222634	0.73018	238
ALK	CD-437	-0.124746	0.0011121	238
ALK	CHIR-99021	-0.0448445	0.31554	238
ALK	CHM-1	-0.0993515	0.00916852	238
ALK	CI-976	-0.0273923	0.871616	238
ALK	CID-5951923	-0.0279989	0.773928	238
ALK	CIL41	-0.115411	0.0832612	238
ALK	CIL55	0.0313196	0.901705	238
ALK	CIL55A	-0.0815113	0.185258	238
ALK	CIL56	-0.13035	0.027633	238
ALK	CIL70	-0.140476	0.0124619	238
ALK	COL-3	-0.0987241	0.0320305	238
ALK	CR-1-31B	-0.133661	0.000335707	238
ALK	Ch-55	-0.0528606	0.287284	238
ALK	Compound 1541A	-0.0479345	0.454345	238
ALK	Compound 23 citrate	-0.0675122	0.0933825	238
ALK	Compound 7d-cis	-0.122539	0.00395698	238
ALK	DBeQ	-0.0606896	0.16999	238
ALK	DNMDP	-0.0570213	0.413945	238
ALK	ELCPK	-0.038328	0.568425	238
ALK	ETP-46464	-0.107539	0.037351	238
ALK	EX-527	-0.0308231	0.819577	238
ALK	FGIN-1-27	-0.00280871	0.987648	238
ALK	FQI-1	-0.0784691	0.171611	238
ALK	FQI-2	-0.103198	0.00664653	238
ALK	FSC231	0.0555588	0.99945	238
ALK	GANT-61	-0.0129832	0.865397	238
ALK	GDC-0879	-0.0609596	0.252948	238
ALK	GDC-0941	-0.0770911	0.0823954	238
ALK	GMX-1778	-0.0554059	0.194492	238
ALK	GSK-3 inhibitor IX	-0.0157668	0.748097	238
ALK	GSK-J4	-0.31947	0.02954	238
ALK	GSK1059615	-0.011743	0.977627	238
ALK	GSK2636771	-0.0502872	0.609746	238
ALK	GSK4112	-0.0117814	0.849702	238
ALK	GSK461364	-0.0632692	0.107864	238
ALK	GSK525762A	-0.131204	0.00050696	238
ALK	GW-405833	-0.0588418	0.140198	238
ALK	GW-843682X	-0.0851158	0.0387833	238
ALK	HBX-41108	-0.0595703	0.299759	238
ALK	HC-067047	0.0626941	0.290441	238
ALK	HLI 373	-0.0184226	0.696846	238
ALK	I-BET151	-0.132481	0.000397222	238
ALK	IC-87114	0.0149736	0.866785	238
ALK	IPR-456	0.0239305	0.893814	238
ALK	ISOX	-0.105103	0.00640423	238
ALK	IU1	-0.0552782	0.532271	238
ALK	JQ-1	-0.0966945	0.0114161	238
ALK	JW-480	-0.00468824	0.987244	238
ALK	JW-55	0.110585	0.374842	238
ALK	JW-74	-0.00116509	0.992403	238
ALK	KH-CB19	-0.0492482	0.656106	238
ALK	KHS101	-0.0966981	0.0212313	238
ALK	KPT185	-0.111642	0.0140328	238
ALK	KU 0060648	-0.061461	0.14052	238
ALK	KU-0063794	-0.109689	0.00647591	238
ALK	KU-55933	-0.0347716	0.456315	238
ALK	KU-60019	-0.0791234	0.0473297	238
ALK	KW-2449	-0.109833	0.00414717	238
ALK	KX2-391	-0.117495	0.00218442	238
ALK	Ki8751	-0.038218	0.424197	238
ALK	Ko-143	0.0126124	0.783406	238
ALK	L-685458	-0.0165357	0.828329	238
ALK	LE-135	-0.0416969	0.365666	238
ALK	LRRK2-IN-1	-0.132472	0.00367293	238
ALK	LY-2157299	0.0546934	0.837069	238
ALK	LY-2183240	-0.132495	0.00042421	238
ALK	MG-132	-0.0194232	0.850321	238
ALK	MGCD-265	-0.0578218	0.151981	238
ALK	MI-1	0.0313485	0.739829	238
ALK	MI-2	-0.0616494	0.378036	238
ALK	MK-0752	0.00745481	0.937883	238
ALK	MK-1775	-0.0378509	0.363926	238
ALK	MK-2206	-0.122105	0.00366946	238
ALK	ML006	-0.026132	0.654796	238
ALK	ML029	0.00224075	0.968063	238
ALK	ML031	-0.0965639	0.0246174	238
ALK	ML050	-0.079813	0.0617466	238
ALK	ML083	-0.0471512	0.693115	238
ALK	ML162	-0.0936674	0.0228017	238
ALK	ML203	-0.040744	0.452877	238
ALK	ML210	-0.12917	0.00122485	238
ALK	ML239	-0.107991	0.00876505	238
ALK	ML258	-0.0215782	0.860167	238
ALK	ML311	-0.0625615	0.108202	238
ALK	ML312	0.0384553	0.984127	238
ALK	ML320	-0.0677851	0.144047	238
ALK	ML334 diastereomer	-0.00500531	0.959716	238
ALK	MLN2238	-0.0884473	0.024923	238
ALK	MLN2480	-0.160564	0.04547	238
ALK	MST-312	-0.15315	6.0229e-05	238
ALK	Mdivi-1	-0.0912348	0.0284575	238
ALK	Merck60	-0.124586	0.00100229	238
ALK	N9-isopropylolomoucine	-0.0517954	0.220799	238
ALK	NPC-26	-0.0166413	0.910537	238
ALK	NSC 74859	-0.100056	0.0383064	238
ALK	NSC19630	-0.0907375	0.0630029	238
ALK	NSC23766	-0.105732	0.00861868	238
ALK	NSC30930	-0.041515	0.572873	238
ALK	NSC48300	-0.130446	0.000691097	238
ALK	NSC632839	-0.0672781	0.0872739	238
ALK	NSC95397	-0.133256	0.00102143	238
ALK	NVP-231	-0.0636939	0.111035	238
ALK	NVP-ADW742	-0.0960975	0.0254728	238
ALK	NVP-BEZ235	-0.0913995	0.0675618	238
ALK	NVP-BSK805	-0.0828852	0.0390775	238
ALK	NVP-TAE684	-0.0749841	0.103968	238
ALK	O-6-benzylguanine	0.0534524	0.690686	238
ALK	OSI-027	-0.115413	0.00486683	238
ALK	OSI-930	-0.0855143	0.0550311	238
ALK	PAC-1	-0.056037	0.174716	238
ALK	PD 153035	0.0750992	0.191003	238
ALK	PD318088	-0.00387271	0.951055	238
ALK	PDMP	-0.0747917	0.0819824	238
ALK	PF-184	-0.0927385	0.0195171	238
ALK	PF-3758309	-0.124559	0.0268682	238
ALK	PF-4800567 hydrochloride	0.0696445	0.999586	238
ALK	PF-543	-0.0194526	0.716842	238
ALK	PF-573228	-0.057239	0.165079	238
ALK	PF-750	0.000865793	0.9888	238
ALK	PHA-793887	-0.153914	3.7327e-05	238
ALK	PI-103	-0.114531	0.00463444	238
ALK	PIK-93	-0.110834	0.00655188	238
ALK	PL-DI	-0.113661	0.00323444	238
ALK	PLX-4720	-0.0188252	0.839057	238
ALK	PRIMA-1	-0.132045	0.000746318	238
ALK	PRIMA-1-Met	-0.0285446	0.725358	238
ALK	PRL-3 inhibitor I	-0.0571974	0.637234	238
ALK	PX-12	-0.144962	0.000133465	238
ALK	PYR-41	-0.0290725	0.618524	238
ALK	QS-11	0.026768	0.940002	238
ALK	QW-BI-011	-0.104712	0.255534	238
ALK	R428	-0.0711791	0.171725	238
ALK	RAF265	-0.0724569	0.183526	238
ALK	RG-108	-0.0377595	0.440632	238
ALK	RITA	-0.0622524	0.14496	238
ALK	RO4929097	-0.0539617	0.494996	238
ALK	Repligen 136	-0.15677	0.000139092	238
ALK	SB-225002	-0.128128	0.000609923	238
ALK	SB-431542	-0.0067656	0.966555	238
ALK	SB-525334	-0.110482	0.0168673	238
ALK	SB-743921	-0.0699613	0.0674308	238
ALK	SCH-529074	-0.10758	0.0166435	238
ALK	SCH-79797	-0.0555846	0.169797	238
ALK	SGX-523	0.00704736	0.932081	238
ALK	SID 26681509	-0.0724612	0.113131	238
ALK	SJ-172550	-0.00680829	0.968573	238
ALK	SKI-II	-0.111255	0.00897383	238
ALK	SMER-3	-0.106238	0.016255	238
ALK	SN-38	-0.042846	0.370633	238
ALK	SNS-032	-0.114228	0.00511275	238
ALK	SNX-2112	-0.0969395	0.0103238	238
ALK	SR-II-138A	-0.112697	0.00243133	238
ALK	SR1001	-0.0625576	0.350495	238
ALK	SR8278	-0.145164	0.660236	238
ALK	SRT-1720	-0.0347423	0.47591	238
ALK	STF-31	-0.0826336	0.0435237	238
ALK	SU11274	-0.119768	0.00261121	238
ALK	SZ4TA2	-0.0223473	0.882818	238
ALK	StemRegenin 1	-0.0131298	0.773942	238
ALK	TG-100-115	-0.0548703	0.297186	238
ALK	TG-101348	0.00230648	0.962992	238
ALK	TGX-221	-0.0136098	0.891101	238
ALK	TPCA-1	-0.0477605	0.251399	238
ALK	TW-37	-0.131648	0.00093324	238
ALK	UNC0321	0.0854532	0.35906	238
ALK	UNC0638	-0.0581593	0.186505	238
ALK	VAF-347	0.0473645	0.478398	238
ALK	VER-155008	-0.092967	0.0249825	238
ALK	VU0155056	0.0505185	0.868474	238
ALK	WAY-362450	0.0378306	0.998521	238
ALK	WP1130	-0.118764	0.00288906	238
ALK	WZ4002	-0.0450301	0.549219	238
ALK	WZ8040	-0.0176662	0.774313	238
ALK	XL765	-0.0321463	0.622912	238
ALK	YK 4-279	-0.117527	0.00196803	238
ALK	YM-155	-0.0893026	0.0548084	238
ALK	ZSTK474	-0.0738451	0.156889	238
ALK	abiraterone	0.107253	0.415958	238
ALK	afatinib	0.0173053	0.754809	238
ALK	alisertib	-0.0863393	0.0281416	238
ALK	alvocidib	-0.162156	0.00439697	238
ALK	apicidin	-0.120352	0.00140668	238
ALK	austocystin D	0.00169135	0.976655	238
ALK	avicin D	0.0201921	0.86301	238
ALK	avrainvillamide	-0.0634159	0.209391	238
ALK	axitinib	-0.0809788	0.0405737	238
ALK	azacitidine	-0.0494827	0.314657	238
ALK	bafilomycin A1	0.213604	0.623955	238
ALK	barasertib	-0.0848421	0.0333477	238
ALK	bardoxolone methyl	-0.0731128	0.0870421	238
ALK	belinostat	-0.141556	0.0108443	238
ALK	bendamustine	-0.0855323	0.0460167	238
ALK	betulinic acid	-0.044936	0.788261	238
ALK	bexarotene	-0.108146	0.0105156	238
ALK	birinapant	0.0176756	0.828377	238
ALK	blebbistatin	0.0425707	0.959354	238
ALK	bleomycin A2	-0.00518735	0.945851	238
ALK	bortezomib	-0.110655	0.00502263	238
ALK	bosutinib	0.0179268	0.699296	238
ALK	brefeldin A	-0.0321761	0.507174	238
ALK	brivanib	-0.0850326	0.0363719	238
ALK	cabozantinib	0.00245188	0.970248	238
ALK	canertinib	0.0086074	0.882386	238
ALK	cediranib	-0.00567888	0.976254	238
ALK	ceranib-2	-0.103768	0.00638485	238
ALK	cerulenin	-0.0806469	0.039924	238
ALK	chlorambucil	-0.093612	0.0176641	238
ALK	ciclopirox	-0.0782301	0.0401385	238
ALK	ciclosporin	0.0158665	0.809505	238
ALK	cimetidine	-0.00482298	0.995695	238
ALK	clofarabine	-0.0762455	0.0465182	238
ALK	crizotinib	-0.130256	0.000741682	238
ALK	cucurbitacin I	-0.0774694	0.0621515	238
ALK	curcumin	-0.151974	6.5774e-05	238
ALK	cyanoquinoline 11	-0.0450144	0.648045	238
ALK	cyclophosphamide	0.0346171	0.993392	238
ALK	cytarabine hydrochloride	-0.108035	0.0042893	238
ALK	cytochalasin B	-0.0167358	0.789414	238
ALK	dabrafenib	-0.0416094	0.616506	238
ALK	dacarbazine	-0.0675919	0.0893889	238
ALK	daporinad	-0.0845894	0.0591371	238
ALK	darinaparsin	-0.130206	0.0336017	238
ALK	dasatinib	0.0716081	0.118668	238
ALK	decitabine	-0.0987592	0.00937013	238
ALK	dexamethasone	-0.0785043	0.0636774	238
ALK	dinaciclib	-0.135033	0.016445	238
ALK	docetaxel	-0.0619574	0.328645	238
ALK	doxorubicin	-0.139894	0.000162935	238
ALK	elocalcitol	-0.124647	0.00128941	238
ALK	entinostat	-0.137519	0.000330314	238
ALK	epigallocatechin-3-monogallate	-0.069667	0.128015	238
ALK	erastin	-0.0298988	0.530007	238
ALK	erismodegib	0.0134545	0.90466	238
ALK	erlotinib	0.0884914	0.0415103	238
ALK	etomoxir	-0.00122611	0.998386	238
ALK	etoposide	-0.104535	0.00619276	238
ALK	fingolimod	-0.0565835	0.165914	238
ALK	fluorouracil	-0.0382734	0.34757	238
ALK	fluvastatin	-0.0109434	0.87016	238
ALK	foretinib	-0.0565802	0.197772	238
ALK	fulvestrant	-0.0103117	0.983914	238
ALK	fumonisin B1	0.00701965	0.935884	238
ALK	gefitinib	-0.00251499	0.971371	238
ALK	gemcitabine	-0.109415	0.00634087	238
ALK	gossypol	-0.105996	0.00823205	238
ALK	hyperforin	0.0113495	0.932062	238
ALK	ibrutinib	0.0657714	0.261972	238
ALK	ifosfamide	0.0327984	0.886228	238
ALK	imatinib	-0.0563631	0.19721	238
ALK	importazole	-0.0106656	0.894311	238
ALK	indisulam	-0.104062	0.00898596	238
ALK	isoevodiamine	-0.128547	0.000677844	238
ALK	isoliquiritigenin	-0.261519	0.00127201	238
ALK	isonicotinohydroxamic acid	-0.085017	0.95765	238
ALK	istradefylline	-0.036544	0.848382	238
ALK	itraconazole	-0.016702	0.85566	238
ALK	lapatinib	0.00373945	0.945054	238
ALK	lenvatinib	-0.0481983	0.307514	238
ALK	leptomycin B	-0.102726	0.00625072	238
ALK	linifanib	-0.028107	0.502805	238
ALK	linsitinib	-0.0910557	0.0321183	238
ALK	lomeguatrib	0.00428422	0.95488	238
ALK	lovastatin	-0.0155585	0.801749	238
ALK	manumycin A	-0.153802	4.4645e-05	238
ALK	marinopyrrole A	-0.0909443	0.0757775	238
ALK	masitinib	-0.0369906	0.407046	238
ALK	methotrexate	-0.0179766	0.693808	238
ALK	methylstat	-0.0145413	0.793933	238
ALK	mitomycin	-0.119184	0.00191227	238
ALK	momelotinib	-0.0432888	0.313871	238
ALK	myricetin	-0.0472542	0.666174	238
ALK	myriocin	0.0259637	0.966482	238
ALK	nakiterpiosin	-0.0808347	0.0391182	238
ALK	narciclasine	-0.127175	0.00092915	238
ALK	navitoclax	-0.0589774	0.176976	238
ALK	necrostatin-1	-0.0558743	0.245122	238
ALK	necrostatin-7	-0.0540282	0.246389	238
ALK	necrosulfonamide	-0.177313	0.000125864	238
ALK	nelarabine	0.0029217	0.994889	238
ALK	neopeltolide	-0.0925826	0.336131	238
ALK	neratinib	0.0357871	0.449764	238
ALK	neuronal differentiation inducer III	-0.0597388	0.132321	238
ALK	niclosamide	-0.146947	0.000313322	238
ALK	nilotinib	-0.0225122	0.819751	238
ALK	nintedanib	-0.0265749	0.670828	238
ALK	nutlin-3	-0.0399716	0.353947	238
ALK	obatoclax	-0.141556	0.000197626	238
ALK	olaparib	-0.101647	0.0104644	238
ALK	oligomycin A	-0.0562825	0.172823	238
ALK	omacetaxine mepesuccinate	-0.128099	0.00468931	238
ALK	ouabain	-0.0924911	0.0160295	238
ALK	paclitaxel	-0.0534163	0.186231	238
ALK	palmostatin B	-0.0341775	0.790262	238
ALK	pandacostat	-0.0672236	0.147381	238
ALK	panobinostat	-0.112428	0.00295817	238
ALK	parbendazole	-0.104468	0.00532208	238
ALK	parthenolide	-0.0340067	0.583755	238
ALK	pazopanib	-0.0594989	0.148022	238
ALK	pevonedistat	-0.040482	0.340042	238
ALK	phloretin	-0.121052	0.00189388	238
ALK	pifithrin-alpha	-0.0206412	0.784969	238
ALK	pifithrin-mu	-0.0704844	0.0817836	238
ALK	piperlongumine	-0.118777	0.00168955	238
ALK	pitstop2	-0.0774115	0.649556	238
ALK	pluripotin	0.0162627	0.785425	238
ALK	procarbazine	-0.0132952	0.958813	238
ALK	prochlorperazine	-0.0810936	0.0698978	238
ALK	purmorphamine	-0.0604551	0.203998	238
ALK	pyrazolanthrone	0.0413784	0.435609	238
ALK	quizartinib	-0.0203813	0.773219	238
ALK	regorafenib	-0.0709995	0.145624	238
ALK	rigosertib	-0.113301	0.00370901	238
ALK	ruxolitinib	-0.00738382	0.884992	238
ALK	salermide	-0.0376785	0.727358	238
ALK	saracatinib	0.0729401	0.117539	238
ALK	selumetinib	-0.0395284	0.458508	238
ALK	semagacestat	-0.0401327	0.776503	238
ALK	serdemetan	-0.0751458	0.0671537	238
ALK	sildenafil	-0.08093	0.473116	238
ALK	silmitasertib	-0.00974092	0.93138	238
ALK	simvastatin	0.020043	0.774767	238
ALK	sirolimus	-0.0893428	0.0242088	238
ALK	sitagliptin	-0.000899101	0.999223	238
ALK	skepinone-L	-0.0398474	0.555985	238
ALK	sorafenib	-0.0626751	0.154242	238
ALK	sotrastaurin	-0.0806799	0.0891288	238
ALK	spautin-1	-0.0594539	0.221132	238
ALK	staurosporine	-0.000319683	0.999346	238
ALK	sunitinib	-0.103097	0.00976796	238
ALK	tacedinaline	-0.123777	0.0074777	238
ALK	tacrolimus	-0.0512121	0.251297	238
ALK	tamatinib	0.0350168	0.68958	238
ALK	tamoxifen	0.0133846	0.879992	238
ALK	tandutinib	-0.0805193	0.0661788	238
ALK	tanespimycin	0.00139439	0.985242	238
ALK	temozolomide	0.00810546	0.928401	238
ALK	temsirolimus	-0.130221	0.0287917	238
ALK	teniposide	-0.114726	0.0350999	238
ALK	thalidomide	-0.000554277	0.998595	238
ALK	tigecycline	-0.152235	0.00858323	238
ALK	tipifarnib-P1	-0.0705691	0.0780103	238
ALK	tipifarnib-P2	-0.0491795	0.409449	238
ALK	tivantinib	-0.113922	0.0475246	238
ALK	tivozanib	-0.0375568	0.469267	238
ALK	topotecan	-0.0943534	0.0131795	238
ALK	tosedostat	-0.0688526	0.112513	238
ALK	tozasertib	-0.16333	0.335682	238
ALK	trametinib	-0.066686	0.400559	238
ALK	tretinoin	-0.0945319	0.0209794	238
ALK	triazolothiadiazine	-0.0812082	0.0323643	238
ALK	trifluoperazine	-0.0267228	0.649958	238
ALK	triptolide	-0.0832689	0.0360351	238
ALK	tubastatin A	-0.073963	0.242598	238
ALK	valdecoxib	-0.0809493	0.0458742	238
ALK	vandetanib	0.0331321	0.554608	238
ALK	veliparib	0.00133617	0.990529	238
ALK	vemurafenib	0.0118502	0.86781	238
ALK	vincristine	-0.116014	0.00168608	238
ALK	vorapaxar	-0.0165167	0.768315	238
ALK	vorinostat	-0.105471	0.00629042	238
ALK	zebularine	-0.030619	0.47527	238
APP	16-beta-bromoandrosterone	0.15259	0.000710644	351
APP	1S,3R-RSL-3	0.168794	1.2108e-05	351
APP	3-Cl-AHPC	0.301779	2.08077e-16	351
APP	968	-0.00926876	0.998628	351
APP	A-804598	-0.0217204	0.914158	351
APP	AA-COCF3	0.204151	4.49886e-07	351
APP	ABT-199	0.161976	0.00207744	351
APP	ABT-737	0.182621	1.0115e-05	351
APP	AC55649	0.0736781	0.506704	351
APP	AGK-2	-0.0093189	0.987924	351
APP	AM-580	0.109099	0.0215782	351
APP	AT-406	0.12663	0.162785	351
APP	AT13387	0.29108	1.83984e-07	351
APP	AT7867	0.216067	2.04271e-08	351
APP	AZ-3146	0.179741	5.46951e-06	351
APP	AZD1480	0.22049	0.000460711	351
APP	AZD4547	0.190848	5.65633e-06	351
APP	AZD6482	0.0603853	0.286493	351
APP	AZD7545	0.146268	0.000370032	351
APP	AZD7762	0.28602	6.61739e-15	351
APP	AZD8055	0.197693	3.52128e-07	351
APP	B02	0.24538	2.00627e-10	351
APP	BCL-LZH-4	-0.0177019	0.951014	351
APP	BEC	-0.0563937	0.999979	351
APP	BI-2536	0.355974	7.24102e-24	351
APP	BIBR-1532	0.109385	0.0116049	351
APP	BIRB-796	0.213218	3.72396e-07	351
APP	BIX-01294	0.300549	4.54902e-16	351
APP	BMS-195614	0.0389115	0.557452	351
APP	BMS-270394	0.156097	0.000210021	351
APP	BMS-345541	0.292382	7.60334e-15	351
APP	BMS-536924	0.0742994	0.143728	351
APP	BMS-754807	0.123623	0.00310701	351
APP	BRD-A02303741	0.0973332	0.0544557	351
APP	BRD-A05715709	-0.0524742	0.73627	351
APP	BRD-A71883111	0.12937	0.00174335	351
APP	BRD-A86708339	0.234904	3.9056e-05	351
APP	BRD-A94377914	0.314519	1.5743e-09	351
APP	BRD-K01737880	0.263361	0.139196	351
APP	BRD-K02251932	0.0938237	0.051459	351
APP	BRD-K02492147	-0.151514	0.00595749	351
APP	BRD-K04800985	0.0416592	0.99881	351
APP	BRD-K09344309	-0.052695	0.943791	351
APP	BRD-K09587429	-0.127088	0.0327433	351
APP	BRD-K11533227	0.191049	3.99114e-06	351
APP	BRD-K13999467	0.163945	5.3551e-05	351
APP	BRD-K14844214	0.0687092	0.296954	351
APP	BRD-K16147474	-0.0576298	0.89019	351
APP	BRD-K17060750	-0.175277	0.000145437	351
APP	BRD-K19103580	0.109997	0.0167983	351
APP	BRD-K24690302	0.20064	4.98357e-07	351
APP	BRD-K26531177	0.203441	2.43946e-07	351
APP	BRD-K27224038	0.0724112	0.785397	351
APP	BRD-K27986637	0.0614659	0.719289	351
APP	BRD-K28456706	0.206425	1.63564e-07	351
APP	BRD-K29086754	0.0502399	0.835116	351
APP	BRD-K29313308	0.181719	6.51734e-06	351
APP	BRD-K30019337	-0.0166895	0.972085	351
APP	BRD-K30748066	0.287478	0.0817341	351
APP	BRD-K33199242	0.0284806	0.965292	351
APP	BRD-K33514849	-0.021299	0.999288	351
APP	BRD-K34099515	-0.112044	0.848284	351
APP	BRD-K34222889	0.280787	1.67032e-14	351
APP	BRD-K34485477	-4.21264e-06	0.999952	351
APP	BRD-K35604418	0.192568	5.43275e-07	351
APP	BRD-K37390332	-0.0040102	0.995104	351
APP	BRD-K41334119	0.0192589	0.985102	351
APP	BRD-K41597374	0.200623	1.6705e-07	351
APP	BRD-K42260513	0.000316381	0.999265	351
APP	BRD-K44224150	-0.0564929	0.991468	351
APP	BRD-K45681478	0.114598	0.00754959	351
APP	BRD-K48334597	0.195649	0.0558466	351
APP	BRD-K48477130	-0.0136238	0.954059	351
APP	BRD-K49290616	-0.0678669	0.86666	351
APP	BRD-K50799972	0.0504238	0.473653	351
APP	BRD-K51490254	0.199706	9.10073e-07	351
APP	BRD-K51831558	0.202547	0.00240761	351
APP	BRD-K52037352	0.0443019	0.509688	351
APP	BRD-K55116708	0.163245	9.8154e-05	351
APP	BRD-K61166597	0.276678	4.64308e-13	351
APP	BRD-K63431240	0.140729	0.000525538	351
APP	BRD-K64610608	-0.0723487	0.496363	351
APP	BRD-K66453893	0.35185	2.36054e-22	351
APP	BRD-K66532283	0.272068	1.37313e-12	351
APP	BRD-K70511574	0.332773	4.93415e-20	351
APP	BRD-K71781559	0.0655855	0.950041	351
APP	BRD-K75293299	-0.123355	0.572955	351
APP	BRD-K78574327	-0.0917576	0.961105	351
APP	BRD-K80183349	0.306874	2.12599e-16	351
APP	BRD-K84807411	0.0379643	0.909086	351
APP	BRD-K85133207	0.18964	5.679e-06	351
APP	BRD-K86535717	-0.141985	0.619735	351
APP	BRD-K88742110	0.189175	1.82842e-06	351
APP	BRD-K90370028	0.0277182	0.955819	351
APP	BRD-K92856060	0.157972	7.7391e-05	351
APP	BRD-K96431673	-0.0688533	0.985799	351
APP	BRD-K96970199	-0.00755874	0.998764	351
APP	BRD-K97651142	0.167084	3.2285e-05	351
APP	BRD-K99006945	-0.0550795	0.464197	351
APP	BRD-M00053801	0.0721562	0.453855	351
APP	BRD1378	-0.0406461	0.726215	351
APP	BRD1812	0.244974	1.27987e-10	351
APP	BRD1835	0.0993592	0.0293842	351
APP	BRD4132	0.0525077	0.409079	351
APP	BRD5468	-0.0197575	0.859042	351
APP	BRD6340	0.258251	1.6869e-11	351
APP	BRD8899	-0.0654426	0.518364	351
APP	BRD8958	0.0294886	0.982209	351
APP	BRD9647	0.120799	0.00871013	351
APP	BRD9876	0.0925227	0.109042	351
APP	BYL-719	-0.0123194	0.890515	351
APP	Bax channel blocker	0.242628	3.61988e-09	351
APP	C6-ceramide	-0.019942	0.892172	351
APP	CAL-101	0.0455432	0.467596	351
APP	CAY10576	-0.0022445	0.982097	351
APP	CAY10594	0.0766249	0.16935	351
APP	CAY10618	0.196137	1.90568e-07	351
APP	CBB-1007	-0.0550974	0.752732	351
APP	CCT036477	0.215358	1.02084e-08	351
APP	CD-1530	0.114812	0.0232393	351
APP	CD-437	0.343809	2.6158e-21	351
APP	CHIR-99021	0.198146	6.59748e-07	351
APP	CHM-1	0.338204	6.59975e-21	351
APP	CI-976	-0.0173824	0.9307	351
APP	CID-5951923	-0.0303517	0.749375	351
APP	CIL41	0.105971	0.115978	351
APP	CIL55	0.0596318	0.798369	351
APP	CIL55A	0.261629	4.20682e-06	351
APP	CIL56	0.239189	2.7239e-05	351
APP	CIL70	0.181991	0.000939835	351
APP	COL-3	0.298575	7.35453e-12	351
APP	CR-1-31B	0.328163	5.65132e-20	351
APP	Ch-55	0.13084	0.00270114	351
APP	Compound 1541A	0.13568	0.0101941	351
APP	Compound 23 citrate	0.264841	2.25213e-12	351
APP	Compound 7d-cis	0.180993	1.3372e-05	351
APP	DBeQ	0.167679	4.7919e-05	351
APP	DNMDP	0.0105274	0.91219	351
APP	ELCPK	0.301744	5.52153e-08	351
APP	ETP-46464	0.184534	0.000185514	351
APP	EX-527	0.0143547	0.924119	351
APP	FGIN-1-27	-0.140136	0.228496	351
APP	FQI-1	0.323225	4.62648e-10	351
APP	FQI-2	0.31478	2.07396e-18	351
APP	FSC231	-0.147025	0.99945	351
APP	GANT-61	0.100866	0.0547918	351
APP	GDC-0879	-0.0192059	0.773644	351
APP	GDC-0941	0.118645	0.0052605	351
APP	GMX-1778	0.163746	2.6575e-05	351
APP	GSK-3 inhibitor IX	0.192621	1.84539e-06	351
APP	GSK-J4	0.243178	0.10978	351
APP	GSK1059615	-0.000968076	0.997305	351
APP	GSK2636771	-0.0209014	0.86523	351
APP	GSK4112	0.0996598	0.0300988	351
APP	GSK461364	0.363377	8.15e-24	351
APP	GSK525762A	0.28204	1.11275e-14	351
APP	GW-405833	0.295208	1.22086e-15	351
APP	GW-843682X	0.266634	4.87053e-12	351
APP	HBX-41108	0.136711	0.00781538	351
APP	HC-067047	0.107884	0.0472611	351
APP	HLI 373	0.201664	2.66831e-07	351
APP	I-BET151	0.307311	1.63011e-17	351
APP	IC-87114	0.0115378	0.904108	351
APP	IPR-456	0.0112605	0.957344	351
APP	ISOX	0.311617	1.50061e-17	351
APP	IU1	0.0674097	0.425843	351
APP	JQ-1	0.286846	3.20136e-15	351
APP	JW-480	0.0375451	0.839574	351
APP	JW-55	-0.214815	0.0792363	351
APP	JW-74	0.0129111	0.915301	351
APP	KH-CB19	-0.0409183	0.719773	351
APP	KHS101	0.146617	0.000332797	351
APP	KPT185	0.27571	1.49247e-10	351
APP	KU 0060648	0.178435	4.31559e-06	351
APP	KU-0063794	0.207134	1.58713e-07	351
APP	KU-55933	0.172652	2.388e-05	351
APP	KU-60019	0.242894	1.09256e-10	351
APP	KW-2449	0.348229	4.69297e-22	351
APP	KX2-391	0.342932	3.85404e-21	351
APP	Ki8751	0.170313	2.7947e-05	351
APP	Ko-143	0.207115	7.07981e-08	351
APP	L-685458	0.0825469	0.132769	351
APP	LE-135	0.169519	4.6197e-05	351
APP	LRRK2-IN-1	0.337213	6.67198e-15	351
APP	LY-2157299	-0.110483	0.613444	351
APP	LY-2183240	0.354559	4.65652e-23	351
APP	MG-132	0.259689	0.000333191	351
APP	MGCD-265	0.243522	9.07207e-11	351
APP	MI-1	-0.00960775	0.936674	351
APP	MI-2	0.146714	0.0221706	351
APP	MK-0752	-0.083788	0.221074	351
APP	MK-1775	0.27588	1.33133e-13	351
APP	MK-2206	0.189664	3.71239e-06	351
APP	ML006	0.0975328	0.0574429	351
APP	ML029	0.151606	0.000278242	351
APP	ML031	0.207262	5.61456e-07	351
APP	ML050	0.190071	2.20265e-06	351
APP	ML083	-0.0480079	0.686022	351
APP	ML162	0.138073	0.000532938	351
APP	ML203	0.107666	0.0324176	351
APP	ML210	0.182043	3.2817e-06	351
APP	ML239	0.173038	1.2368e-05	351
APP	ML258	0.0101205	0.941988	351
APP	ML311	0.322355	2.51877e-19	351
APP	ML312	-0.0748821	0.966091	351
APP	ML320	0.12436	0.0041371	351
APP	ML334 diastereomer	-0.0682704	0.327719	351
APP	MLN2238	0.246431	6.50465e-11	351
APP	MLN2480	0.0446138	0.697528	351
APP	MST-312	0.263912	1.59087e-12	351
APP	Mdivi-1	0.206868	1.8432e-07	351
APP	Merck60	0.278414	2.41071e-14	351
APP	N9-isopropylolomoucine	0.209345	9.43832e-08	351
APP	NPC-26	0.104791	0.293409	351
APP	NSC 74859	0.144942	0.00229239	351
APP	NSC19630	0.175798	0.000150591	351
APP	NSC23766	0.210121	5.81434e-08	351
APP	NSC30930	-0.090725	0.162821	351
APP	NSC48300	0.255814	5.86081e-12	351
APP	NSC632839	0.286105	6.65044e-15	351
APP	NSC95397	0.266407	1.14581e-11	351
APP	NVP-231	0.294729	1.21907e-15	351
APP	NVP-ADW742	0.164179	6.6124e-05	351
APP	NVP-BEZ235	0.225888	1.75256e-06	351
APP	NVP-BSK805	0.27019	6.77131e-13	351
APP	NVP-TAE684	0.0983682	0.0273103	351
APP	O-6-benzylguanine	0.109971	0.336137	351
APP	OSI-027	0.191802	1.46938e-06	351
APP	OSI-930	0.233298	2.39398e-08	351
APP	PAC-1	0.248369	7.61235e-11	351
APP	PD 153035	-0.0858225	0.126112	351
APP	PD318088	-0.178626	1.2766e-05	351
APP	PDMP	0.16687	3.8383e-05	351
APP	PF-184	0.341997	3.13588e-20	351
APP	PF-3758309	0.243945	6.99167e-06	351
APP	PF-4800567 hydrochloride	0.0170717	0.999586	351
APP	PF-543	0.180459	3.1419e-05	351
APP	PF-573228	0.242959	1.04664e-10	351
APP	PF-750	0.094539	0.0397557	351
APP	PHA-793887	0.292693	6.93e-16	351
APP	PI-103	0.150437	0.000157139	351
APP	PIK-93	0.211372	7.44285e-08	351
APP	PL-DI	0.290915	2.90067e-15	351
APP	PLX-4720	-0.0525079	0.464501	351
APP	PRIMA-1	0.289478	1.67541e-14	351
APP	PRIMA-1-Met	0.200283	0.00145436	351
APP	PRL-3 inhibitor I	-0.0192681	0.910664	351
APP	PX-12	0.345588	1.82584e-21	351
APP	PYR-41	0.0889939	0.0796534	351
APP	QS-11	0.0622417	0.826731	351
APP	QW-BI-011	0.322629	6.891e-05	351
APP	R428	0.199002	2.6368e-05	351
APP	RAF265	0.113243	0.0260337	351
APP	RG-108	0.157107	0.00012797	351
APP	RITA	0.193329	8.95856e-07	351
APP	RO4929097	0.137601	0.0578691	351
APP	Repligen 136	0.191961	2.26742e-06	351
APP	SB-225002	0.339284	1.59235e-21	351
APP	SB-431542	-0.00233769	0.989042	351
APP	SB-525334	0.0305001	0.59587	351
APP	SB-743921	0.341662	6.27942e-22	351
APP	SCH-529074	0.157216	0.000297009	351
APP	SCH-79797	0.281554	2.58776e-14	351
APP	SGX-523	-0.0748271	0.176291	351
APP	SID 26681509	0.14564	0.000681045	351
APP	SJ-172550	0.0440732	0.696214	351
APP	SKI-II	0.201585	8.82508e-07	351
APP	SMER-3	0.188808	9.11584e-06	351
APP	SN-38	0.268773	6.70741e-11	351
APP	SNS-032	0.218426	3.51195e-08	351
APP	SNX-2112	0.328514	6.59412e-20	351
APP	SR-II-138A	0.332888	6.34227e-21	351
APP	SR1001	0.0719788	0.268031	351
APP	SR8278	0.118344	0.72826	351
APP	SRT-1720	0.189186	5.62912e-06	351
APP	STF-31	0.209403	5.17249e-08	351
APP	SU11274	0.205989	1.10683e-07	351
APP	SZ4TA2	-0.0603345	0.608054	351
APP	StemRegenin 1	0.23207	1.45953e-09	351
APP	TG-100-115	0.132933	0.00373715	351
APP	TG-101348	0.209781	4.35328e-08	351
APP	TGX-221	0.0600071	0.378083	351
APP	TPCA-1	0.228509	1.06516e-09	351
APP	TW-37	0.18873	1.43778e-06	351
APP	UNC0321	-0.0355386	0.767036	351
APP	UNC0638	0.202787	3.28589e-07	351
APP	VAF-347	-0.164696	0.00405026	351
APP	VER-155008	0.181917	6.24724e-06	351
APP	VU0155056	-0.0311885	0.935941	351
APP	WAY-362450	0.0265365	0.998521	351
APP	WP1130	0.176075	6.11476e-06	351
APP	WZ4002	0.0468863	0.531527	351
APP	WZ8040	0.111865	0.0186381	351
APP	XL765	0.119991	0.0169291	351
APP	YK 4-279	0.32298	3.54648e-19	351
APP	YM-155	0.0524225	0.288802	351
APP	ZSTK474	0.124367	0.011456	351
APP	abiraterone	-0.205047	0.0806139	351
APP	afatinib	-0.0131486	0.816556	351
APP	alisertib	0.232461	4.55155e-10	351
APP	alvocidib	0.315989	8.44794e-09	351
APP	apicidin	0.302069	5.80399e-17	351
APP	austocystin D	-0.0970089	0.0325213	351
APP	avicin D	0.117004	0.140543	351
APP	avrainvillamide	0.194261	2.5976e-05	351
APP	axitinib	0.254685	5.8761e-12	351
APP	azacitidine	0.157476	0.000634936	351
APP	bafilomycin A1	0.0704584	0.914652	351
APP	barasertib	0.230626	7.92989e-10	351
APP	bardoxolone methyl	0.280537	2.11197e-12	351
APP	belinostat	0.371931	9.34074e-13	351
APP	bendamustine	0.205129	5.72166e-07	351
APP	betulinic acid	-0.0196559	0.922777	351
APP	bexarotene	0.167907	5.1506e-05	351
APP	birinapant	0.0193362	0.81172	351
APP	blebbistatin	-0.00749689	0.992862	351
APP	bleomycin A2	0.0695189	0.190483	351
APP	bortezomib	0.238478	3.64238e-10	351
APP	bosutinib	0.153991	0.00010751	351
APP	brefeldin A	0.120324	0.00504869	351
APP	brivanib	0.18515	2.55567e-06	351
APP	cabozantinib	0.150023	0.000638421	351
APP	canertinib	0.01226	0.8273	351
APP	cediranib	-0.00372034	0.98393	351
APP	ceranib-2	0.300843	7.11992e-17	351
APP	cerulenin	0.241103	1.04905e-10	351
APP	chlorambucil	0.298939	7.84281e-16	351
APP	ciclopirox	0.325219	1.36553e-19	351
APP	ciclosporin	0.0647425	0.227092	351
APP	cimetidine	-0.0657609	0.960112	351
APP	clofarabine	0.354129	2.9265e-23	351
APP	crizotinib	0.273618	1.82261e-13	351
APP	cucurbitacin I	0.181295	3.42402e-06	351
APP	curcumin	0.255176	6.38732e-12	351
APP	cyanoquinoline 11	0.0759503	0.378615	351
APP	cyclophosphamide	-0.0428979	0.993392	351
APP	cytarabine hydrochloride	0.353983	4.35683e-23	351
APP	cytochalasin B	0.0363652	0.515485	351
APP	dabrafenib	0.0626078	0.423234	351
APP	dacarbazine	0.239589	1.82524e-10	351
APP	daporinad	0.189175	6.20846e-06	351
APP	darinaparsin	0.195812	0.000862925	351
APP	dasatinib	-0.0946356	0.0312561	351
APP	decitabine	0.302313	5.66129e-17	351
APP	dexamethasone	0.163536	6.8672e-05	351
APP	dinaciclib	0.307249	1.14432e-08	351
APP	docetaxel	0.30902	2.88776e-08	351
APP	doxorubicin	0.339596	1.17188e-21	351
APP	elocalcitol	0.290352	9.78637e-15	351
APP	entinostat	0.293411	1.98997e-15	351
APP	epigallocatechin-3-monogallate	0.232595	2.40634e-08	351
APP	erastin	0.13899	0.000564896	351
APP	erismodegib	-0.0956218	0.15236	351
APP	erlotinib	-0.0720561	0.10594	351
APP	etomoxir	0.0141312	0.980958	351
APP	etoposide	0.32469	2.68853e-19	351
APP	fingolimod	0.220537	7.0807e-09	351
APP	fluorouracil	0.23272	5.33439e-10	351
APP	fluvastatin	0.0348043	0.547015	351
APP	foretinib	0.197691	5.21399e-07	351
APP	fulvestrant	0.143473	0.628334	351
APP	fumonisin B1	0.0885674	0.0878187	351
APP	gefitinib	-0.0562027	0.275054	351
APP	gemcitabine	0.340954	2.03563e-19	351
APP	gossypol	0.245422	2.05163e-10	351
APP	hyperforin	-0.024107	0.827642	351
APP	ibrutinib	0.0185628	0.790687	351
APP	ifosfamide	-0.0779259	0.667842	351
APP	imatinib	0.195588	1.25902e-06	351
APP	importazole	0.0776151	0.182401	351
APP	indisulam	0.283508	5.81367e-14	351
APP	isoevodiamine	0.324848	3.01382e-19	351
APP	isoliquiritigenin	0.308969	0.000113149	351
APP	isonicotinohydroxamic acid	0.01386	0.992739	351
APP	istradefylline	0.0358905	0.852334	351
APP	itraconazole	0.0336694	0.663221	351
APP	lapatinib	0.0835649	0.0578723	351
APP	lenvatinib	0.154904	0.000146176	351
APP	leptomycin B	0.29329	2.50679e-16	351
APP	linifanib	0.241356	9.11866e-11	351
APP	linsitinib	0.119973	0.00388055	351
APP	lomeguatrib	0.0606709	0.268504	351
APP	lovastatin	-0.00610645	0.928451	351
APP	manumycin A	0.301807	1.43543e-16	351
APP	marinopyrrole A	0.21501	9.66768e-06	351
APP	masitinib	0.197547	5.30246e-07	351
APP	methotrexate	0.182651	4.99327e-06	351
APP	methylstat	0.178112	0.000124646	351
APP	mitomycin	0.317333	3.52857e-18	351
APP	momelotinib	0.243172	4.61205e-10	351
APP	myricetin	0.0339134	0.772803	351
APP	myriocin	-0.0613718	0.899811	351
APP	nakiterpiosin	0.328264	2.00965e-19	351
APP	narciclasine	0.324117	1.1491e-18	351
APP	navitoclax	0.137001	0.000671943	351
APP	necrostatin-1	0.0893855	0.049261	351
APP	necrostatin-7	0.097412	0.0255466	351
APP	necrosulfonamide	0.303348	1.18471e-11	351
APP	nelarabine	0.0170549	0.964901	351
APP	neopeltolide	0.239924	0.00521701	351
APP	neratinib	0.047806	0.295232	351
APP	neuronal differentiation inducer III	0.264024	1.03271e-12	351
APP	niclosamide	0.0595727	0.182618	351
APP	nilotinib	0.0615905	0.403541	351
APP	nintedanib	0.111288	0.0218226	351
APP	nutlin-3	0.21684	1.69362e-08	351
APP	obatoclax	0.240301	9.42758e-11	351
APP	olaparib	0.19448	3.30845e-07	351
APP	oligomycin A	0.148281	0.000146096	351
APP	omacetaxine mepesuccinate	0.299253	5.71071e-12	351
APP	ouabain	0.23195	3.52207e-10	351
APP	paclitaxel	0.285737	1.02044e-14	351
APP	palmostatin B	0.0424652	0.72415	351
APP	pandacostat	0.148974	0.00106904	351
APP	panobinostat	0.339869	2.30828e-21	351
APP	parbendazole	0.350695	4.52429e-23	351
APP	parthenolide	0.103248	0.0485002	351
APP	pazopanib	0.281022	8.95834e-14	351
APP	pevonedistat	0.241548	2.31578e-10	351
APP	phloretin	0.263461	2.37551e-12	351
APP	pifithrin-alpha	0.11019	0.0367375	351
APP	pifithrin-mu	0.223968	3.53441e-09	351
APP	piperlongumine	0.279157	1.83538e-14	351
APP	pitstop2	0.0768517	0.653785	351
APP	pluripotin	0.0426225	0.413993	351
APP	procarbazine	-0.0319896	0.870587	351
APP	prochlorperazine	0.162494	9.6425e-05	351
APP	purmorphamine	0.105195	0.021593	351
APP	pyrazolanthrone	0.122524	0.00625039	351
APP	quizartinib	0.096451	0.0739587	351
APP	regorafenib	0.116798	0.0120686	351
APP	rigosertib	0.325571	1.42063e-18	351
APP	ruxolitinib	0.281375	4.45379e-13	351
APP	salermide	0.0839127	0.339783	351
APP	saracatinib	-0.0847767	0.0619537	351
APP	selumetinib	-0.20045	1.50891e-06	351
APP	semagacestat	-0.0604222	0.621768	351
APP	serdemetan	0.275107	7.73121e-13	351
APP	sildenafil	0.0175294	0.910782	351
APP	silmitasertib	0.00800942	0.944579	351
APP	simvastatin	-0.0836099	0.127604	351
APP	sirolimus	0.256718	1.04158e-11	351
APP	sitagliptin	-0.0668535	0.997718	351
APP	skepinone-L	0.199874	0.000784578	351
APP	sorafenib	0.112865	0.00738798	351
APP	sotrastaurin	0.339324	1.05357e-14	351
APP	spautin-1	0.0703252	0.143327	351
APP	staurosporine	0.112683	0.353818	351
APP	sunitinib	0.244548	1.2978e-10	351
APP	tacedinaline	0.2769	3.47995e-10	351
APP	tacrolimus	0.196255	1.05194e-06	351
APP	tamatinib	0.019437	0.843863	351
APP	tamoxifen	0.079364	0.184899	351
APP	tandutinib	0.165474	6.3062e-05	351
APP	tanespimycin	0.0872032	0.0809639	351
APP	temozolomide	0.111302	0.0592685	351
APP	temsirolimus	0.234163	3.8549e-05	351
APP	teniposide	0.392633	5.81333e-15	351
APP	thalidomide	-0.0188847	0.944409	351
APP	tigecycline	0.237585	2.6706e-05	351
APP	tipifarnib-P1	0.229192	1.87449e-09	351
APP	tipifarnib-P2	0.286291	2.88971e-08	351
APP	tivantinib	0.327795	8.45542e-10	351
APP	tivozanib	0.121851	0.00616426	351
APP	topotecan	0.339262	1.94333e-21	351
APP	tosedostat	0.119009	0.0041051	351
APP	tozasertib	0.249188	0.116864	351
APP	trametinib	-0.155901	0.0200227	351
APP	tretinoin	0.243711	3.14537e-10	351
APP	triazolothiadiazine	0.367278	2.36774e-25	351
APP	trifluoperazine	0.147083	0.00123543	351
APP	triptolide	0.210206	3.08087e-08	351
APP	tubastatin A	0.241602	2.0197e-05	351
APP	valdecoxib	0.201759	2.0845e-07	351
APP	vandetanib	-0.110934	0.0162129	351
APP	veliparib	0.0509255	0.513918	351
APP	vemurafenib	-0.0445348	0.445843	351
APP	vincristine	0.357632	1.64362e-24	351
APP	vorapaxar	0.132679	0.00239383	351
APP	vorinostat	0.331433	9.4148e-20	351
APP	zebularine	0.21968	9.47025e-09	351
ATRX	16-beta-bromoandrosterone	-0.0438774	0.383546	546
ATRX	1S,3R-RSL-3	-0.0936572	0.0197272	546
ATRX	3-Cl-AHPC	-0.102197	0.00837633	546
ATRX	968	0.158529	0.899628	546
ATRX	A-804598	-0.0776329	0.579252	546
ATRX	AA-COCF3	-0.0100686	0.83302	546
ATRX	ABT-199	-0.127234	0.0176004	546
ATRX	ABT-737	-0.0753118	0.0923628	546
ATRX	AC55649	-0.0475403	0.695647	546
ATRX	AGK-2	-0.0250438	0.952125	546
ATRX	AM-580	-0.0190621	0.761006	546
ATRX	AT-406	0.0126569	0.933465	546
ATRX	AT13387	-0.100327	0.0907352	546
ATRX	AT7867	-0.103716	0.0103634	546
ATRX	AZ-3146	-0.057758	0.180582	546
ATRX	AZD1480	-0.11062	0.108289	546
ATRX	AZD4547	-0.0595536	0.212142	546
ATRX	AZD6482	-0.0623635	0.267974	546
ATRX	AZD7545	-0.0337432	0.469884	546
ATRX	AZD7762	-0.00795049	0.858314	546
ATRX	AZD8055	-0.0627088	0.126416	546
ATRX	B02	-0.0642196	0.120944	546
ATRX	BCL-LZH-4	0.0801062	0.672659	546
ATRX	BEC	-0.0506684	0.999979	546
ATRX	BI-2536	-0.106151	0.00455013	546
ATRX	BIBR-1532	-0.126976	0.00300472	546
ATRX	BIRB-796	-0.0218742	0.66803	546
ATRX	BIX-01294	-0.0272133	0.518715	546
ATRX	BMS-195614	-0.102672	0.0650742	546
ATRX	BMS-270394	-0.0133471	0.809191	546
ATRX	BMS-345541	0.00124019	0.978375	546
ATRX	BMS-536924	0.00175056	0.981487	546
ATRX	BMS-754807	-0.058025	0.209814	546
ATRX	BRD-A02303741	-0.0641167	0.230642	546
ATRX	BRD-A05715709	0.00162951	0.993675	546
ATRX	BRD-A71883111	-0.00545974	0.919816	546
ATRX	BRD-A86708339	-0.183588	0.00157197	546
ATRX	BRD-A94377914	-0.0287513	0.647484	546
ATRX	BRD-K01737880	-0.237938	0.188674	546
ATRX	BRD-K02251932	-0.0926178	0.0550795	546
ATRX	BRD-K02492147	-0.0114384	0.875017	546
ATRX	BRD-K04800985	0.0174527	0.99881	546
ATRX	BRD-K09344309	-0.155636	0.678914	546
ATRX	BRD-K09587429	0.0305458	0.665149	546
ATRX	BRD-K11533227	-0.0156867	0.755115	546
ATRX	BRD-K13999467	-0.0724008	0.0943435	546
ATRX	BRD-K14844214	-0.0253858	0.762421	546
ATRX	BRD-K16147474	0.0538141	0.89019	546
ATRX	BRD-K17060750	-0.013613	0.823829	546
ATRX	BRD-K19103580	-0.0652289	0.184692	546
ATRX	BRD-K24690302	-0.0638698	0.140961	546
ATRX	BRD-K26531177	-0.0674393	0.109415	546
ATRX	BRD-K27224038	0.0887317	0.721934	546
ATRX	BRD-K27986637	0.0649172	0.701974	546
ATRX	BRD-K28456706	-0.0257422	0.580482	546
ATRX	BRD-K29086754	0.106823	0.560342	546
ATRX	BRD-K29313308	-0.0244077	0.607279	546
ATRX	BRD-K30019337	0.102676	0.690793	546
ATRX	BRD-K30748066	0.112097	0.551471	546
ATRX	BRD-K33199242	0.0343095	0.960439	546
ATRX	BRD-K33514849	-0.136297	0.999288	546
ATRX	BRD-K34099515	-0.168015	0.788957	546
ATRX	BRD-K34222889	-0.112316	0.00332925	546
ATRX	BRD-K34485477	0.0709574	0.998562	546
ATRX	BRD-K35604418	-0.0885059	0.026247	546
ATRX	BRD-K37390332	0.00745611	0.989291	546
ATRX	BRD-K41334119	0.0808787	0.895261	546
ATRX	BRD-K41597374	-0.0920861	0.0218957	546
ATRX	BRD-K42260513	0.00552304	0.998533	546
ATRX	BRD-K44224150	0.204409	0.926901	546
ATRX	BRD-K45681478	-0.0590394	0.195156	546
ATRX	BRD-K48334597	0.00190261	0.991798	546
ATRX	BRD-K48477130	0.0776112	0.695101	546
ATRX	BRD-K49290616	-0.00906228	0.990237	546
ATRX	BRD-K50799972	0.0560588	0.415006	546
ATRX	BRD-K51490254	-0.0920394	0.0285096	546
ATRX	BRD-K51831558	-0.133828	0.0485986	546
ATRX	BRD-K52037352	0.000571493	0.993817	546
ATRX	BRD-K55116708	0.041644	0.386798	546
ATRX	BRD-K61166597	-0.0529052	0.202341	546
ATRX	BRD-K63431240	-0.00402204	0.942283	546
ATRX	BRD-K64610608	-0.069621	0.51614	546
ATRX	BRD-K66453893	-0.04378	0.274244	546
ATRX	BRD-K66532283	0.00827441	0.858621	546
ATRX	BRD-K70511574	-0.0392194	0.33365	546
ATRX	BRD-K71781559	-0.0105693	0.996572	546
ATRX	BRD-K75293299	0.084564	0.742232	546
ATRX	BRD-K78574327	0.0317104	0.982295	546
ATRX	BRD-K80183349	-0.0356076	0.39842	546
ATRX	BRD-K84807411	0.0915299	0.715498	546
ATRX	BRD-K85133207	-0.0117333	0.819362	546
ATRX	BRD-K86535717	0.01238	0.982605	546
ATRX	BRD-K88742110	-0.0396228	0.371045	546
ATRX	BRD-K90370028	-0.0336713	0.950652	546
ATRX	BRD-K92856060	-0.147009	0.000248702	546
ATRX	BRD-K96431673	-0.0624755	0.986141	546
ATRX	BRD-K96970199	-0.0215704	0.998764	546
ATRX	BRD-K97651142	-0.12078	0.00311637	546
ATRX	BRD-K99006945	0.142543	0.0392302	546
ATRX	BRD-M00053801	-0.128095	0.126941	546
ATRX	BRD1378	0.00824472	0.958628	546
ATRX	BRD1812	-0.108078	0.0067389	546
ATRX	BRD1835	-0.0180163	0.74965	546
ATRX	BRD4132	-0.108649	0.0667293	546
ATRX	BRD5468	-0.0251357	0.811443	546
ATRX	BRD6340	-0.0354018	0.401531	546
ATRX	BRD8899	0.0181069	0.888749	546
ATRX	BRD8958	-0.0180126	0.983739	546
ATRX	BRD9647	-0.0448686	0.402457	546
ATRX	BRD9876	-0.112588	0.0448685	546
ATRX	BYL-719	-0.0486197	0.49737	546
ATRX	Bax channel blocker	-0.0501005	0.282696	546
ATRX	C6-ceramide	-0.0499442	0.652851	546
ATRX	CAL-101	0.043191	0.498366	546
ATRX	CAY10576	-0.0228406	0.787424	546
ATRX	CAY10594	-0.0553504	0.342955	546
ATRX	CAY10618	-0.126697	0.0010609	546
ATRX	CBB-1007	-0.0519498	0.771819	546
ATRX	CCT036477	-0.0488497	0.235105	546
ATRX	CD-1530	-0.0420997	0.464533	546
ATRX	CD-437	-0.0884578	0.0231128	546
ATRX	CHIR-99021	-0.0133628	0.786721	546
ATRX	CHM-1	-0.0647736	0.0962337	546
ATRX	CI-976	-0.0837067	0.47502	546
ATRX	CID-5951923	-0.0622568	0.444764	546
ATRX	CIL41	-0.0688925	0.333849	546
ATRX	CIL55	0.0635672	0.783213	546
ATRX	CIL55A	0.0285333	0.677717	546
ATRX	CIL56	-0.00136227	0.985844	546
ATRX	CIL70	-0.147992	0.00815227	546
ATRX	COL-3	-0.0615668	0.192669	546
ATRX	CR-1-31B	-0.0402281	0.303081	546
ATRX	Ch-55	-0.0370512	0.480974	546
ATRX	Compound 1541A	0.00603094	0.948093	546
ATRX	Compound 23 citrate	-0.036363	0.383657	546
ATRX	Compound 7d-cis	-0.0407091	0.378742	546
ATRX	DBeQ	-0.069835	0.11015	546
ATRX	DNMDP	0.011047	0.907467	546
ATRX	ELCPK	0.0355908	0.598773	546
ATRX	ETP-46464	-0.0756535	0.160133	546
ATRX	EX-527	-0.0891441	0.380559	546
ATRX	FGIN-1-27	0.0549772	0.695325	546
ATRX	FQI-1	0.023977	0.700868	546
ATRX	FQI-2	-0.0414396	0.301791	546
ATRX	FSC231	0.15599	0.99945	546
ATRX	GANT-61	-0.0402559	0.521606	546
ATRX	GDC-0879	0.0254448	0.690032	546
ATRX	GDC-0941	-0.0161505	0.76351	546
ATRX	GMX-1778	-0.133012	0.000761956	546
ATRX	GSK-3 inhibitor IX	-0.0282969	0.545843	546
ATRX	GSK-J4	-0.205268	0.189686	546
ATRX	GSK1059615	0.00378585	0.993359	546
ATRX	GSK2636771	-0.0244597	0.838074	546
ATRX	GSK4112	-0.0182543	0.754414	546
ATRX	GSK461364	-0.0969027	0.011984	546
ATRX	GSK525762A	-0.0170176	0.686426	546
ATRX	GW-405833	-0.0652379	0.100112	546
ATRX	GW-843682X	-0.0408986	0.346538	546
ATRX	HBX-41108	-0.109413	0.0383449	546
ATRX	HC-067047	-0.0111785	0.887276	546
ATRX	HLI 373	-0.0714911	0.0909554	546
ATRX	I-BET151	-0.0395059	0.319078	546
ATRX	IC-87114	0.0473394	0.484484	546
ATRX	IPR-456	-0.0573623	0.667312	546
ATRX	ISOX	-0.0630946	0.111188	546
ATRX	IU1	-0.0749272	0.364042	546
ATRX	JQ-1	-0.0292436	0.475047	546
ATRX	JW-480	-0.0325876	0.857318	546
ATRX	JW-55	-0.0413223	0.774401	546
ATRX	JW-74	-0.0997471	0.191003	546
ATRX	KH-CB19	-0.0120011	0.929561	546
ATRX	KHS101	-0.0905168	0.0318523	546
ATRX	KPT185	-0.108386	0.0172665	546
ATRX	KU 0060648	-0.00269535	0.955997	546
ATRX	KU-0063794	-0.0797227	0.0515176	546
ATRX	KU-55933	-0.0369331	0.426807	546
ATRX	KU-60019	-0.0559403	0.1709	546
ATRX	KW-2449	-0.117554	0.00207164	546
ATRX	KX2-391	-0.092022	0.0177047	546
ATRX	Ki8751	-0.090249	0.0358802	546
ATRX	Ko-143	-0.0625913	0.128329	546
ATRX	L-685458	-0.0541928	0.362969	546
ATRX	LE-135	-0.123104	0.00346411	546
ATRX	LRRK2-IN-1	-0.0723516	0.12326	546
ATRX	LY-2157299	-0.00341285	0.993645	546
ATRX	LY-2183240	-0.11697	0.0019521	546
ATRX	MG-132	-0.0859512	0.303082	546
ATRX	MGCD-265	-0.0814062	0.0392638	546
ATRX	MI-1	0.0395933	0.657639	546
ATRX	MI-2	-0.0827514	0.22128	546
ATRX	MK-0752	0.00190141	0.983671	546
ATRX	MK-1775	-0.00904599	0.842209	546
ATRX	MK-2206	-0.0234126	0.629001	546
ATRX	ML006	-0.0245578	0.676285	546
ATRX	ML029	-0.0596944	0.188733	546
ATRX	ML031	-0.113981	0.00742912	546
ATRX	ML050	-0.0975331	0.0203723	546
ATRX	ML083	-0.0113649	0.940541	546
ATRX	ML162	-0.117496	0.0036258	546
ATRX	ML203	-0.0233022	0.688867	546
ATRX	ML210	-0.11135	0.00576764	546
ATRX	ML239	-0.112831	0.0059415	546
ATRX	ML258	0.00567708	0.967676	546
ATRX	ML311	-0.0811102	0.0347904	546
ATRX	ML312	0.0645617	0.968439	546
ATRX	ML320	-0.0185428	0.733348	546
ATRX	ML334 diastereomer	0.00913803	0.927291	546
ATRX	MLN2238	-0.00510905	0.913224	546
ATRX	MLN2480	-0.12767	0.128896	546
ATRX	MST-312	-0.0840018	0.031605	546
ATRX	Mdivi-1	-0.0163728	0.733774	546
ATRX	Merck60	-0.0680087	0.0810762	546
ATRX	N9-isopropylolomoucine	-0.00341441	0.943893	546
ATRX	NPC-26	-0.0650845	0.516032	546
ATRX	NSC 74859	-0.0352722	0.530755	546
ATRX	NSC19630	-0.0515109	0.315467	546
ATRX	NSC23766	-0.0348297	0.425889	546
ATRX	NSC30930	0.0347319	0.650462	546
ATRX	NSC48300	-0.0278026	0.509372	546
ATRX	NSC632839	-0.0612625	0.121533	546
ATRX	NSC95397	-0.0782135	0.0608061	546
ATRX	NVP-231	-0.0619001	0.122157	546
ATRX	NVP-ADW742	-0.0113327	0.833387	546
ATRX	NVP-BEZ235	-0.0765668	0.130906	546
ATRX	NVP-BSK805	0.000553037	0.990594	546
ATRX	NVP-TAE684	-0.0358357	0.487682	546
ATRX	O-6-benzylguanine	0.0168383	0.922975	546
ATRX	OSI-027	-0.036366	0.430814	546
ATRX	OSI-930	-0.0835622	0.0613635	546
ATRX	PAC-1	-0.120159	0.00240156	546
ATRX	PD 153035	0.0635474	0.281844	546
ATRX	PD318088	0.0689994	0.139695	546
ATRX	PDMP	-0.0819535	0.0545932	546
ATRX	PF-184	-0.0994192	0.0119035	546
ATRX	PF-3758309	-0.0641915	0.273377	546
ATRX	PF-4800567 hydrochloride	0.0526286	0.999586	546
ATRX	PF-543	-0.0363749	0.465326	546
ATRX	PF-573228	-0.0398156	0.348562	546
ATRX	PF-750	-0.105746	0.020136	546
ATRX	PHA-793887	-0.0428111	0.279442	546
ATRX	PI-103	-0.037561	0.398082	546
ATRX	PIK-93	-0.0186736	0.691482	546
ATRX	PL-DI	-0.0296953	0.473063	546
ATRX	PLX-4720	0.0080145	0.938835	546
ATRX	PRIMA-1	-0.0870709	0.0291695	546
ATRX	PRIMA-1-Met	0.0201883	0.808316	546
ATRX	PRL-3 inhibitor I	-0.126497	0.161832	546
ATRX	PX-12	-0.0900262	0.0199396	546
ATRX	PYR-41	-0.0336831	0.558405	546
ATRX	QS-11	-0.0789568	0.755441	546
ATRX	QW-BI-011	-0.0322742	0.764477	546
ATRX	R428	-0.080903	0.114435	546
ATRX	RAF265	-0.0999334	0.0530172	546
ATRX	RG-108	-0.075533	0.0877905	546
ATRX	RITA	-0.0294122	0.519522	546
ATRX	RO4929097	0.00245691	0.981017	546
ATRX	Repligen 136	-0.0578526	0.192148	546
ATRX	SB-225002	-0.0980412	0.00955088	546
ATRX	SB-431542	0.00427631	0.979779	546
ATRX	SB-525334	-0.0973132	0.0387176	546
ATRX	SB-743921	-0.0737091	0.0534529	546
ATRX	SCH-529074	-0.0700833	0.137203	546
ATRX	SCH-79797	-0.0304525	0.469063	546
ATRX	SGX-523	-0.0428242	0.487997	546
ATRX	SID 26681509	-0.120731	0.00550754	546
ATRX	SJ-172550	-0.00380931	0.978986	546
ATRX	SKI-II	-0.0702834	0.116186	546
ATRX	SMER-3	-0.0452206	0.3447	546
ATRX	SN-38	-0.046913	0.321161	546
ATRX	SNS-032	0.036684	0.40281	546
ATRX	SNX-2112	-0.00294115	0.94599	546
ATRX	SR-II-138A	-0.0428875	0.267833	546
ATRX	SR1001	-0.013769	0.878172	546
ATRX	SR8278	-0.0140247	0.976514	546
ATRX	SRT-1720	0.0115372	0.829112	546
ATRX	STF-31	-0.119514	0.00269663	546
ATRX	SU11274	-0.135021	0.000643589	546
ATRX	SZ4TA2	-0.0885626	0.40124	546
ATRX	StemRegenin 1	-0.0552248	0.185453	546
ATRX	TG-100-115	-0.0446089	0.414565	546
ATRX	TG-101348	-0.0360929	0.409526	546
ATRX	TGX-221	-0.0263182	0.764917	546
ATRX	TPCA-1	-0.0404618	0.337364	546
ATRX	TW-37	-0.114417	0.00426659	546
ATRX	UNC0321	0.00855618	0.957721	546
ATRX	UNC0638	-0.0557142	0.207975	546
ATRX	VAF-347	0.0146427	0.853539	546
ATRX	VER-155008	0.0135945	0.779561	546
ATRX	VU0155056	-0.0478609	0.881972	546
ATRX	WAY-362450	-0.0275659	0.998521	546
ATRX	WP1130	-0.0946425	0.0193537	546
ATRX	WZ4002	-0.0360138	0.649258	546
ATRX	WZ8040	-0.0641444	0.210932	546
ATRX	XL765	-0.0215421	0.761221	546
ATRX	YK 4-279	-0.0494709	0.214109	546
ATRX	YM-155	-0.116431	0.0103599	546
ATRX	ZSTK474	-0.0425433	0.447121	546
ATRX	abiraterone	-0.039443	0.809758	546
ATRX	afatinib	0.025697	0.629494	546
ATRX	alisertib	-0.0886384	0.0240607	546
ATRX	alvocidib	-0.0500182	0.414033	546
ATRX	apicidin	-0.0634466	0.103076	546
ATRX	austocystin D	0.0284543	0.584262	546
ATRX	avicin D	-0.0934818	0.261301	546
ATRX	avrainvillamide	-0.0701106	0.161585	546
ATRX	axitinib	-0.0982293	0.0119165	546
ATRX	azacitidine	-0.0403705	0.422354	546
ATRX	bafilomycin A1	-0.122844	0.818536	546
ATRX	barasertib	-0.0706166	0.0802113	546
ATRX	bardoxolone methyl	-0.0476554	0.278469	546
ATRX	belinostat	-0.16531	0.00268476	546
ATRX	bendamustine	-0.0701248	0.10618	546
ATRX	betulinic acid	0.0092749	0.969669	546
ATRX	bexarotene	-0.0684958	0.116199	546
ATRX	birinapant	0.0724879	0.226151	546
ATRX	blebbistatin	0.125651	0.845983	546
ATRX	bleomycin A2	0.0302957	0.627134	546
ATRX	bortezomib	-0.0400499	0.342421	546
ATRX	bosutinib	0.0430059	0.319049	546
ATRX	brefeldin A	-0.0627874	0.167616	546
ATRX	brivanib	-0.117905	0.00319299	546
ATRX	cabozantinib	-0.0867686	0.0591782	546
ATRX	canertinib	0.0416896	0.399431	546
ATRX	cediranib	-0.126887	0.190977	546
ATRX	ceranib-2	-0.0754963	0.0511043	546
ATRX	cerulenin	-0.10854	0.00505834	546
ATRX	chlorambucil	-0.107244	0.00617318	546
ATRX	ciclopirox	-0.102442	0.00664715	546
ATRX	ciclosporin	-0.0361271	0.537156	546
ATRX	cimetidine	0.0632126	0.960458	546
ATRX	clofarabine	-0.0286405	0.477895	546
ATRX	crizotinib	-0.0510021	0.212895	546
ATRX	cucurbitacin I	-0.046246	0.286851	546
ATRX	curcumin	-0.0617303	0.121315	546
ATRX	cyanoquinoline 11	0.00584838	0.962987	546
ATRX	cyclophosphamide	-0.0970674	0.993392	546
ATRX	cytarabine hydrochloride	-0.064796	0.0940689	546
ATRX	cytochalasin B	-0.126657	0.00624087	546
ATRX	dabrafenib	-0.0269068	0.761182	546
ATRX	dacarbazine	0.00405955	0.92842	546
ATRX	daporinad	-0.104579	0.0171933	546
ATRX	darinaparsin	-0.0178951	0.823819	546
ATRX	dasatinib	0.0271428	0.617139	546
ATRX	decitabine	-0.0392594	0.323735	546
ATRX	dexamethasone	-0.0758599	0.0737923	546
ATRX	dinaciclib	-0.0357095	0.560247	546
ATRX	docetaxel	-0.0557442	0.382792	546
ATRX	doxorubicin	-0.0802308	0.0347868	546
ATRX	elocalcitol	-0.0647262	0.103681	546
ATRX	entinostat	-0.0488291	0.226677	546
ATRX	epigallocatechin-3-monogallate	-0.0354056	0.475767	546
ATRX	erastin	-0.125324	0.00203358	546
ATRX	erismodegib	-0.0961707	0.149149	546
ATRX	erlotinib	0.0535046	0.250569	546
ATRX	etomoxir	0.0154064	0.980958	546
ATRX	etoposide	-0.0836935	0.030233	546
ATRX	fingolimod	-0.0414229	0.320663	546
ATRX	fluorouracil	-0.0136064	0.752355	546
ATRX	fluvastatin	-0.0576751	0.272753	546
ATRX	foretinib	-0.0811415	0.0546717	546
ATRX	fulvestrant	-0.070566	0.855984	546
ATRX	fumonisin B1	0.0800784	0.13159	546
ATRX	gefitinib	0.0381763	0.493601	546
ATRX	gemcitabine	-0.0919966	0.0230063	546
ATRX	gossypol	-0.0902533	0.0256006	546
ATRX	hyperforin	-0.0396913	0.668975	546
ATRX	ibrutinib	-0.00356843	0.961768	546
ATRX	ifosfamide	-0.0251548	0.922098	546
ATRX	imatinib	-0.0125712	0.8	546
ATRX	importazole	-0.012182	0.877149	546
ATRX	indisulam	-0.0870167	0.0304717	546
ATRX	isoevodiamine	-0.0457704	0.249983	546
ATRX	isoliquiritigenin	-0.122648	0.154745	546
ATRX	isonicotinohydroxamic acid	-0.0384343	0.99255	546
ATRX	istradefylline	-0.00795894	0.971848	546
ATRX	itraconazole	-0.0443075	0.544372	546
ATRX	lapatinib	0.0620701	0.173184	546
ATRX	lenvatinib	-0.116269	0.00563556	546
ATRX	leptomycin B	-0.0210461	0.605001	546
ATRX	linifanib	-0.00591089	0.894932	546
ATRX	linsitinib	-0.00692731	0.894136	546
ATRX	lomeguatrib	-0.000982025	0.989869	546
ATRX	lovastatin	-0.00220697	0.973765	546
ATRX	manumycin A	-0.0840771	0.0297453	546
ATRX	marinopyrrole A	-0.115127	0.0224258	546
ATRX	masitinib	-0.0553379	0.198882	546
ATRX	methotrexate	-0.0429163	0.319655	546
ATRX	methylstat	-0.120192	0.0117728	546
ATRX	mitomycin	-0.0694128	0.0798206	546
ATRX	momelotinib	-0.032283	0.462881	546
ATRX	myricetin	-0.0704856	0.495051	546
ATRX	myriocin	0.0711556	0.884106	546
ATRX	nakiterpiosin	-0.0614144	0.122837	546
ATRX	narciclasine	-0.0313964	0.442825	546
ATRX	navitoclax	-0.0417297	0.358705	546
ATRX	necrostatin-1	-0.0824602	0.0721664	546
ATRX	necrostatin-7	-0.0853681	0.0533575	546
ATRX	necrosulfonamide	-0.121425	0.0101918	546
ATRX	nelarabine	-0.017811	0.961559	546
ATRX	neopeltolide	-0.0199949	0.864866	546
ATRX	neratinib	0.0172205	0.738539	546
ATRX	neuronal differentiation inducer III	-0.0510215	0.202518	546
ATRX	niclosamide	-0.0542451	0.232138	546
ATRX	nilotinib	-0.0623308	0.397999	546
ATRX	nintedanib	-0.0651933	0.216028	546
ATRX	nutlin-3	-0.0731154	0.0755101	546
ATRX	obatoclax	-0.0740753	0.0598013	546
ATRX	olaparib	-0.0816297	0.0430833	546
ATRX	oligomycin A	-0.0730691	0.0712805	546
ATRX	omacetaxine mepesuccinate	-0.00861009	0.870736	546
ATRX	ouabain	-0.0666137	0.0879852	546
ATRX	paclitaxel	-0.0523109	0.196112	546
ATRX	palmostatin B	0.0345633	0.787525	546
ATRX	pandacostat	0.0488833	0.302761	546
ATRX	panobinostat	-0.0667494	0.0850902	546
ATRX	parbendazole	-0.0679887	0.0753226	546
ATRX	parthenolide	-0.0999208	0.0570864	546
ATRX	pazopanib	-0.0839095	0.0367468	546
ATRX	pevonedistat	0.0323895	0.452893	546
ATRX	phloretin	-0.091434	0.020751	546
ATRX	pifithrin-alpha	-0.0646778	0.263468	546
ATRX	pifithrin-mu	-0.0666606	0.101335	546
ATRX	piperlongumine	-0.0821733	0.0324206	546
ATRX	pitstop2	0.00237942	0.992711	546
ATRX	pluripotin	0.00584056	0.930317	546
ATRX	procarbazine	-0.0119819	0.962779	546
ATRX	prochlorperazine	-0.0134835	0.80931	546
ATRX	purmorphamine	-0.0639413	0.17734	546
ATRX	pyrazolanthrone	0.018316	0.760582	546
ATRX	quizartinib	-0.0570877	0.334421	546
ATRX	regorafenib	-0.0463201	0.36802	546
ATRX	rigosertib	-0.0336511	0.422344	546
ATRX	ruxolitinib	-0.0284029	0.542554	546
ATRX	salermide	-0.0559286	0.562758	546
ATRX	saracatinib	0.00665348	0.919467	546
ATRX	selumetinib	0.0805083	0.0858504	546
ATRX	semagacestat	-0.0172102	0.924115	546
ATRX	serdemetan	-0.0435469	0.3054	546
ATRX	sildenafil	-0.0741147	0.510309	546
ATRX	silmitasertib	-0.065854	0.41255	546
ATRX	simvastatin	0.0347333	0.586981	546
ATRX	sirolimus	-0.0915158	0.0207979	546
ATRX	sitagliptin	0.00415657	0.998812	546
ATRX	skepinone-L	-0.152228	0.0119615	546
ATRX	sorafenib	-0.115635	0.00594354	546
ATRX	sotrastaurin	-0.0824327	0.0819354	546
ATRX	spautin-1	-0.0555304	0.255995	546
ATRX	staurosporine	0.0637434	0.64801	546
ATRX	sunitinib	-0.00376575	0.939247	546
ATRX	tacedinaline	-0.0813946	0.0862644	546
ATRX	tacrolimus	-0.0491957	0.272402	546
ATRX	tamatinib	-0.0298807	0.741228	546
ATRX	tamoxifen	-0.0200457	0.806477	546
ATRX	tandutinib	-0.0930085	0.0316136	546
ATRX	tanespimycin	0.0167237	0.786542	546
ATRX	temozolomide	-0.0437163	0.509168	546
ATRX	temsirolimus	-0.0211559	0.775276	546
ATRX	teniposide	-0.0703593	0.210689	546
ATRX	thalidomide	-0.0641224	0.740142	546
ATRX	tigecycline	-0.0447094	0.494413	546
ATRX	tipifarnib-P1	-0.0798298	0.044924	546
ATRX	tipifarnib-P2	0.00403463	0.95101	546
ATRX	tivantinib	-0.153618	0.00642145	546
ATRX	tivozanib	-0.156158	0.000349015	546
ATRX	topotecan	-0.0796166	0.0381056	546
ATRX	tosedostat	-0.0346884	0.453518	546
ATRX	tozasertib	-0.162867	0.337275	546
ATRX	trametinib	0.011079	0.912127	546
ATRX	tretinoin	-0.0182528	0.697178	546
ATRX	triazolothiadiazine	-0.0547141	0.157055	546
ATRX	trifluoperazine	0.00107498	0.988803	546
ATRX	triptolide	-0.0312159	0.457364	546
ATRX	tubastatin A	0.0172044	0.815031	546
ATRX	valdecoxib	-0.118067	0.00302721	546
ATRX	vandetanib	0.0263676	0.651607	546
ATRX	veliparib	-0.0139571	0.888628	546
ATRX	vemurafenib	0.0303726	0.626209	546
ATRX	vincristine	-0.0728261	0.0528726	546
ATRX	vorapaxar	-0.0289234	0.579016	546
ATRX	vorinostat	-0.0432776	0.283266	546
ATRX	zebularine	-0.115437	0.00331094	546
AXL	16-beta-bromoandrosterone	0.173574	0.000124112	558
AXL	1S,3R-RSL-3	0.0614397	0.13902	558
AXL	3-Cl-AHPC	0.261912	1.4158e-12	558
AXL	968	-0.0213702	0.997163	558
AXL	A-804598	-0.0190696	0.923841	558
AXL	AA-COCF3	0.20511	4.04928e-07	558
AXL	ABT-199	0.229686	8.80711e-06	558
AXL	ABT-737	0.253965	4.44426e-10	558
AXL	AC55649	0.0163697	0.922668	558
AXL	AGK-2	0.0277823	0.948122	558
AXL	AM-580	0.122455	0.00907933	558
AXL	AT-406	0.0591166	0.572355	558
AXL	AT13387	0.315178	1.4217e-08	558
AXL	AT7867	0.177093	5.4942e-06	558
AXL	AZ-3146	0.307339	2.34273e-15	558
AXL	AZD1480	0.212951	0.000751645	558
AXL	AZD4547	0.0960801	0.0329249	558
AXL	AZD6482	0.0234274	0.732885	558
AXL	AZD7545	0.154621	0.00016026	558
AXL	AZD7762	0.172122	4.49258e-06	558
AXL	AZD8055	0.19803	3.35347e-07	558
AXL	B02	0.271843	1.42329e-12	558
AXL	BCL-LZH-4	-0.0152109	0.958205	558
AXL	BEC	-0.0422516	0.999979	558
AXL	BI-2536	0.386956	2.742e-28	558
AXL	BIBR-1532	0.212994	4.41625e-07	558
AXL	BIRB-796	0.243057	5.98587e-09	558
AXL	BIX-01294	0.367035	8.74059e-24	558
AXL	BMS-195614	0.0305586	0.660809	558
AXL	BMS-270394	0.157061	0.000189991	558
AXL	BMS-345541	0.344343	2.66113e-20	558
AXL	BMS-536924	0.0972101	0.0459743	558
AXL	BMS-754807	0.222434	2.81254e-08	558
AXL	BRD-A02303741	0.158135	0.00133278	558
AXL	BRD-A05715709	-0.115367	0.429096	558
AXL	BRD-A71883111	0.225405	2.18366e-08	558
AXL	BRD-A86708339	0.42446	1.05693e-14	558
AXL	BRD-A94377914	0.387127	4.54298e-14	558
AXL	BRD-K01737880	0.257407	0.14839	558
AXL	BRD-K02251932	0.188449	4.4116e-05	558
AXL	BRD-K02492147	-0.0934423	0.0935282	558
AXL	BRD-K04800985	0.0202227	0.99881	558
AXL	BRD-K09344309	0.0316812	0.970475	558
AXL	BRD-K09587429	-0.0535118	0.408384	558
AXL	BRD-K11533227	0.239438	5.78578e-09	558
AXL	BRD-K13999467	0.205845	3.15027e-07	558
AXL	BRD-K14844214	0.0926475	0.136947	558
AXL	BRD-K16147474	-0.0187603	0.966918	558
AXL	BRD-K17060750	-0.122134	0.00850808	558
AXL	BRD-K19103580	0.166555	0.000206192	558
AXL	BRD-K24690302	0.232165	4.55859e-09	558
AXL	BRD-K26531177	0.304555	3.09653e-15	558
AXL	BRD-K27224038	0.0982	0.679987	558
AXL	BRD-K27986637	0.145672	0.294792	558
AXL	BRD-K28456706	0.253615	9.31312e-11	558
AXL	BRD-K29086754	0.0253223	0.933147	558
AXL	BRD-K29313308	0.232057	7.0922e-09	558
AXL	BRD-K30019337	0.0787288	0.772008	558
AXL	BRD-K30748066	0.362499	0.0248758	558
AXL	BRD-K33199242	-0.0122426	0.984837	558
AXL	BRD-K33514849	0.106768	0.999288	558
AXL	BRD-K34099515	-0.0719243	0.921804	558
AXL	BRD-K34222889	0.368008	1.26995e-24	558
AXL	BRD-K34485477	-0.0223513	0.998562	558
AXL	BRD-K35604418	0.281422	9.56245e-14	558
AXL	BRD-K37390332	-0.0296739	0.910973	558
AXL	BRD-K41334119	0.024646	0.977935	558
AXL	BRD-K41597374	0.28678	3.64e-14	558
AXL	BRD-K42260513	-0.0872917	0.973398	558
AXL	BRD-K44224150	-0.0302885	0.994574	558
AXL	BRD-K45681478	0.244694	2.45826e-09	558
AXL	BRD-K48334597	0.249178	0.0139992	558
AXL	BRD-K48477130	-0.00765105	0.976762	558
AXL	BRD-K49290616	-0.0485423	0.920189	558
AXL	BRD-K50799972	0.066476	0.322353	558
AXL	BRD-K51490254	0.22193	4.69918e-08	558
AXL	BRD-K51831558	0.139052	0.0398925	558
AXL	BRD-K52037352	0.134787	0.0212458	558
AXL	BRD-K55116708	0.174384	3.064e-05	558
AXL	BRD-K61166597	0.306378	8.36751e-16	558
AXL	BRD-K63431240	0.170221	2.3825e-05	558
AXL	BRD-K64610608	-0.0196389	0.887218	558
AXL	BRD-K66453893	0.369299	1.30378e-24	558
AXL	BRD-K66532283	0.255749	3.04705e-11	558
AXL	BRD-K70511574	0.377101	1.05091e-25	558
AXL	BRD-K71781559	-0.00658285	0.996572	558
AXL	BRD-K75293299	-0.024163	0.94639	558
AXL	BRD-K78574327	-0.0109158	0.993233	558
AXL	BRD-K80183349	0.33671	1.25015e-19	558
AXL	BRD-K84807411	0.0112483	0.981591	558
AXL	BRD-K85133207	0.206668	7.7906e-07	558
AXL	BRD-K86535717	-0.0375616	0.928116	558
AXL	BRD-K88742110	0.26619	1.29423e-11	558
AXL	BRD-K90370028	-0.0145729	0.978141	558
AXL	BRD-K92856060	0.233801	2.32469e-09	558
AXL	BRD-K96431673	-0.0253448	0.996125	558
AXL	BRD-K96970199	0.0604406	0.998764	558
AXL	BRD-K97651142	0.243556	7.5501e-10	558
AXL	BRD-K99006945	-0.136428	0.0485542	558
AXL	BRD-M00053801	0.136393	0.107991	558
AXL	BRD1378	0.029316	0.817046	558
AXL	BRD1812	0.289454	1.95813e-14	558
AXL	BRD1835	0.16515	0.000207541	558
AXL	BRD4132	0.0974093	0.101559	558
AXL	BRD5468	0.0176818	0.877762	558
AXL	BRD6340	0.274109	8.97369e-13	558
AXL	BRD8899	-0.0589778	0.570689	558
AXL	BRD8958	0.0473404	0.982209	558
AXL	BRD9647	0.0876675	0.0689898	558
AXL	BRD9876	0.140595	0.0103648	558
AXL	BYL-719	0.162419	0.00352494	558
AXL	Bax channel blocker	0.283267	3.95977e-12	558
AXL	C6-ceramide	-0.0069994	0.967984	558
AXL	CAL-101	-0.0116553	0.888142	558
AXL	CAY10576	-0.117755	0.0707087	558
AXL	CAY10594	0.167005	0.00166423	558
AXL	CAY10618	0.224531	1.91277e-09	558
AXL	CBB-1007	-0.117309	0.382098	558
AXL	CCT036477	0.215579	9.84779e-09	558
AXL	CD-1530	0.106483	0.0361382	558
AXL	CD-437	0.345272	1.7225e-21	558
AXL	CHIR-99021	0.0680097	0.112561	558
AXL	CHM-1	0.376114	7.65279e-26	558
AXL	CI-976	-0.0159566	0.937837	558
AXL	CID-5951923	-0.0429434	0.63058	558
AXL	CIL41	0.064622	0.368448	558
AXL	CIL55	0.0102064	0.972197	558
AXL	CIL55A	0.20205	0.000404162	558
AXL	CIL56	0.0796118	0.195039	558
AXL	CIL70	0.220277	4.892e-05	558
AXL	COL-3	0.382339	5.57734e-19	558
AXL	CR-1-31B	0.423805	1.58903e-33	558
AXL	Ch-55	0.173735	4.5597e-05	558
AXL	Compound 1541A	0.0816351	0.149701	558
AXL	Compound 23 citrate	0.446709	1.09362e-34	558
AXL	Compound 7d-cis	0.27516	1.26117e-11	558
AXL	DBeQ	0.218138	7.38792e-08	558
AXL	DNMDP	-0.0606354	0.3802	558
AXL	ELCPK	0.327972	2.98942e-09	558
AXL	ETP-46464	0.256173	1.51195e-07	558
AXL	EX-527	0.0169863	0.909994	558
AXL	FGIN-1-27	-0.0594771	0.667385	558
AXL	FQI-1	0.346959	1.88174e-11	558
AXL	FQI-2	0.372287	1.17678e-25	558
AXL	FSC231	0.0423913	0.99945	558
AXL	GANT-61	0.124177	0.0154983	558
AXL	GDC-0879	0.0426289	0.461398	558
AXL	GDC-0941	0.223148	5.81668e-08	558
AXL	GMX-1778	0.201559	1.68234e-07	558
AXL	GSK-3 inhibitor IX	0.148029	0.000281862	558
AXL	GSK-J4	0.509937	0.000210936	558
AXL	GSK1059615	0.0656027	0.802807	558
AXL	GSK2636771	-0.0568229	0.556351	558
AXL	GSK4112	0.183136	3.0377e-05	558
AXL	GSK461364	0.357026	5.47913e-23	558
AXL	GSK525762A	0.319254	1.30121e-18	558
AXL	GW-405833	0.404583	5.61825e-29	558
AXL	GW-843682X	0.332579	2.81888e-18	558
AXL	HBX-41108	0.266915	6.30257e-08	558
AXL	HC-067047	0.114835	0.0325232	558
AXL	HLI 373	0.237412	1.17035e-09	558
AXL	I-BET151	0.361313	4.3997e-24	558
AXL	IC-87114	-0.121332	0.022928	558
AXL	IPR-456	-0.0107222	0.96004	558
AXL	ISOX	0.365561	4.7667e-24	558
AXL	IU1	0.0812197	0.319827	558
AXL	JQ-1	0.375114	1.02292e-25	558
AXL	JW-480	0.0434006	0.811861	558
AXL	JW-55	-0.193753	0.107886	558
AXL	JW-74	0.00480659	0.970466	558
AXL	KH-CB19	-0.0249301	0.841202	558
AXL	KHS101	0.305088	1.15629e-14	558
AXL	KPT185	0.379546	1.84496e-19	558
AXL	KU 0060648	0.290593	2.58891e-14	558
AXL	KU-0063794	0.211489	8.54047e-08	558
AXL	KU-55933	0.175615	1.7085e-05	558
AXL	KU-60019	0.283258	3.66328e-14	558
AXL	KW-2449	0.258003	2.06417e-12	558
AXL	KX2-391	0.400586	5.87815e-29	558
AXL	Ki8751	0.164514	5.4484e-05	558
AXL	Ko-143	0.314858	9.48649e-17	558
AXL	L-685458	0.114158	0.032193	558
AXL	LE-135	0.117911	0.00523893	558
AXL	LRRK2-IN-1	0.443895	7.47536e-26	558
AXL	LY-2157299	-0.013232	0.96933	558
AXL	LY-2183240	0.388698	8.44778e-28	558
AXL	MG-132	0.255282	0.000420409	558
AXL	MGCD-265	0.255232	1.03399e-11	558
AXL	MI-1	0.0273476	0.778688	558
AXL	MI-2	0.292225	1.94693e-06	558
AXL	MK-0752	-0.0296891	0.713649	558
AXL	MK-1775	0.333799	1.45916e-19	558
AXL	MK-2206	0.29556	2.2867e-13	558
AXL	ML006	0.0970926	0.0582604	558
AXL	ML029	0.306147	5.48942e-14	558
AXL	ML031	0.230574	2.21585e-08	558
AXL	ML050	0.211986	1.18182e-07	558
AXL	ML083	-0.0696839	0.52029	558
AXL	ML162	0.0302218	0.51129	558
AXL	ML203	0.0946813	0.0604343	558
AXL	ML210	0.0546799	0.198659	558
AXL	ML239	0.115318	0.00485875	558
AXL	ML258	0.0645657	0.519771	558
AXL	ML311	0.376605	2.50522e-26	558
AXL	ML312	-0.0148918	0.997572	558
AXL	ML320	0.0377594	0.450978	558
AXL	ML334 diastereomer	-0.145963	0.0211756	558
AXL	MLN2238	0.219127	7.1162e-09	558
AXL	MLN2480	0.153456	0.058788	558
AXL	MST-312	0.256131	7.57203e-12	558
AXL	Mdivi-1	0.253194	1.81395e-10	558
AXL	Merck60	0.335959	1.49579e-20	558
AXL	N9-isopropylolomoucine	0.287764	1.22324e-13	558
AXL	NPC-26	0.0445587	0.685076	558
AXL	NSC 74859	0.121477	0.0108489	558
AXL	NSC19630	0.314912	2.14667e-12	558
AXL	NSC23766	0.242087	3.28421e-10	558
AXL	NSC30930	-0.0788755	0.229897	558
AXL	NSC48300	0.259854	2.59027e-12	558
AXL	NSC632839	0.299705	2.8314e-16	558
AXL	NSC95397	0.286694	2.16221e-13	558
AXL	NVP-231	0.324144	9.59901e-19	558
AXL	NVP-ADW742	0.291105	2.92964e-13	558
AXL	NVP-BEZ235	0.269076	1.04864e-08	558
AXL	NVP-BSK805	0.270061	6.94628e-13	558
AXL	NVP-TAE684	0.180404	1.7543e-05	558
AXL	O-6-benzylguanine	0.157796	0.139972	558
AXL	OSI-027	0.177196	9.29109e-06	558
AXL	OSI-930	0.295885	8.24835e-13	558
AXL	PAC-1	0.399036	3.5917e-27	558
AXL	PD 153035	0.0848045	0.131508	558
AXL	PD318088	0.00572157	0.928723	558
AXL	PDMP	0.309718	3.17058e-15	558
AXL	PF-184	0.249865	3.5333e-11	558
AXL	PF-3758309	0.39041	1.11481e-13	558
AXL	PF-4800567 hydrochloride	0.0663469	0.999586	558
AXL	PF-543	0.222608	3.64231e-07	558
AXL	PF-573228	0.291765	5.37104e-15	558
AXL	PF-750	0.209257	1.94091e-06	558
AXL	PHA-793887	0.387115	1.56502e-27	558
AXL	PI-103	0.160797	4.9633e-05	558
AXL	PIK-93	0.215681	4.06558e-08	558
AXL	PL-DI	0.392917	1.20977e-27	558
AXL	PLX-4720	-0.0425054	0.578807	558
AXL	PRIMA-1	0.357488	6.95446e-22	558
AXL	PRIMA-1-Met	0.136192	0.0367952	558
AXL	PRL-3 inhibitor I	-0.00500846	0.978323	558
AXL	PX-12	0.419745	6.23049e-32	558
AXL	PYR-41	0.121815	0.0136984	558
AXL	QS-11	-0.0863174	0.732094	558
AXL	QW-BI-011	0.294276	0.000303377	558
AXL	R428	0.225981	1.54015e-06	558
AXL	RAF265	0.174469	0.00043608	558
AXL	RG-108	0.168965	3.5453e-05	558
AXL	RITA	0.284566	2.10592e-13	558
AXL	RO4929097	0.207782	0.00403503	558
AXL	Repligen 136	0.323409	3.10636e-16	558
AXL	SB-225002	0.351381	4.29617e-23	558
AXL	SB-431542	0.0542293	0.570338	558
AXL	SB-525334	0.216269	8.44485e-07	558
AXL	SB-743921	0.406703	3.47751e-31	558
AXL	SCH-529074	0.262272	3.57061e-10	558
AXL	SCH-79797	0.343719	6.31121e-21	558
AXL	SGX-523	-0.1566	0.0014771	558
AXL	SID 26681509	0.0617869	0.184479	558
AXL	SJ-172550	0.0519239	0.626541	558
AXL	SKI-II	0.177834	1.5954e-05	558
AXL	SMER-3	0.211008	6.03564e-07	558
AXL	SN-38	0.209638	4.89983e-07	558
AXL	SNS-032	0.346597	4.2524e-19	558
AXL	SNX-2112	0.286891	2.29789e-15	558
AXL	SR-II-138A	0.444882	7.59367e-38	558
AXL	SR1001	0.0235002	0.779669	558
AXL	SR8278	0.0872585	0.809913	558
AXL	SRT-1720	0.22493	5.71002e-08	558
AXL	STF-31	0.196505	3.56832e-07	558
AXL	SU11274	0.265429	5.50036e-12	558
AXL	SZ4TA2	-0.0289813	0.840258	558
AXL	StemRegenin 1	0.318634	4.01418e-17	558
AXL	TG-100-115	0.0815944	0.0948198	558
AXL	TG-101348	0.195168	3.865e-07	558
AXL	TGX-221	-0.0634081	0.340428	558
AXL	TPCA-1	0.303136	2.82343e-16	558
AXL	TW-37	0.283253	1.88526e-13	558
AXL	UNC0321	0.0155747	0.91824	558
AXL	UNC0638	0.201161	4.11417e-07	558
AXL	VAF-347	-0.117917	0.0449415	558
AXL	VER-155008	0.170915	2.2484e-05	558
AXL	VU0155056	0.0109766	0.98309	558
AXL	WAY-362450	-0.0155924	0.998521	558
AXL	WP1130	0.282058	1.29633e-13	558
AXL	WZ4002	0.207897	0.000287162	558
AXL	WZ8040	0.213418	2.07006e-06	558
AXL	XL765	0.0523888	0.372131	558
AXL	YK 4-279	0.41303	2.02055e-31	558
AXL	YM-155	0.0333446	0.522974	558
AXL	ZSTK474	0.141118	0.00389728	558
AXL	abiraterone	-0.0907325	0.506513	558
AXL	afatinib	0.196909	2.46337e-06	558
AXL	alisertib	0.277443	6.10619e-14	558
AXL	alvocidib	0.454457	1.56389e-17	558
AXL	apicidin	0.38454	2.35819e-27	558
AXL	austocystin D	0.271293	2.13921e-11	558
AXL	avicin D	-0.0865852	0.307143	558
AXL	avrainvillamide	0.328797	2.13892e-13	558
AXL	axitinib	0.24707	2.64616e-11	558
AXL	azacitidine	0.112945	0.0142785	558
AXL	bafilomycin A1	0.285757	0.486327	558
AXL	barasertib	0.340831	1.81191e-20	558
AXL	bardoxolone methyl	0.327886	1.37731e-16	558
AXL	belinostat	0.509194	2.67395e-24	558
AXL	bendamustine	0.174705	2.2683e-05	558
AXL	betulinic acid	-0.0357412	0.837521	558
AXL	bexarotene	0.17612	2.1244e-05	558
AXL	birinapant	-0.0208782	0.79197	558
AXL	blebbistatin	-0.0356037	0.967056	558
AXL	bleomycin A2	0.0225861	0.728747	558
AXL	bortezomib	0.251216	3.63882e-11	558
AXL	bosutinib	0.185211	2.70583e-06	558
AXL	brefeldin A	0.278908	7.97281e-12	558
AXL	brivanib	0.274131	2.19261e-12	558
AXL	cabozantinib	0.0736439	0.117022	558
AXL	canertinib	0.16078	0.000124565	558
AXL	cediranib	0.13627	0.155815	558
AXL	ceranib-2	0.387005	7.41021e-28	558
AXL	cerulenin	0.364105	1.78083e-23	558
AXL	chlorambucil	0.251018	2.03807e-11	558
AXL	ciclopirox	0.396927	3.42358e-29	558
AXL	ciclosporin	0.155032	0.00140044	558
AXL	cimetidine	0.112698	0.925873	558
AXL	clofarabine	0.2659	2.01943e-13	558
AXL	crizotinib	0.350619	1.20709e-21	558
AXL	cucurbitacin I	0.286908	4.7534e-14	558
AXL	curcumin	0.330891	1.73188e-19	558
AXL	cyanoquinoline 11	0.165913	0.0310891	558
AXL	cyclophosphamide	-0.0171523	0.997412	558
AXL	cytarabine hydrochloride	0.383722	3.61233e-27	558
AXL	cytochalasin B	-0.0316382	0.578231	558
AXL	dabrafenib	0.0594502	0.451372	558
AXL	dacarbazine	0.219355	5.96037e-09	558
AXL	daporinad	0.224739	5.82012e-08	558
AXL	darinaparsin	0.194553	0.000931362	558
AXL	dasatinib	-0.291332	7.10794e-14	558
AXL	decitabine	0.356299	2.28192e-23	558
AXL	dexamethasone	0.138168	0.00083534	558
AXL	dinaciclib	0.506373	3.2496e-23	558
AXL	docetaxel	0.324321	5.28397e-09	558
AXL	doxorubicin	0.364021	6.88687e-25	558
AXL	elocalcitol	0.326921	1.95594e-18	558
AXL	entinostat	0.418055	2.43108e-31	558
AXL	epigallocatechin-3-monogallate	0.213139	3.36708e-07	558
AXL	erastin	0.040796	0.374818	558
AXL	erismodegib	-0.0461928	0.563705	558
AXL	erlotinib	0.0579794	0.208343	558
AXL	etomoxir	0.0565316	0.948445	558
AXL	etoposide	0.304685	4.70795e-17	558
AXL	fingolimod	0.327467	2.76005e-18	558
AXL	fluorouracil	0.321416	2.99784e-18	558
AXL	fluvastatin	-0.103953	0.0288142	558
AXL	foretinib	0.184908	2.90147e-06	558
AXL	fulvestrant	0.0562265	0.895587	558
AXL	fumonisin B1	0.00579592	0.947948	558
AXL	gefitinib	0.162521	0.000140626	558
AXL	gemcitabine	0.339253	3.12006e-19	558
AXL	gossypol	0.333543	1.77072e-18	558
AXL	hyperforin	0.0385257	0.677686	558
AXL	ibrutinib	0.216086	1.4729e-05	558
AXL	ifosfamide	-0.0931676	0.600256	558
AXL	imatinib	0.171961	2.0796e-05	558
AXL	importazole	0.116261	0.0392794	558
AXL	indisulam	0.366641	4.8151e-23	558
AXL	isoevodiamine	0.398509	5.479e-29	558
AXL	isoliquiritigenin	0.308261	0.00011771	558
AXL	isonicotinohydroxamic acid	0.0151303	0.992739	558
AXL	istradefylline	0.126779	0.348786	558
AXL	itraconazole	0.0564712	0.41091	558
AXL	lapatinib	0.258316	6.90679e-11	558
AXL	lenvatinib	0.129902	0.00174762	558
AXL	leptomycin B	0.342888	4.44361e-22	558
AXL	linifanib	0.378594	1.98634e-25	558
AXL	linsitinib	0.286683	6.64792e-13	558
AXL	lomeguatrib	0.0801822	0.131285	558
AXL	lovastatin	-0.19116	4.72424e-06	558
AXL	manumycin A	0.267347	3.63021e-13	558
AXL	marinopyrrole A	0.334625	1.97958e-12	558
AXL	masitinib	0.29064	8.93663e-14	558
AXL	methotrexate	0.137211	0.000698067	558
AXL	methylstat	0.312686	2.71605e-12	558
AXL	mitomycin	0.382176	3.05304e-26	558
AXL	momelotinib	0.169081	1.9233e-05	558
AXL	myricetin	0.0560029	0.594299	558
AXL	myriocin	-0.110462	0.832105	558
AXL	nakiterpiosin	0.357499	5.22844e-23	558
AXL	narciclasine	0.423502	4.92386e-32	558
AXL	navitoclax	0.230305	4.39344e-09	558
AXL	necrostatin-1	0.169163	0.000106951	558
AXL	necrostatin-7	0.206824	7.76091e-07	558
AXL	necrosulfonamide	0.433548	1.55248e-23	558
AXL	nelarabine	0.0167756	0.964901	558
AXL	neopeltolide	0.186341	0.0346137	558
AXL	neratinib	0.190982	1.51811e-06	558
AXL	neuronal differentiation inducer III	0.386671	8.85113e-27	558
AXL	niclosamide	0.0816692	0.0577361	558
AXL	nilotinib	0.111075	0.118582	558
AXL	nintedanib	0.103113	0.0350409	558
AXL	nutlin-3	0.331991	1.04764e-18	558
AXL	obatoclax	0.264811	7.85409e-13	558
AXL	olaparib	0.205682	6.24309e-08	558
AXL	oligomycin A	0.278275	3.22499e-13	558
AXL	omacetaxine mepesuccinate	0.387664	9.44621e-20	558
AXL	ouabain	0.260825	1.31964e-12	558
AXL	paclitaxel	0.319799	2.8294e-18	558
AXL	palmostatin B	0.0591726	0.583625	558
AXL	pandacostat	0.161685	0.000409882	558
AXL	panobinostat	0.472926	1.70788e-42	558
AXL	parbendazole	0.373982	3.00475e-26	558
AXL	parthenolide	0.162178	0.00124546	558
AXL	pazopanib	0.208342	4.56439e-08	558
AXL	pevonedistat	0.19886	2.28715e-07	558
AXL	phloretin	0.308549	1.24136e-16	558
AXL	pifithrin-alpha	0.0234665	0.749433	558
AXL	pifithrin-mu	0.315896	3.07533e-17	558
AXL	piperlongumine	0.406137	2.33955e-30	558
AXL	pitstop2	0.0809304	0.630678	558
AXL	pluripotin	-0.0273492	0.625898	558
AXL	procarbazine	-0.0142953	0.955387	558
AXL	prochlorperazine	0.278741	5.45908e-12	558
AXL	purmorphamine	0.164327	0.000244841	558
AXL	pyrazolanthrone	0.103374	0.0232405	558
AXL	quizartinib	0.0810721	0.143003	558
AXL	regorafenib	0.124644	0.00701031	558
AXL	rigosertib	0.348433	3.12763e-21	558
AXL	ruxolitinib	0.0993214	0.0155894	558
AXL	salermide	0.1001	0.234128	558
AXL	saracatinib	-0.0696916	0.13738	558
AXL	selumetinib	-0.00505945	0.940428	558
AXL	semagacestat	0.00130717	0.996781	558
AXL	serdemetan	0.368425	1.33748e-22	558
AXL	sildenafil	0.051169	0.678574	558
AXL	silmitasertib	0.0494469	0.559763	558
AXL	simvastatin	-0.197017	9.5122e-05	558
AXL	sirolimus	0.2726	4.53086e-13	558
AXL	sitagliptin	-0.0341483	0.997718	558
AXL	skepinone-L	0.335032	6.22868e-09	558
AXL	sorafenib	0.172927	2.791e-05	558
AXL	sotrastaurin	0.410601	2.20346e-21	558
AXL	spautin-1	0.102956	0.0278781	558
AXL	staurosporine	-0.183567	0.0775127	558
AXL	sunitinib	0.231486	1.28728e-09	558
AXL	tacedinaline	0.438191	6.44525e-25	558
AXL	tacrolimus	0.20503	3.20227e-07	558
AXL	tamatinib	-0.0310704	0.730935	558
AXL	tamoxifen	0.155454	0.00637691	558
AXL	tandutinib	0.174272	2.3486e-05	558
AXL	tanespimycin	0.0925042	0.0624997	558
AXL	temozolomide	0.107104	0.068776	558
AXL	temsirolimus	0.227519	6.5699e-05	558
AXL	teniposide	0.318379	4.60659e-10	558
AXL	thalidomide	0.00772205	0.979705	558
AXL	tigecycline	0.167804	0.0035386	558
AXL	tipifarnib-P1	0.332016	7.05462e-19	558
AXL	tipifarnib-P2	0.316633	6.92925e-10	558
AXL	tivantinib	0.443267	1.2656e-17	558
AXL	tivozanib	0.0915119	0.0459701	558
AXL	topotecan	0.330087	2.50688e-20	558
AXL	tosedostat	0.280572	1.97724e-12	558
AXL	tozasertib	0.147032	0.394136	558
AXL	trametinib	-0.0196593	0.837783	558
AXL	tretinoin	0.259568	2.00789e-11	558
AXL	triazolothiadiazine	0.382325	1.68486e-27	558
AXL	trifluoperazine	0.237828	1.10782e-07	558
AXL	triptolide	0.288907	1.28926e-14	558
AXL	tubastatin A	0.252857	7.8421e-06	558
AXL	valdecoxib	0.32003	5.55431e-17	558
AXL	vandetanib	-0.0333331	0.5523	558
AXL	veliparib	0.0727801	0.310971	558
AXL	vemurafenib	-0.0424723	0.470363	558
AXL	vincristine	0.419568	4.93752e-34	558
AXL	vorapaxar	0.143949	0.000925564	558
AXL	vorinostat	0.440433	2.52615e-35	558
AXL	zebularine	0.233228	1.01093e-09	558
BACH2	16-beta-bromoandrosterone	-0.134688	0.00299155	60468
BACH2	1S,3R-RSL-3	-0.125889	0.00136956	60468
BACH2	3-Cl-AHPC	-0.0792613	0.0436063	60468
BACH2	968	-0.121969	0.942706	60468
BACH2	A-804598	-0.0463175	0.780454	60468
BACH2	AA-COCF3	-0.0766018	0.0679214	60468
BACH2	ABT-199	-0.142258	0.00736624	60468
BACH2	ABT-737	-0.167847	5.4853e-05	60468
BACH2	AC55649	-0.0521241	0.669225	60468
BACH2	AGK-2	-0.00776392	0.992693	60468
BACH2	AM-580	-0.0953983	0.0474519	60468
BACH2	AT-406	-0.0126512	0.933465	60468
BACH2	AT13387	-0.126225	0.0307428	60468
BACH2	AT7867	-0.117183	0.0034687	60468
BACH2	AZ-3146	-0.113271	0.00544093	60468
BACH2	AZD1480	-0.133761	0.0460074	60468
BACH2	AZD4547	-0.0755378	0.10336	60468
BACH2	AZD6482	-0.167656	0.000360683	60468
BACH2	AZD7545	-0.00218797	0.968606	60468
BACH2	AZD7762	-0.184649	7.91925e-07	60468
BACH2	AZD8055	-0.151465	0.000108943	60468
BACH2	B02	-0.128391	0.00124079	60468
BACH2	BCL-LZH-4	0.0738548	0.702409	60468
BACH2	BEC	-0.0363358	0.999979	60468
BACH2	BI-2536	-0.163106	9.17796e-06	60468
BACH2	BIBR-1532	-0.0998376	0.0224748	60468
BACH2	BIRB-796	-0.141326	0.00098016	60468
BACH2	BIX-01294	-0.249003	2.7583e-11	60468
BACH2	BMS-195614	-0.0629588	0.293556	60468
BACH2	BMS-270394	-0.0732412	0.104706	60468
BACH2	BMS-345541	-0.108893	0.00539578	60468
BACH2	BMS-536924	-0.0208137	0.74375	60468
BACH2	BMS-754807	-0.102632	0.0166033	60468
BACH2	BRD-A02303741	-0.0841143	0.102793	60468
BACH2	BRD-A05715709	0.020857	0.905189	60468
BACH2	BRD-A71883111	-0.0966442	0.0223183	60468
BACH2	BRD-A86708339	-0.146071	0.0131936	60468
BACH2	BRD-A94377914	-0.249405	2.41372e-06	60468
BACH2	BRD-K01737880	-0.0928367	0.675413	60468
BACH2	BRD-K02251932	-0.138907	0.00285995	60468
BACH2	BRD-K02492147	-0.0344296	0.587117	60468
BACH2	BRD-K04800985	0.00290915	0.999785	60468
BACH2	BRD-K09344309	0.16794	0.619356	60468
BACH2	BRD-K09587429	0.018312	0.81363	60468
BACH2	BRD-K11533227	-0.132265	0.00167487	60468
BACH2	BRD-K13999467	-0.117221	0.00471991	60468
BACH2	BRD-K14844214	-0.0302279	0.712602	60468
BACH2	BRD-K16147474	-0.0669822	0.869369	60468
BACH2	BRD-K17060750	0.0213825	0.715116	60468
BACH2	BRD-K19103580	-0.0705569	0.146515	60468
BACH2	BRD-K24690302	-0.154155	0.000138803	60468
BACH2	BRD-K26531177	-0.200309	3.76962e-07	60468
BACH2	BRD-K27224038	0.01186	0.972163	60468
BACH2	BRD-K27986637	-0.0243215	0.911158	60468
BACH2	BRD-K28456706	-0.174816	1.0839e-05	60468
BACH2	BRD-K29086754	-0.132509	0.437355	60468
BACH2	BRD-K29313308	-0.0731573	0.0880997	60468
BACH2	BRD-K30019337	-0.0891671	0.731954	60468
BACH2	BRD-K30748066	-0.212168	0.217068	60468
BACH2	BRD-K33199242	-0.0195796	0.978379	60468
BACH2	BRD-K33514849	-0.132866	0.999288	60468
BACH2	BRD-K34099515	-0.113206	0.848128	60468
BACH2	BRD-K34222889	-0.233801	2.51933e-10	60468
BACH2	BRD-K34485477	-0.0675685	0.998562	60468
BACH2	BRD-K35604418	-0.172198	8.17407e-06	60468
BACH2	BRD-K37390332	-0.0875933	0.554019	60468
BACH2	BRD-K41334119	-0.0188422	0.985271	60468
BACH2	BRD-K41597374	-0.0858694	0.0335624	60468
BACH2	BRD-K42260513	-0.00092849	0.998533	60468
BACH2	BRD-K44224150	-0.0985028	0.963695	60468
BACH2	BRD-K45681478	-0.0465225	0.321405	60468
BACH2	BRD-K48334597	-0.020493	0.893871	60468
BACH2	BRD-K48477130	-0.0293439	0.894665	60468
BACH2	BRD-K49290616	-0.0910891	0.796036	60468
[truncated: 30,229 more rows]
