# Supplementary material for: Pan-cancer analysis of a novel indicator of necroptosis with its application in human cancer
Source: Aging (Albany NY). 2022 Sep 26;14(18):7587–616. doi: 10.18632/aging.204307 (PMC9550240; doi:10.18632/aging.204307)
Supplement: Supplementary Table 4 [file aging-14-204307-s004.xlsx]

## Sheet: Table S4
Supplementary Table 4. Correlation of GDSC IC50 and necroptosis regulators in pan-cancers.
symbol	drug	cor	fdr	entrez
ALK	(5Z)-7-Oxozeaenol	-0.00247906	0.963111	238
ALK	17-AAG	0.0975011	0.0085297	238
ALK	5-Fluorouracil	-0.199519	9.81612e-09	238
ALK	681640	0.0400734	0.515718	238
ALK	A-443654	0.00377917	0.990953	238
ALK	A-770041	0.13014	0.0633904	238
ALK	AC220	0.00730993	0.910509	238
ALK	AG-014699	-0.0138872	0.77956	238
ALK	AICAR	-0.0487236	0.235574	238
ALK	AKT inhibitor VIII	0.10738	0.0100429	238
ALK	AMG-706	0.0371796	0.558192	238
ALK	AP-24534	0.0574969	0.166137	238
ALK	AR-42	-0.086909	0.0154459	238
ALK	AS601245	0.0773273	0.112647	238
ALK	AS605240	0.0389299	0.387505	238
ALK	AT-7519	-0.11518	0.00109568	238
ALK	ATRA	0.0118192	0.846119	238
ALK	AUY922	0.0709067	0.139967	238
ALK	AZ628	0.077374	0.295018	238
ALK	AZD6482	0.0902513	0.0278411	238
ALK	AZD7762	-0.129211	0.000719467	238
ALK	AZD8055	0.012912	0.773846	238
ALK	Afatinib	0.106083	0.00323777	238
ALK	Axitinib	-0.00792	0.910331	238
ALK	BAY 61-3606	-0.0462434	0.271803	238
ALK	BEZ235	0.069972	0.12684	238
ALK	BHG712	-0.00834889	0.839137	238
ALK	BI-2536	0.0541161	0.617815	238
ALK	BIRB 0796	0.0565953	0.261082	238
ALK	BIX02189	-0.00440197	0.918931	238
ALK	BMS-509744	0.0603792	0.517665	238
ALK	BMS-536924	-0.100098	0.0481112	238
ALK	BMS-708163	0.0780353	0.0473849	238
ALK	BMS-754807	-0.0570161	0.279007	238
ALK	BMS345541	-0.0246017	0.529293	238
ALK	BX-795	0.00225293	0.97167	238
ALK	BX-912	-0.0937176	0.0082691	238
ALK	Belinostat	-0.082153	0.0268482	238
ALK	Bexarotene	0.0924085	0.0899165	238
ALK	Bicalutamide	0.0754605	0.0764438	238
ALK	Bleomycin	0.0117259	0.871593	238
ALK	Bleomycin (50 uM)	0.0386751	0.307781	238
ALK	Bortezomib	0.0798424	0.293884	238
ALK	Bosutinib	0.0809259	0.0831497	238
ALK	Bryostatin 1	0.0956547	0.0381527	238
ALK	CAL-101	-0.00241817	0.957499	238
ALK	CAY10603	-0.10894	0.00214462	238
ALK	CCT007093	0.0577992	0.180503	238
ALK	CCT018159	0.0309637	0.577375	238
ALK	CEP-701	-0.0410652	0.33514	238
ALK	CGP-082996	0.0252794	0.834314	238
ALK	CGP-60474	-0.0585639	0.506127	238
ALK	CH5424802	-0.617255	9.1573e-94	238
ALK	CHIR-99021	0.0479235	0.222162	238
ALK	CI-1040	0.0819068	0.0493442	238
ALK	CMK	-0.0230721	0.871984	238
ALK	CP466722	-0.0640264	0.079228	238
ALK	CP724714	0.0224811	0.723061	238
ALK	CUDC-101	-0.060057	0.108809	238
ALK	CX-5461	-0.15524	1.0747e-05	238
ALK	Camptothecin	-0.0884262	0.0323506	238
ALK	Cetuximab	0.0769817	0.0542534	238
ALK	Cisplatin	-0.0461606	0.356732	238
ALK	Crizotinib	-0.506722	1.27859e-23	238
ALK	Cyclopamine	-0.0106239	0.941055	238
ALK	Cytarabine	0.0204938	0.726393	238
ALK	DMOG	0.00129636	0.98343	238
ALK	Dabrafenib	0.0277123	0.557304	238
ALK	Dasatinib	0.157084	0.010789	238
ALK	Docetaxel	0.0926175	0.0131297	238
ALK	Doxorubicin	-0.0239311	0.743653	238
ALK	EHT 1864	0.0155274	0.857539	238
ALK	EKB-569	0.0315478	0.464346	238
ALK	EX-527	-0.0282076	0.81467	238
ALK	Elesclomol	0.00283005	0.95865	238
ALK	Embelin	0.0751807	0.143526	238
ALK	Epothilone B	0.0794498	0.093699	238
ALK	Erlotinib	0.075944	0.299035	238
ALK	Etoposide	-0.0562174	0.22538	238
ALK	FH535	0.118298	0.00464406	238
ALK	FK866	-0.101542	0.00473456	238
ALK	FMK	0.0570808	0.372497	238
ALK	FR-180204	0.00183929	0.981841	238
ALK	FTI-277	0.062234	0.133646	238
ALK	Foretinib	-0.0652424	0.107534	238
ALK	GDC0449	0.0284447	0.800766	238
ALK	GDC0941	0.0345907	0.562523	238
ALK	GNF-2	0.0587674	0.800287	238
ALK	GSK-650394	0.0795247	0.188765	238
ALK	GSK1070916	-0.0714717	0.0545398	238
ALK	GSK1904529A	0.0794562	0.0686243	238
ALK	GSK2126458	-0.0271781	0.502438	238
ALK	GSK269962A	-0.0237499	0.692565	238
ALK	GSK429286A	-0.118202	0.00184423	238
ALK	GSK690693	-0.0255983	0.523551	238
ALK	GW 441756	0.0291152	0.896458	238
ALK	GW-2580	-0.0110961	0.992016	238
ALK	GW843682X	0.0310035	0.764345	238
ALK	Gefitinib	0.0911341	0.0231494	238
ALK	Gemcitabine	-0.0199532	0.72527	238
ALK	Genentech Cpd 10	-0.0856846	0.0191982	238
ALK	HG-5-113-01	-0.231295	7.5325e-05	238
ALK	HG-5-88-01	-0.470436	1.9735e-24	238
ALK	HG-6-64-1	0.124559	0.00219477	238
ALK	I-BET-762	-0.0119457	0.760624	238
ALK	IOX2	0.0487724	0.389539	238
ALK	IPA-3	-0.0413274	0.315819	238
ALK	Imatinib	0.0585266	0.703567	238
ALK	Ispinesib Mesylate	-0.072866	0.0478024	238
ALK	JNJ-26854165	0.0282094	0.618758	238
ALK	JNK Inhibitor VIII	0.0519748	0.227881	238
ALK	JNK-9L	-0.0192739	0.778133	238
ALK	JQ1	0.0754552	0.0664497	238
ALK	JQ12	0.046803	0.389598	238
ALK	JW-7-24-1	-0.111483	0.00161219	238
ALK	JW-7-52-1	0.0906681	0.307644	238
ALK	KIN001-055	0.05449	0.348366	238
ALK	KIN001-102	-0.0264729	0.49064	238
ALK	KIN001-135	0.00266285	0.987504	238
ALK	KIN001-236	-0.0317819	0.420891	238
ALK	KIN001-244	-0.0724248	0.0500241	238
ALK	KIN001-260	-0.127441	0.000327407	238
ALK	KIN001-266	-0.0740123	0.100114	238
ALK	KIN001-270	-0.0937182	0.0137088	238
ALK	KU-55933	0.0326418	0.623183	238
ALK	LAQ824	-0.0266301	0.535221	238
ALK	LFM-A13	0.0286905	0.60711	238
ALK	LY317615	0.0422968	0.347081	238
ALK	Lapatinib	0.101277	0.105668	238
ALK	Lenalidomide	0.0359342	0.650242	238
ALK	Linifanib	0.00597768	0.932582	238
ALK	Lisitinib	-0.0756724	0.167763	238
ALK	MG-132	0.0573774	0.530444	238
ALK	MK-2206	0.0423418	0.421325	238
ALK	MLN4924	0.0369007	0.537185	238
ALK	MP470	-0.0447876	0.309417	238
ALK	MPS-1-IN-1	-0.475588	1.39906e-50	238
ALK	MS-275	-0.0978278	0.196648	238
ALK	Masitinib	-0.109862	0.00260537	238
ALK	Methotrexate	-0.157147	1.3091e-05	238
ALK	Midostaurin	0.12146	0.0027103	238
ALK	Mitomycin C	-0.0616322	0.205772	238
ALK	NG-25	-0.0298491	0.439166	238
ALK	NPK76-II-72-1	-0.0680471	0.057261	238
ALK	NSC-207895	-0.0273521	0.582142	238
ALK	NSC-87877	-0.0238396	0.70432	238
ALK	NU-7441	0.0420731	0.563831	238
ALK	Navitoclax	-0.0923281	0.0130249	238
ALK	Nilotinib	0.0310836	0.577861	238
ALK	Nutlin-3a (-)	-0.0671021	0.140226	238
ALK	OSI-027	-0.0976973	0.00646086	238
ALK	OSI-930	-0.0322639	0.43598	238
ALK	OSU-03012	0.00874144	0.892206	238
ALK	Obatoclax Mesylate	0.0169036	0.762452	238
ALK	Olaparib	-0.0143695	0.775792	238
ALK	PAC-1	0.00384155	0.943189	238
ALK	PD-0325901	0.106918	0.00568663	238
ALK	PD-0332991	-0.0168041	0.80717	238
ALK	PD-173074	0.0486457	0.731062	238
ALK	PF-4708671	0.0432437	0.656558	238
ALK	PF-562271	0.0547507	0.312035	238
ALK	PFI-1	0.0595596	0.199406	238
ALK	PHA-665752	0.036408	0.820483	238
ALK	PHA-793887	-0.134003	0.000112226	238
ALK	PI-103	-0.0870249	0.0159858	238
ALK	PIK-93	-0.0454014	0.216997	238
ALK	PLX4720	0.0184651	0.689659	238
ALK	Paclitaxel	0.0509837	0.662026	238
ALK	Parthenolide	-0.0374822	0.746494	238
ALK	Pazopanib	0.0646718	0.209479	238
ALK	Phenformin	0.00940576	0.824698	238
ALK	Pyrimethamine	-0.0100536	0.948557	238
ALK	QL-VIII-58	0.0271911	0.766329	238
ALK	QL-X-138	-0.110021	0.00225733	238
ALK	QL-XI-92	-0.102841	0.0040381	238
ALK	QL-XII-47	-0.0758035	0.0523016	238
ALK	QL-XII-61	-0.0679329	0.3024	238
ALK	QS11	0.00141865	0.986785	238
ALK	RDEA119	0.0868313	0.0168342	238
ALK	RO-3306	0.0718667	0.0843178	238
ALK	Rapamycin	0.0383503	0.779832	238
ALK	Roscovitine	-0.0745785	0.630576	238
ALK	Ruxolitinib	-0.0477514	0.342526	238
ALK	S-Trityl-L-cysteine	0.0236689	0.810018	238
ALK	SB 216763	0.0459976	0.362079	238
ALK	SB 505124	-0.0737655	0.24887	238
ALK	SB52334	-0.124152	0.00169907	238
ALK	SB590885	0.00259538	0.964819	238
ALK	SGC0946	0.0359569	0.519824	238
ALK	SL 0101-1	0.0636554	0.382723	238
ALK	SN-38	-0.0580366	0.17889	238
ALK	SNX-2112	-0.0717118	0.0512205	238
ALK	STF-62247	-0.11217	0.00350189	238
ALK	Salubrinal	0.105889	0.17875	238
ALK	Saracatinib	0.0836354	0.301705	238
ALK	Shikonin	-0.0555019	0.27988	238
ALK	Sorafenib	0.0559415	0.617917	238
ALK	Sunitinib	-0.0290348	0.737238	238
ALK	T0901317	-0.0296568	0.501345	238
ALK	TAE684	-0.488658	1.65708e-21	238
ALK	TAK-715	-0.035621	0.354921	238
ALK	TG101348	-0.0691187	0.0568983	238
ALK	TGX221	0.11354	0.0692736	238
ALK	THZ-2-102-1	-0.0872833	0.0158374	238
ALK	THZ-2-49	-0.0445832	0.243824	238
ALK	TL-1-85	-0.0242247	0.538814	238
ALK	TL-2-105	0.0196608	0.632492	238
ALK	TPCA-1	-0.0623769	0.0846004	238
ALK	TW 37	-0.0115043	0.840569	238
ALK	Talazoparib	-0.123951	0.00181673	238
ALK	Tamoxifen	-0.0165948	0.91174	238
ALK	Temozolomide	-0.112181	0.019702	238
ALK	Temsirolimus	0.0447362	0.375983	238
ALK	Thapsigargin	0.0433492	0.501623	238
ALK	Tipifarnib	0.073601	0.191247	238
ALK	Tivozanib	0.00928958	0.904804	238
ALK	Trametinib	0.112331	0.0019785	238
ALK	Tubastatin A	-0.0736349	0.0411793	238
ALK	UNC0638	-0.119801	0.000535417	238
ALK	UNC1215	0.0542774	0.270865	238
ALK	VNLG/124	4.3351e-05	0.999665	238
ALK	VX-11e	0.0256725	0.631149	238
ALK	VX-680	-0.00385317	0.979079	238
ALK	VX-702	0.0212608	0.934716	238
ALK	Veliparib	0.064318	0.315505	238
ALK	Vinblastine	-0.0526445	0.235775	238
ALK	Vinorelbine	0.0305397	0.611769	238
ALK	Vorinostat	-0.118057	0.00116465	238
ALK	WH-4-023	0.124912	0.072998	238
ALK	WZ-1-84	0.118939	0.0942651	238
ALK	WZ3105	-0.0745244	0.0384042	238
ALK	XAV939	0.0972154	0.0105103	238
ALK	XL-184	0.0272947	0.594333	238
ALK	XMD11-85h	-0.0277179	0.890195	238
ALK	XMD13-2	-0.167274	1.46312e-06	238
ALK	XMD14-99	-0.424313	2.99666e-39	238
ALK	XMD15-27	-0.268132	1.46819e-13	238
ALK	XMD8-85	0.100971	0.178688	238
ALK	XMD8-92	-0.0124853	0.935649	238
ALK	Y-39983	-0.140928	8.1685e-05	238
ALK	YK 4-279	-0.0442888	0.418418	238
ALK	YM155	-0.0391582	0.464842	238
ALK	YM201636	-0.0725078	0.0494768	238
ALK	Z-LLNle-CHO	-0.0089705	0.924743	238
ALK	ZG-10	-0.103055	0.0912612	238
ALK	ZM-447439	-0.030576	0.54676	238
ALK	ZSTK474	-0.027142	0.489687	238
ALK	Zibotentan	0.00624544	0.990687	238
ALK	piperlongumine	0.0213369	0.667599	238
ALK	rTRAIL	0.0348027	0.651562	238
ALK	selumetinib	0.080899	0.0276432	238
APP	(5Z)-7-Oxozeaenol	-0.076919	0.0520042	351
APP	17-AAG	-0.307443	1.01757e-18	351
APP	5-Fluorouracil	0.290828	0	351
APP	681640	-0.0672854	0.240126	351
APP	A-443654	0.0809938	0.596197	351
APP	A-770041	0.0642168	0.429921	351
APP	AC220	0.127457	0.00151903	351
APP	AG-014699	-0.199545	2.35124e-07	351
APP	AICAR	0.280657	0	351
APP	AKT inhibitor VIII	-0.150807	0.000201859	351
APP	AMG-706	-0.146722	0.00201895	351
APP	AP-24534	0.240449	2.61535e-11	351
APP	AR-42	0.368018	0	351
APP	AS601245	-0.077451	0.112128	351
APP	AS605240	0.138717	0.000294504	351
APP	AT-7519	0.399638	0	351
APP	ATRA	0.159639	7.6109e-05	351
APP	AUY922	0.0267644	0.648127	351
APP	AZ628	-0.0621103	0.418859	351
APP	AZD6482	0.00161376	0.980769	351
APP	AZD7762	0.289493	0	351
APP	AZD8055	0.297781	0	351
APP	Afatinib	-0.179458	2.28425e-07	351
APP	Axitinib	0.0372591	0.499511	351
APP	BAY 61-3606	0.243882	3.7058e-11	351
APP	BEZ235	0.018911	0.738959	351
APP	BHG712	0.341274	0	351
APP	BI-2536	0.0911217	0.334402	351
APP	BIRB 0796	-0.163523	0.00031548	351
APP	BIX02189	0.352318	0	351
APP	BMS-509744	-0.107524	0.20745	351
APP	BMS-536924	-0.0326406	0.66203	351
APP	BMS-708163	-0.194713	3.31985e-07	351
APP	BMS-754807	-0.142623	0.00129659	351
APP	BMS345541	0.350659	0	351
APP	BX-795	0.128403	0.00146915	351
APP	BX-912	0.361818	0	351
APP	Belinostat	0.326901	0	351
APP	Bexarotene	-0.0585625	0.365804	351
APP	Bicalutamide	-0.140797	0.000457926	351
APP	Bleomycin	-0.0199683	0.759787	351
APP	Bleomycin (50 uM)	-0.227038	4.88786e-11	351
APP	Bortezomib	0.0264815	0.781643	351
APP	Bosutinib	0.0993251	0.0267523	351
APP	Bryostatin 1	-0.126208	0.0050118	351
APP	CAL-101	0.293176	0	351
APP	CAY10603	0.376032	0	351
APP	CCT007093	-0.143601	0.000290623	351
APP	CCT018159	-0.0249551	0.663965	351
APP	CEP-701	0.269192	1.08396e-13	351
APP	CGP-082996	0.0355302	0.746768	351
APP	CGP-60474	0.0996168	0.194501	351
APP	CH5424802	0.117536	0.00810062	351
APP	CHIR-99021	-0.110367	0.00254756	351
APP	CI-1040	-0.0767627	0.0676769	351
APP	CMK	0.100436	0.321167	351
APP	CP466722	0.360638	0	351
APP	CP724714	-0.0788875	0.0941412	351
APP	CUDC-101	0.357745	0	351
APP	CX-5461	0.261751	2.62123e-14	351
APP	Camptothecin	0.153762	7.6624e-05	351
APP	Cetuximab	-0.172141	4.16579e-06	351
APP	Cisplatin	-0.080277	0.0811681	351
APP	Crizotinib	0.0382278	0.814924	351
APP	Cyclopamine	0.1136	0.200294	351
APP	Cytarabine	0.011696	0.849531	351
APP	DMOG	0.251017	1.21844e-11	351
APP	Dabrafenib	-0.0640065	0.130334	351
APP	Dasatinib	-0.0762202	0.258955	351
APP	Docetaxel	-0.267129	6.98397e-14	351
APP	Doxorubicin	0.036959	0.578762	351
APP	EHT 1864	-0.0514571	0.409279	351
APP	EKB-569	0.195956	6.10737e-08	351
APP	EX-527	-0.0613663	0.516632	351
APP	Elesclomol	-0.0932099	0.025898	351
APP	Embelin	-0.000222287	0.998118	351
APP	Epothilone B	-0.0669665	0.169105	351
APP	Erlotinib	-0.134696	0.0483602	351
APP	Etoposide	0.118728	0.00420609	351
APP	FH535	-0.0822166	0.0615033	351
APP	FK866	0.269667	0	351
APP	FMK	0.11969	0.0194254	351
APP	FR-180204	0.0545859	0.276475	351
APP	FTI-277	-0.160206	3.3761e-05	351
APP	Foretinib	0.175107	1.53728e-06	351
APP	GDC0449	0.0648965	0.443378	351
APP	GDC0941	0.0434447	0.441348	351
APP	GNF-2	-0.0496116	0.837318	351
APP	GSK-650394	0.0133232	0.890964	351
APP	GSK1070916	0.276088	0	351
APP	GSK1904529A	-0.175719	1.5843e-05	351
APP	GSK2126458	0.272039	0	351
APP	GSK269962A	0.0105881	0.874151	351
APP	GSK429286A	0.163024	9.97503e-06	351
APP	GSK690693	0.300077	0	351
APP	GW 441756	0.010301	0.977685	351
APP	GW-2580	-0.0485186	0.851043	351
APP	GW843682X	0.146374	0.0475709	351
APP	Gefitinib	-0.138079	0.000359968	351
APP	Gemcitabine	0.113613	0.00835813	351
APP	Genentech Cpd 10	0.29515	0	351
APP	HG-5-113-01	0.0902439	0.169374	351
APP	HG-5-88-01	-0.0167205	0.933059	351
APP	HG-6-64-1	0.0966338	0.0225687	351
APP	I-BET-762	0.488164	0	351
APP	IOX2	-0.0464375	0.418837	351
APP	IPA-3	0.273522	2.59106e-14	351
APP	Imatinib	0.0405422	0.816016	351
APP	Ispinesib Mesylate	0.305298	0	351
APP	JNJ-26854165	-0.0210365	0.72144	351
APP	JNK Inhibitor VIII	-0.202309	1.54071e-07	351
APP	JNK-9L	0.0863526	0.0763549	351
APP	JQ1	0.149592	9.5849e-05	351
APP	JQ12	0.127798	0.00544312	351
APP	JW-7-24-1	0.376271	0	351
APP	JW-7-52-1	0.0477779	0.65584	351
APP	KIN001-055	-0.0241177	0.747396	351
APP	KIN001-102	0.347678	0	351
APP	KIN001-135	-0.160483	0.0584785	351
APP	KIN001-236	0.337004	0	351
APP	KIN001-244	0.301463	0	351
APP	KIN001-260	0.391141	0	351
APP	KIN001-266	0.149917	0.000369266	351
APP	KIN001-270	0.264144	1.43215e-13	351
APP	KU-55933	0.116233	0.0152939	351
APP	LAQ824	0.265258	1.87543e-13	351
APP	LFM-A13	-0.118991	0.00785778	351
APP	LY317615	0.180162	1.93657e-06	351
APP	Lapatinib	-0.184405	0.00171754	351
APP	Lenalidomide	0.0804396	0.175588	351
APP	Linifanib	0.0779028	0.0867522	351
APP	Lisitinib	-0.0803051	0.135418	351
APP	MG-132	0.00905671	0.942572	351
APP	MK-2206	0.132798	0.00297694	351
APP	MLN4924	-0.0962699	0.0610017	351
APP	MP470	0.112398	0.00681512	351
APP	MPS-1-IN-1	0.209933	2.61932e-09	351
APP	MS-275	0.199144	0.00371477	351
APP	Masitinib	0.234547	1.50921e-11	351
APP	Methotrexate	0.442211	0	351
APP	Midostaurin	-0.110071	0.00717178	351
APP	Mitomycin C	0.106651	0.0157981	351
APP	NG-25	0.384798	0	351
APP	NPK76-II-72-1	0.411299	0	351
APP	NSC-207895	0.10942	0.00648419	351
APP	NSC-87877	-0.150624	0.00369359	351
APP	NU-7441	0.0102681	0.921776	351
APP	Navitoclax	0.292911	0	351
APP	Nilotinib	0.112047	0.0105423	351
APP	Nutlin-3a (-)	0.0414004	0.404093	351
APP	OSI-027	0.340631	0	351
APP	OSI-930	0.212114	2.24536e-09	351
APP	OSU-03012	0.107111	0.0136049	351
APP	Obatoclax Mesylate	0.15378	0.000137418	351
APP	Olaparib	-0.11604	0.00398403	351
APP	PAC-1	0.250164	9.99399e-12	351
APP	PD-0325901	-0.210935	1.06936e-08	351
APP	PD-0332991	0.0431341	0.44377	351
APP	PD-173074	-0.0165635	0.930364	351
APP	PF-4708671	-0.0552308	0.540581	351
APP	PF-562271	-0.0641436	0.224609	351
APP	PFI-1	0.116085	0.00586452	351
APP	PHA-665752	-0.101251	0.423809	351
APP	PHA-793887	0.430863	0	351
APP	PI-103	0.333295	0	351
APP	PIK-93	0.420433	0	351
APP	PLX4720	-0.0943067	0.0153244	351
APP	Paclitaxel	0.0222044	0.880133	351
APP	Parthenolide	0.0949866	0.313154	351
APP	Pazopanib	-0.075456	0.131913	351
APP	Phenformin	0.304766	0	351
APP	Pyrimethamine	0.152644	0.11651	351
APP	QL-VIII-58	0.00186093	0.987809	351
APP	QL-X-138	0.327484	0	351
APP	QL-XI-92	0.323259	0	351
APP	QL-XII-47	0.204492	1.64532e-08	351
APP	QL-XII-61	0.299413	8.27174e-09	351
APP	QS11	0.0320494	0.631845	351
APP	RDEA119	-0.213903	3.71976e-10	351
APP	RO-3306	-0.159962	5.0748e-05	351
APP	Rapamycin	0.0895547	0.390616	351
APP	Roscovitine	0.0333745	0.870523	351
APP	Ruxolitinib	0.257536	5.52759e-13	351
APP	S-Trityl-L-cysteine	0.155586	0.0276587	351
APP	SB 216763	-0.139231	0.00204804	351
APP	SB 505124	-0.0624264	0.355066	351
APP	SB52334	-0.0233204	0.668487	351
APP	SB590885	-0.0933756	0.0385671	351
APP	SGC0946	-0.156454	0.000324017	351
APP	SL 0101-1	-0.119693	0.119266	351
APP	SN-38	0.0656549	0.12144	351
APP	SNX-2112	0.381066	0	351
APP	STF-62247	0.272093	0	351
APP	Salubrinal	0.186636	0.00993904	351
APP	Saracatinib	-0.080833	0.320977	351
APP	Shikonin	0.0732548	0.133242	351
APP	Sorafenib	0.0632151	0.555827	351
APP	Sunitinib	0.157336	0.0142033	351
APP	T0901317	0.272515	0	351
APP	TAE684	-0.0951971	0.318803	351
APP	TAK-715	0.314168	0	351
APP	TG101348	0.371397	0	351
APP	TGX221	-0.153746	0.0109747	351
APP	THZ-2-102-1	0.352827	0	351
APP	THZ-2-49	0.321289	0	351
APP	TL-1-85	0.362199	0	351
APP	TL-2-105	0.220833	2.29206e-10	351
APP	TPCA-1	0.424987	0	351
APP	TW 37	0.0407984	0.393172	351
APP	Talazoparib	-0.0323688	0.500728	351
APP	Tamoxifen	0.0229923	0.867653	351
APP	Temozolomide	0.0554839	0.393899	351
APP	Temsirolimus	0.167409	2.8444e-05	351
APP	Thapsigargin	0.000897268	0.992988	351
APP	Tipifarnib	0.0517713	0.408096	351
APP	Tivozanib	0.0561548	0.299146	351
APP	Trametinib	-0.255357	1.47291e-13	351
APP	Tubastatin A	0.357699	0	351
APP	UNC0638	0.312583	0	351
APP	UNC1215	-0.165294	0.000248788	351
APP	VNLG/124	0.16245	1.0846e-05	351
APP	VX-11e	0.0537682	0.248892	351
APP	VX-680	0.08693	0.323876	351
APP	VX-702	0.0486207	0.797163	351
APP	Veliparib	-0.0946905	0.120514	351
APP	Vinblastine	0.18955	9.28764e-07	351
APP	Vinorelbine	0.0950708	0.0465946	351
APP	Vorinostat	0.394481	0	351
APP	WH-4-023	-0.0540463	0.505353	351
APP	WZ-1-84	-0.103167	0.156066	351
APP	WZ3105	0.357716	0	351
APP	XAV939	-0.158168	1.7014e-05	351
APP	XL-184	0.138888	0.000420801	351
APP	XMD11-85h	0.0954408	0.465726	351
APP	XMD13-2	0.361411	0	351
APP	XMD14-99	0.249075	8.14842e-13	351
APP	XMD15-27	0.13138	0.00116233	351
APP	XMD8-85	0.109422	0.1392	351
APP	XMD8-92	0.0982864	0.268106	351
APP	Y-39983	0.303282	0	351
APP	YK 4-279	0.00303702	0.969906	351
APP	YM155	0.116089	0.00749035	351
APP	YM201636	0.297496	0	351
APP	Z-LLNle-CHO	0.176296	0.00468543	351
APP	ZG-10	0.135933	0.0193325	351
APP	ZM-447439	0.135687	0.000871347	351
APP	ZSTK474	0.335469	0	351
APP	Zibotentan	0.00682439	0.989086	351
APP	piperlongumine	-0.10279	0.00974638	351
APP	rTRAIL	-0.0795389	0.20201	351
APP	selumetinib	-0.202016	4.07543e-09	351
ATRX	(5Z)-7-Oxozeaenol	0.0365809	0.406566	546
ATRX	17-AAG	0.182351	3.98546e-07	546
ATRX	5-Fluorouracil	-0.104664	0.00366647	546
ATRX	681640	0.106191	0.0515261	546
ATRX	A-443654	-0.0141484	0.957058	546
ATRX	A-770041	0.0262551	0.784762	546
ATRX	AC220	-0.0419035	0.391272	546
ATRX	AG-014699	-0.023956	0.609815	546
ATRX	AICAR	-0.0565411	0.162931	546
ATRX	AKT inhibitor VIII	0.0279573	0.571098	546
ATRX	AMG-706	0.0422007	0.491649	546
ATRX	AP-24534	-0.0640243	0.118783	546
ATRX	AR-42	-0.192461	2.66316e-08	546
ATRX	AS601245	0.0769639	0.114694	546
ATRX	AS605240	-0.00343068	0.951889	546
ATRX	AT-7519	-0.121637	0.000547952	546
ATRX	ATRA	0.0446393	0.370318	546
ATRX	AUY922	0.0319796	0.574122	546
ATRX	AZ628	0.0766186	0.29976	546
ATRX	AZD6482	0.00933545	0.879005	546
ATRX	AZD7762	-0.0661415	0.101487	546
ATRX	AZD8055	-0.0694508	0.0795588	546
ATRX	Afatinib	0.102585	0.00451722	546
ATRX	Axitinib	-0.0417521	0.43836	546
ATRX	BAY 61-3606	-0.0807344	0.0435756	546
ATRX	BEZ235	0.00119713	0.985859	546
ATRX	BHG712	-0.080653	0.0262847	546
ATRX	BI-2536	-0.0837047	0.384045	546
ATRX	BIRB 0796	0.0508981	0.321013	546
ATRX	BIX02189	-0.121461	0.000655473	546
ATRX	BMS-509744	-0.0343656	0.736073	546
ATRX	BMS-536924	-0.0388838	0.577898	546
ATRX	BMS-708163	0.0693455	0.0808654	546
ATRX	BMS-754807	-0.0209354	0.738521	546
ATRX	BMS345541	-0.116419	0.000992761	546
ATRX	BX-795	-0.0925007	0.0277231	546
ATRX	BX-912	-0.204918	1.95483e-09	546
ATRX	Belinostat	-0.162488	5.33247e-06	546
ATRX	Bexarotene	0.0341811	0.666548	546
ATRX	Bicalutamide	0.0507848	0.254043	546
ATRX	Bleomycin	0.0344746	0.560767	546
ATRX	Bleomycin (50 uM)	0.00363599	0.930664	546
ATRX	Bortezomib	-0.00781672	0.943387	546
ATRX	Bosutinib	0.0166583	0.798683	546
ATRX	Bryostatin 1	0.0518739	0.311711	546
ATRX	CAL-101	-0.119665	0.000974224	546
ATRX	CAY10603	-0.190112	3.69073e-08	546
ATRX	CCT007093	0.103505	0.0105321	546
ATRX	CCT018159	0.0258514	0.650265	546
ATRX	CEP-701	-0.0683848	0.0916819	546
ATRX	CGP-082996	0.105293	0.198741	546
ATRX	CGP-60474	-0.0349073	0.719028	546
ATRX	CH5424802	-0.00468145	0.956257	546
ATRX	CHIR-99021	-0.0450858	0.253224	546
ATRX	CI-1040	0.150138	0.000116956	546
ATRX	CMK	-0.0650605	0.567114	546
ATRX	CP466722	-0.163046	2.64127e-06	546
ATRX	CP724714	0.0375367	0.503671	546
ATRX	CUDC-101	-0.154339	1.3852e-05	546
ATRX	CX-5461	-0.156758	8.72849e-06	546
ATRX	Camptothecin	-0.116502	0.00351661	546
ATRX	Cetuximab	0.0409847	0.332287	546
ATRX	Cisplatin	-0.0514948	0.296463	546
ATRX	Crizotinib	0.00700228	0.97729	546
ATRX	Cyclopamine	0.00749933	0.96012	546
ATRX	Cytarabine	-0.0492682	0.328749	546
ATRX	DMOG	-0.0960451	0.0199354	546
ATRX	Dabrafenib	0.102513	0.0100127	546
ATRX	Dasatinib	0.0793887	0.236529	546
ATRX	Docetaxel	0.0876546	0.0192224	546
ATRX	Doxorubicin	0.00795862	0.924505	546
ATRX	EHT 1864	0.0515557	0.407991	546
ATRX	EKB-569	-0.00750839	0.877319	546
ATRX	EX-527	0.060193	0.528661	546
ATRX	Elesclomol	-0.0146142	0.778554	546
ATRX	Embelin	0.0406542	0.500762	546
ATRX	Epothilone B	0.0364733	0.494727	546
ATRX	Erlotinib	0.133617	0.0504019	546
ATRX	Etoposide	-0.0638336	0.158714	546
ATRX	FH535	0.0745361	0.0956001	546
ATRX	FK866	-0.237408	5.30586e-12	546
ATRX	FMK	-0.0387059	0.580708	546
ATRX	FR-180204	-0.0197911	0.749239	546
ATRX	FTI-277	0.0953449	0.0172162	546
ATRX	Foretinib	-0.149082	5.213e-05	546
ATRX	GDC0449	0.0163036	0.899794	546
ATRX	GDC0941	-0.0559145	0.289419	546
ATRX	GNF-2	0.104782	0.534926	546
ATRX	GSK-650394	-0.00154207	0.987347	546
ATRX	GSK1070916	-0.193662	2.98541e-08	546
ATRX	GSK1904529A	0.00984517	0.860665	546
ATRX	GSK2126458	-0.106021	0.00371856	546
ATRX	GSK269962A	-0.0496445	0.326792	546
ATRX	GSK429286A	-0.164057	8.65918e-06	546
ATRX	GSK690693	-0.110728	0.00211866	546
ATRX	GW 441756	-0.0338327	0.872332	546
ATRX	GW-2580	-0.0958571	0.209258	546
ATRX	GW843682X	-0.0678973	0.43975	546
ATRX	Gefitinib	0.0966382	0.0154586	546
ATRX	Gemcitabine	-0.00909113	0.88322	546
ATRX	Genentech Cpd 10	-0.164788	2.58154e-06	546
ATRX	HG-5-113-01	-0.140099	0.0216066	546
ATRX	HG-5-88-01	-0.0273779	0.882685	546
ATRX	HG-6-64-1	-0.0208394	0.707367	546
ATRX	I-BET-762	-0.170468	6.32625e-07	546
ATRX	IOX2	-0.0208941	0.757933	546
ATRX	IPA-3	-0.0827494	0.0330644	546
ATRX	Imatinib	0.0338693	0.850099	546
ATRX	Ispinesib Mesylate	-0.139151	8.3623e-05	546
ATRX	JNJ-26854165	0.051536	0.302237	546
ATRX	JNK Inhibitor VIII	0.102176	0.0118233	546
ATRX	JNK-9L	-8.7447e-05	0.999256	546
ATRX	JQ1	0.0193041	0.689638	546
ATRX	JQ12	-0.0269742	0.652865	546
ATRX	JW-7-24-1	-0.179592	2.00108e-07	546
ATRX	JW-7-52-1	0.0418914	0.703023	546
ATRX	KIN001-055	0.00645561	0.944675	546
ATRX	KIN001-102	-0.108837	0.00198672	546
ATRX	KIN001-135	-0.0424539	0.707173	546
ATRX	KIN001-236	-0.123798	0.000569702	546
ATRX	KIN001-244	-0.11339	0.00160823	546
ATRX	KIN001-260	-0.113694	0.00143103	546
ATRX	KIN001-266	-0.088043	0.0451382	546
ATRX	KIN001-270	-0.148544	5.4803e-05	546
ATRX	KU-55933	0.0301927	0.657337	546
ATRX	LAQ824	-0.0745042	0.0579286	546
ATRX	LFM-A13	-0.0100065	0.873453	546
ATRX	LY317615	-0.0284025	0.549209	546
ATRX	Lapatinib	0.164148	0.00589621	546
ATRX	Lenalidomide	0.0164163	0.86924	546
ATRX	Linifanib	-0.018227	0.770787	546
ATRX	Lisitinib	-0.0298677	0.674501	546
ATRX	MG-132	-0.00441818	0.975015	546
ATRX	MK-2206	-0.0482185	0.349999	546
ATRX	MLN4924	0.00869403	0.904918	546
ATRX	MP470	-0.0638507	0.133941	546
ATRX	MPS-1-IN-1	-0.0907404	0.0143558	546
ATRX	MS-275	-0.0708949	0.384888	546
ATRX	Masitinib	-0.0631991	0.0959038	546
ATRX	Methotrexate	-0.117456	0.00131376	546
ATRX	Midostaurin	0.0170653	0.739377	546
ATRX	Mitomycin C	-0.0200856	0.734731	546
ATRX	NG-25	-0.120473	0.000642103	546
ATRX	NPK76-II-72-1	-0.203717	1.98171e-09	546
ATRX	NSC-207895	-0.159729	4.5412e-05	546
ATRX	NSC-87877	0.0205265	0.750876	546
ATRX	NU-7441	0.0294836	0.715856	546
ATRX	Navitoclax	-0.181841	4.06344e-07	546
ATRX	Nilotinib	0.012687	0.840302	546
ATRX	Nutlin-3a (-)	-0.0509904	0.28591	546
ATRX	OSI-027	-0.174809	5.48208e-07	546
ATRX	OSI-930	-0.0806007	0.0345241	546
ATRX	OSU-03012	0.0060695	0.927933	546
ATRX	Obatoclax Mesylate	0.0304291	0.550838	546
ATRX	Olaparib	-0.0638729	0.136374	546
ATRX	PAC-1	-0.0368597	0.409505	546
ATRX	PD-0325901	0.160887	1.7717e-05	546
ATRX	PD-0332991	-0.0149037	0.830412	546
ATRX	PD-173074	-0.0108123	0.962231	546
ATRX	PF-4708671	0.0335389	0.759301	546
ATRX	PF-562271	0.00503376	0.945456	546
ATRX	PFI-1	-0.0242122	0.654277	546
ATRX	PHA-665752	-0.0248942	0.884519	546
ATRX	PHA-793887	-0.1571	5.09437e-06	546
ATRX	PI-103	-0.162105	3.66488e-06	546
ATRX	PIK-93	-0.172532	5.20661e-07	546
ATRX	PLX4720	0.124116	0.000934992	546
ATRX	Paclitaxel	0.00769257	0.9642	546
ATRX	Parthenolide	-0.0661011	0.513509	546
ATRX	Pazopanib	-0.0236829	0.702272	546
ATRX	Phenformin	-0.0401741	0.301488	546
ATRX	Pyrimethamine	0.000804225	0.995538	546
ATRX	QL-VIII-58	-0.0518931	0.512839	546
ATRX	QL-X-138	-0.17257	8.86781e-07	546
ATRX	QL-XI-92	-0.17234	7.51613e-07	546
ATRX	QL-XII-47	-0.157611	1.9287e-05	546
ATRX	QL-XII-61	-0.135638	0.0194754	546
ATRX	QS11	-0.0157728	0.840182	546
ATRX	RDEA119	0.182233	1.2408e-07	546
ATRX	RO-3306	0.010958	0.819954	546
ATRX	Rapamycin	-0.0175138	0.914899	546
ATRX	Roscovitine	-0.0174447	0.937125	546
ATRX	Ruxolitinib	-0.057541	0.23559	546
ATRX	S-Trityl-L-cysteine	-0.0695913	0.389632	546
ATRX	SB 216763	0.057	0.248471	546
ATRX	SB 505124	-0.0655782	0.323803	546
ATRX	SB52334	-0.0540524	0.241398	546
ATRX	SB590885	0.158364	9.3602e-05	546
ATRX	SGC0946	-0.0104829	0.879283	546
ATRX	SL 0101-1	0.0428048	0.578291	546
ATRX	SN-38	-0.087224	0.0314737	546
ATRX	SNX-2112	-0.122456	0.000581146	546
ATRX	STF-62247	-0.0672105	0.0917205	546
ATRX	Salubrinal	-0.017956	0.865969	546
ATRX	Saracatinib	0.0720903	0.382536	546
ATRX	Shikonin	-0.0339279	0.549618	546
ATRX	Sorafenib	-0.00426668	0.977501	546
ATRX	Sunitinib	-0.00991062	0.922294	546
ATRX	T0901317	-0.104295	0.00692362	546
ATRX	TAE684	-0.0583008	0.606885	546
ATRX	TAK-715	-0.0924606	0.0102802	546
ATRX	TG101348	-0.146694	2.5873e-05	546
ATRX	TGX221	0.0585649	0.381545	546
ATRX	THZ-2-102-1	-0.137941	9.5407e-05	546
ATRX	THZ-2-49	-0.0401899	0.296923	546
ATRX	TL-1-85	-0.0949668	0.00824931	546
ATRX	TL-2-105	-0.0811935	0.0281297	546
ATRX	TPCA-1	-0.177328	2.44153e-07	546
ATRX	TW 37	-0.103107	0.0105774	546
ATRX	Talazoparib	-0.117928	0.00321434	546
ATRX	Tamoxifen	-0.00984653	0.952385	546
ATRX	Temozolomide	-0.0241734	0.768087	546
ATRX	Temsirolimus	-0.0536339	0.272038	546
ATRX	Thapsigargin	-0.0113574	0.900097	546
ATRX	Tipifarnib	-0.00866262	0.92404	546
ATRX	Tivozanib	-0.00677208	0.930208	546
ATRX	Trametinib	0.17757	4.78749e-07	546
ATRX	Tubastatin A	-0.167943	1.26872e-06	546
ATRX	UNC0638	-0.117004	0.000734082	546
ATRX	UNC1215	-0.0335102	0.535511	546
ATRX	VNLG/124	-0.0426151	0.319011	546
ATRX	VX-11e	0.0662026	0.141132	546
ATRX	VX-680	-0.0597718	0.529628	546
ATRX	VX-702	0.0111558	0.972728	546
ATRX	Veliparib	0.0771854	0.216211	546
ATRX	Vinblastine	-0.0437888	0.335949	546
ATRX	Vinorelbine	-0.0446144	0.41991	546
ATRX	Vorinostat	-0.190213	9.8719e-08	546
ATRX	WH-4-023	0.0631197	0.426065	546
ATRX	WZ-1-84	0.0911161	0.222492	546
ATRX	WZ3105	-0.10985	0.00184669	546
ATRX	XAV939	0.0452651	0.259074	546
ATRX	XL-184	-0.0587431	0.19581	546
ATRX	XMD11-85h	-0.0659114	0.678855	546
ATRX	XMD13-2	-0.150189	1.7018e-05	546
ATRX	XMD14-99	-0.0954389	0.00992788	546
ATRX	XMD15-27	-0.0913992	0.0318706	546
ATRX	XMD8-85	0.038667	0.673231	546
ATRX	XMD8-92	-0.0340945	0.775876	546
ATRX	Y-39983	-0.168529	1.92882e-06	546
ATRX	YK 4-279	-0.0272416	0.65235	546
ATRX	YM155	-0.0891499	0.0482567	546
ATRX	YM201636	-0.138527	9.4681e-05	546
ATRX	Z-LLNle-CHO	0.0718028	0.331291	546
ATRX	ZG-10	-0.156423	0.00620108	546
ATRX	ZM-447439	-0.0731644	0.0974594	546
ATRX	ZSTK474	-0.126311	0.000373963	546
ATRX	Zibotentan	0.031302	0.915835	546
ATRX	piperlongumine	-0.0520938	0.231571	546
ATRX	rTRAIL	0.0942596	0.11529	546
ATRX	selumetinib	0.175076	4.36679e-07	546
AXL	(5Z)-7-Oxozeaenol	-0.136613	0.000233519	558
AXL	17-AAG	-0.352239	8.28403e-25	558
AXL	5-Fluorouracil	0.253025	1.77228e-13	558
AXL	681640	-0.179454	0.000317567	558
AXL	A-443654	-0.0187346	0.936631	558
AXL	A-770041	-0.205779	0.00169281	558
AXL	AC220	0.1217	0.00264714	558
AXL	AG-014699	-0.164985	2.6753e-05	558
AXL	AICAR	0.160998	1.8911e-05	558
AXL	AKT inhibitor VIII	-0.068791	0.116358	558
AXL	AMG-706	-0.125836	0.00843892	558
AXL	AP-24534	0.0636986	0.120843	558
AXL	AR-42	0.284985	0	558
AXL	AS601245	-0.128367	0.00367777	558
AXL	AS605240	0.151857	6.5035e-05	558
AXL	AT-7519	0.284445	0	558
AXL	ATRA	0.118276	0.0050074	558
AXL	AUY922	-0.18363	6.11935e-06	558
AXL	AZ628	-0.0759633	0.304649	558
AXL	AZD6482	-0.173857	4.67098e-06	558
AXL	AZD7762	0.0568743	0.165911	558
AXL	AZD8055	0.133695	0.000423857	558
AXL	Afatinib	-0.0576918	0.125392	558
AXL	Axitinib	0.0515073	0.317586	558
AXL	BAY 61-3606	0.063185	0.122311	558
AXL	BEZ235	-0.242854	7.97218e-10	558
AXL	BHG712	0.231217	1.46337e-11	558
AXL	BI-2536	-0.0322857	0.79404	558
AXL	BIRB 0796	-0.160133	0.000419779	558
AXL	BIX02189	0.15282	1.4062e-05	558
AXL	BMS-509744	-0.203321	0.00799744	558
AXL	BMS-536924	0.063755	0.276204	558
AXL	BMS-708163	-0.156786	3.7046e-05	558
AXL	BMS-754807	0.00878122	0.899159	558
AXL	BMS345541	0.284181	0	558
AXL	BX-795	-0.101725	0.014227	558
AXL	BX-912	0.234978	4.05114e-12	558
AXL	Belinostat	0.228741	6.48626e-11	558
AXL	Bexarotene	-0.091149	0.0958753	558
AXL	Bicalutamide	-0.161266	5.5785e-05	558
AXL	Bleomycin	-0.159203	0.000212648	558
AXL	Bleomycin (50 uM)	-0.397921	1.02737e-34	558
AXL	Bortezomib	-0.256983	3.8909e-05	558
AXL	Bosutinib	-0.06501	0.184823	558
AXL	Bryostatin 1	-0.117979	0.00908415	558
AXL	CAL-101	0.134728	0.000183454	558
AXL	CAY10603	0.22899	2.17596e-11	558
AXL	CCT007093	-0.110518	0.00605575	558
AXL	CCT018159	-0.163703	0.000129262	558
AXL	CEP-701	0.0297089	0.500674	558
AXL	CGP-082996	-0.157083	0.0314961	558
AXL	CGP-60474	-0.199715	0.00264316	558
AXL	CH5424802	0.0907996	0.0582336	558
AXL	CHIR-99021	-0.315313	4.85368e-21	558
AXL	CI-1040	-0.054188	0.219136	558
AXL	CMK	-0.0922848	0.368809	558
AXL	CP466722	0.216322	2.48269e-10	558
AXL	CP724714	0.0753053	0.113584	558
AXL	CUDC-101	0.253304	2.14092e-13	558
AXL	CX-5461	0.196196	1.73111e-08	558
AXL	Camptothecin	-0.0773022	0.0663762	558
AXL	Cetuximab	-0.122121	0.00146284	558
AXL	Cisplatin	-0.184721	6.14525e-06	558
AXL	Crizotinib	-0.00606525	0.981464	558
AXL	Cyclopamine	-0.121821	0.161341	558
AXL	Cytarabine	-0.134988	0.00145977	558
AXL	DMOG	-0.0531371	0.238123	558
AXL	Dabrafenib	-0.0265359	0.575542	558
AXL	Dasatinib	-0.359288	1.82408e-10	558
AXL	Docetaxel	-0.393903	7.07575e-31	558
AXL	Doxorubicin	-0.0719163	0.197214	558
AXL	EHT 1864	0.0300652	0.682463	558
AXL	EKB-569	0.144679	9.5528e-05	558
AXL	EX-527	-0.0443201	0.672274	558
AXL	Elesclomol	-0.252224	3.70037e-11	558
AXL	Embelin	-0.136539	0.00217119	558
AXL	Epothilone B	-0.174345	5.4457e-05	558
AXL	Erlotinib	-0.208613	0.00105525	558
AXL	Etoposide	-0.00598356	0.926765	558
AXL	FH535	-0.0920154	0.0329364	558
AXL	FK866	0.211505	1.00413e-09	558
AXL	FMK	0.0247014	0.749538	558
AXL	FR-180204	0.101783	0.022026	558
AXL	FTI-277	-0.217586	1.10708e-08	558
AXL	Foretinib	0.0257015	0.575233	558
AXL	GDC0449	-0.020816	0.860228	558
AXL	GDC0941	-0.0389287	0.501934	558
AXL	GNF-2	-0.0280332	0.921803	558
AXL	GSK-650394	-0.076738	0.211204	558
AXL	GSK1070916	0.265103	1.05682e-14	558
AXL	GSK1904529A	-0.164867	5.236e-05	558
AXL	GSK2126458	0.213713	9.26194e-10	558
AXL	GSK269962A	-0.160028	3.0885e-05	558
AXL	GSK429286A	0.0496006	0.238719	558
AXL	GSK690693	0.274807	0	558
AXL	GW 441756	-0.00266117	0.994189	558
AXL	GW-2580	0.00510034	0.994893	558
AXL	GW843682X	0.035422	0.725739	558
AXL	Gefitinib	-0.0653722	0.113437	558
AXL	Gemcitabine	-0.0823594	0.0692949	558
AXL	Genentech Cpd 10	0.183343	1.41386e-07	558
AXL	HG-5-113-01	0.0232652	0.785417	558
AXL	HG-5-88-01	0.0496227	0.742831	558
AXL	HG-6-64-1	-0.151013	0.000143841	558
AXL	I-BET-762	0.305999	0	558
AXL	IOX2	-0.116212	0.0194554	558
AXL	IPA-3	0.0382055	0.356828	558
AXL	Imatinib	0.0322995	0.855277	558
AXL	Ispinesib Mesylate	0.235931	6.49031e-12	558
AXL	JNJ-26854165	-0.170109	4.7349e-05	558
AXL	JNK Inhibitor VIII	-0.239433	5.5988e-10	558
AXL	JNK-9L	0.00293146	0.97229	558
AXL	JQ1	0.0296474	0.516508	558
AXL	JQ12	0.0134865	0.838933	558
AXL	JW-7-24-1	0.222583	6.89288e-11	558
AXL	JW-7-52-1	-0.150339	0.0492699	558
AXL	KIN001-055	-0.0267462	0.713047	558
AXL	KIN001-102	0.342529	0	558
AXL	KIN001-135	-0.0956305	0.300537	558
AXL	KIN001-236	0.200866	8.53693e-09	558
AXL	KIN001-244	0.192529	3.6403e-08	558
AXL	KIN001-260	0.220507	1.50978e-10	558
AXL	KIN001-266	0.0951437	0.0289565	558
AXL	KIN001-270	0.0764412	0.0479793	558
AXL	KU-55933	-0.0331928	0.615949	558
AXL	LAQ824	0.179996	9.87173e-07	558
AXL	LFM-A13	-0.178496	4.1241e-05	558
AXL	LY317615	0.0845403	0.0399727	558
AXL	Lapatinib	-0.189154	0.00124752	558
AXL	Lenalidomide	-0.00429618	0.971792	558
AXL	Linifanib	0.0744122	0.105283	558
AXL	Lisitinib	0.0596356	0.310554	558
AXL	MG-132	-0.174093	0.0128913	558
AXL	MK-2206	0.0944163	0.043417	558
AXL	MLN4924	-0.180206	0.000213032	558
AXL	MP470	0.15234	0.000275039	558
AXL	MPS-1-IN-1	0.246118	2.06585e-12	558
AXL	MS-275	0.16985	0.0142409	558
AXL	Masitinib	0.197633	1.91291e-08	558
AXL	Methotrexate	0.295061	0	558
AXL	Midostaurin	-0.314301	6.66962e-18	558
AXL	Mitomycin C	0.0471425	0.35983	558
AXL	NG-25	0.219564	1.35029e-10	558
AXL	NPK76-II-72-1	0.336836	0	558
AXL	NSC-207895	0.0767089	0.0680275	558
AXL	NSC-87877	-0.0610677	0.253317	558
AXL	NU-7441	-0.0895237	0.123936	558
AXL	Navitoclax	0.335051	0	558
AXL	Nilotinib	0.0857211	0.0613394	558
AXL	Nutlin-3a (-)	0.0138038	0.81388	558
AXL	OSI-027	0.232756	1.2389e-11	558
AXL	OSI-930	0.162374	7.47845e-06	558
AXL	OSU-03012	-0.0512705	0.296136	558
AXL	Obatoclax Mesylate	-0.0453088	0.346158	558
AXL	Olaparib	-0.132348	0.000877429	558
AXL	PAC-1	0.157619	3.7789e-05	558
AXL	PD-0325901	-0.14267	0.000161346	558
AXL	PD-0332991	-0.127276	0.00435321	558
AXL	PD-173074	-0.0290767	0.862487	558
AXL	PF-4708671	-0.0311639	0.781554	558
AXL	PF-562271	-0.168478	0.000234484	558
AXL	PFI-1	-0.00345394	0.957465	558
AXL	PHA-665752	-0.165074	0.0701396	558
AXL	PHA-793887	0.316306	0	558
AXL	PI-103	0.21277	7.12201e-10	558
AXL	PIK-93	0.275206	0	558
AXL	PLX4720	-0.00263423	0.960973	558
AXL	Paclitaxel	-0.127059	0.139656	558
AXL	Parthenolide	-0.0462243	0.674414	558
AXL	Pazopanib	-0.123777	0.00596485	558
AXL	Phenformin	0.256259	1.4897e-13	558
AXL	Pyrimethamine	0.0584891	0.6164	558
AXL	QL-VIII-58	-0.128781	0.0413631	558
AXL	QL-X-138	0.219557	2.28506e-10	558
AXL	QL-XI-92	0.166798	1.74782e-06	558
AXL	QL-XII-47	0.115432	0.00223109	558
AXL	QL-XII-61	0.138304	0.0170318	558
AXL	QS11	0.00888204	0.916903	558
AXL	RDEA119	-0.139905	6.5152e-05	558
AXL	RO-3306	-0.269798	1.37942e-12	558
AXL	Rapamycin	0.00815832	0.966493	558
AXL	Roscovitine	-0.0869603	0.566175	558
AXL	Ruxolitinib	0.0667984	0.155179	558
AXL	S-Trityl-L-cysteine	0.0838795	0.283706	558
AXL	SB 216763	-0.270239	8.39814e-10	558
AXL	SB 505124	-0.0216188	0.812561	558
AXL	SB52334	0.161363	2.4958e-05	558
AXL	SB590885	0.0686677	0.148663	558
AXL	SGC0946	-0.0896298	0.0489935	558
AXL	SL 0101-1	-0.0662202	0.364403	558
AXL	SN-38	-0.117925	0.00247542	558
AXL	SNX-2112	0.17909	2.77981e-07	558
AXL	STF-62247	0.0751242	0.0570001	558
AXL	Salubrinal	0.0177553	0.867393	558
AXL	Saracatinib	-0.189747	0.00796771	558
AXL	Shikonin	-0.0456678	0.393788	558
AXL	Sorafenib	-0.00402208	0.978857	558
AXL	Sunitinib	0.00393898	0.971269	558
AXL	T0901317	0.108817	0.00468848	558
AXL	TAE684	-0.0766057	0.460706	558
AXL	TAK-715	0.254206	1.11816e-13	558
AXL	TG101348	0.214385	3.54699e-10	558
AXL	TGX221	-0.365333	1.64201e-11	558
AXL	THZ-2-102-1	0.30346	0	558
AXL	THZ-2-49	0.133549	0.000196238	558
AXL	TL-1-85	0.205057	2.48763e-09	558
AXL	TL-2-105	0.235396	1.1326e-11	558
AXL	TPCA-1	0.266453	2.52139e-15	558
AXL	TW 37	-0.12359	0.00168236	558
AXL	Talazoparib	-0.101052	0.0134164	558
AXL	Tamoxifen	0.0118937	0.941951	558
AXL	Temozolomide	-0.0096262	0.920796	558
AXL	Temsirolimus	-0.122782	0.0031945	558
AXL	Thapsigargin	-0.116473	0.0162666	558
AXL	Tipifarnib	-0.0456386	0.4824	558
AXL	Tivozanib	0.0516316	0.353801	558
AXL	Trametinib	-0.213051	1.02303e-09	558
AXL	Tubastatin A	0.269535	0	558
AXL	UNC0638	0.239528	6.00977e-13	558
AXL	UNC1215	-0.0927235	0.0404805	558
AXL	VNLG/124	0.112726	0.00329694	558
AXL	VX-11e	0.0818745	0.0601424	558
AXL	VX-680	0.0551242	0.568635	558
AXL	VX-702	0.0175673	0.945785	558
AXL	Veliparib	-0.103985	0.0850233	558
AXL	Vinblastine	-0.0661094	0.125173	558
AXL	Vinorelbine	0.0394333	0.487459	558
AXL	Vorinostat	0.314665	0	558
AXL	WH-4-023	-0.274251	1.1254e-05	558
AXL	WZ-1-84	-0.217472	0.000646989	558
AXL	WZ3105	0.345357	0	558
AXL	XAV939	-0.231065	1.22435e-10	558
AXL	XL-184	0.00658997	0.912845	558
AXL	XMD11-85h	0.0367683	0.847526	558
AXL	XMD13-2	0.27694	0	558
AXL	XMD14-99	0.204904	6.33332e-09	558
AXL	XMD15-27	0.0786345	0.0719094	558
AXL	XMD8-85	-0.120023	0.0985878	558
AXL	XMD8-92	-0.0419586	0.711382	558
AXL	Y-39983	0.105404	0.00383676	558
AXL	YK 4-279	-0.106384	0.0215169	558
AXL	YM155	-0.00964081	0.890614	558
AXL	YM201636	0.251653	2.4503e-13	558
AXL	Z-LLNle-CHO	-0.106636	0.120632	558
AXL	ZG-10	0.0445947	0.528798	558
AXL	ZM-447439	0.0647575	0.150127	558
AXL	ZSTK474	0.210076	1.2377e-09	558
AXL	Zibotentan	-0.0528064	0.787224	558
AXL	piperlongumine	-0.254166	3.66805e-12	558
AXL	rTRAIL	-0.0396881	0.594196	558
AXL	selumetinib	-0.123589	0.000498862	558
BACH2	(5Z)-7-Oxozeaenol	0.0593795	0.14714	60468
BACH2	17-AAG	0.302684	0	60468
BACH2	5-Fluorouracil	-0.122498	0.000604654	60468
BACH2	681640	-0.013725	0.84926	60468
BACH2	A-443654	-0.105522	0.453317	60468
BACH2	A-770041	-0.197673	0.00265255	60468
BACH2	AC220	0.0116184	0.850607	60468
BACH2	AG-014699	0.0882772	0.0310846	60468
BACH2	AICAR	-0.187742	4.64687e-07	60468
BACH2	AKT inhibitor VIII	0.119636	0.00378027	60468
BACH2	AMG-706	0.0974116	0.0504239	60468
BACH2	AP-24534	-0.170667	4.68459e-06	60468
BACH2	AR-42	-0.284809	3.6303e-17	60468
BACH2	AS601245	0.0314165	0.590277	60468
BACH2	AS605240	-0.0332541	0.469891	60468
BACH2	AT-7519	-0.295658	1.1055e-18	60468
BACH2	ATRA	-0.0552087	0.251919	60468
BACH2	AUY922	-0.0126462	0.851408	60468
BACH2	AZ628	0.0866694	0.228863	60468
BACH2	AZD6482	-0.063403	0.146954	60468
BACH2	AZD7762	-0.23502	1.48268e-10	60468
BACH2	AZD8055	-0.247982	1.10084e-11	60468
BACH2	Afatinib	0.127622	0.000328866	60468
BACH2	Axitinib	0.0098414	0.888468	60468
BACH2	BAY 61-3606	-0.188735	4.62216e-07	60468
BACH2	BEZ235	-0.0714711	0.117771	60468
BACH2	BHG712	-0.23981	2.23497e-12	60468
BACH2	BI-2536	-0.0646356	0.525981	60468
BACH2	BIRB 0796	0.0702464	0.149404	60468
BACH2	BIX02189	-0.245084	8.29306e-13	60468
BACH2	BMS-509744	0.0300567	0.772647	60468
BACH2	BMS-536924	0.05063	0.427637	60468
BACH2	BMS-708163	0.109611	0.00449532	60468
BACH2	BMS-754807	0.0807639	0.102348	60468
BACH2	BMS345541	-0.200251	6.08908e-09	60468
BACH2	BX-795	-0.0705239	0.10653	60468
BACH2	BX-912	-0.279079	8.21685e-17	60468
BACH2	Belinostat	-0.271172	5.13061e-15	60468
BACH2	Bexarotene	0.107989	0.0359575	60468
BACH2	Bicalutamide	0.102078	0.0130197	60468
BACH2	Bleomycin	0.0276572	0.65311	60468
BACH2	Bleomycin (50 uM)	0.146086	3.4214e-05	60468
BACH2	Bortezomib	0.00657054	0.953086	60468
BACH2	Bosutinib	-0.072173	0.132178	60468
BACH2	Bryostatin 1	0.0181307	0.768629	60468
BACH2	CAL-101	-0.236792	7.31643e-12	60468
BACH2	CAY10603	-0.297191	8.95879e-19	60468
BACH2	CCT007093	0.114188	0.00444515	60468
BACH2	CCT018159	0.0302912	0.586367	60468
BACH2	CEP-701	-0.181978	1.07101e-06	60468
BACH2	CGP-082996	-0.133574	0.0802233	60468
BACH2	CGP-60474	-0.127646	0.0773291	60468
BACH2	CH5424802	0.00429986	0.959446	60468
BACH2	CHIR-99021	-0.00332212	0.943115	60468
BACH2	CI-1040	0.149233	0.000129258	60468
BACH2	CMK	-0.243776	0.00396749	60468
BACH2	CP466722	-0.280569	7.23222e-17	60468
BACH2	CP724714	0.043891	0.419135	60468
BACH2	CUDC-101	-0.289313	2.32625e-17	60468
BACH2	CX-5461	-0.249814	3.55705e-13	60468
BACH2	Camptothecin	-0.151198	0.000103783	60468
BACH2	Cetuximab	0.126445	0.000955157	60468
BACH2	Cisplatin	0.021164	0.707777	60468
BACH2	Crizotinib	0.038611	0.812132	60468
BACH2	Cyclopamine	-0.188549	0.0178583	60468
BACH2	Cytarabine	-0.190143	3.25931e-06	60468
BACH2	DMOG	-0.212249	1.62419e-08	60468
BACH2	Dabrafenib	0.0259994	0.584097	60468
BACH2	Dasatinib	-0.0342458	0.643104	60468
BACH2	Docetaxel	0.166848	4.82862e-06	60468
BACH2	Doxorubicin	-0.0493979	0.425177	60468
BACH2	EHT 1864	0.0429716	0.51303	60468
BACH2	EKB-569	-0.107584	0.00459715	60468
BACH2	EX-527	0.0430756	0.681826	60468
BACH2	Elesclomol	-0.00244943	0.963379	60468
BACH2	Embelin	-0.0507209	0.374542	60468
BACH2	Epothilone B	0.0522508	0.299941	60468
BACH2	Erlotinib	0.0760553	0.298377	60468
BACH2	Etoposide	-0.0567187	0.220489	60468
BACH2	FH535	0.0571793	0.221243	60468
BACH2	FK866	-0.211804	9.52432e-10	60468
BACH2	FMK	-0.0427612	0.534047	60468
BACH2	FR-180204	0.00167943	0.983299	60468
BACH2	FTI-277	0.13077	0.000826309	60468
BACH2	Foretinib	-0.182885	4.69449e-07	60468
BACH2	GDC0449	-0.0463511	0.625125	60468
BACH2	GDC0941	-0.113912	0.0104212	60468
BACH2	GNF-2	0.0647654	0.775109	60468
BACH2	GSK-650394	0.0203894	0.819162	60468
BACH2	GSK1070916	-0.238316	5.16349e-12	60468
BACH2	GSK1904529A	0.146451	0.000366862	60468
BACH2	GSK2126458	-0.246136	1.13239e-12	60468
BACH2	GSK269962A	-0.0438022	0.401772	60468
BACH2	GSK429286A	-0.095833	0.013669	60468
BACH2	GSK690693	-0.270894	1.93306e-15	60468
BACH2	GW 441756	0.0100178	0.978911	60468
BACH2	GW-2580	0.0499313	0.836304	60468
BACH2	GW843682X	-0.101164	0.206571	60468
BACH2	Gefitinib	0.10911	0.00573763	60468
BACH2	Gemcitabine	-0.0525218	0.281056	60468
BACH2	Genentech Cpd 10	-0.218127	2.58288e-10	60468
BACH2	HG-5-113-01	-0.0626538	0.375914	60468
BACH2	HG-5-88-01	-0.0359611	0.830258	60468
BACH2	HG-6-64-1	-0.109632	0.00827738	60468
BACH2	I-BET-762	-0.347723	2.54559e-26	60468
BACH2	IOX2	-0.00423843	0.958865	60468
BACH2	IPA-3	-0.295034	9.63938e-17	60468
BACH2	Imatinib	0.0277064	0.878151	60468
BACH2	Ispinesib Mesylate	-0.25041	2.62405e-13	60468
BACH2	JNJ-26854165	0.0145192	0.817605	60468
BACH2	JNK Inhibitor VIII	0.113148	0.00494601	60468
BACH2	JNK-9L	-0.0770921	0.123503	60468
BACH2	JQ1	-0.116124	0.00304857	60468
BACH2	JQ12	-0.0793636	0.109417	60468
BACH2	JW-7-24-1	-0.323786	1.52639e-22	60468
BACH2	JW-7-52-1	-0.1238	0.1275	60468
BACH2	KIN001-055	0.0321528	0.640929	60468
BACH2	KIN001-102	-0.220964	9.25553e-11	60468
BACH2	KIN001-135	0.0581798	0.580818	60468
BACH2	KIN001-236	-0.253694	1.61159e-13	60468
BACH2	KIN001-244	-0.235198	9.92687e-12	60468
BACH2	KIN001-260	-0.207849	1.79068e-09	60468
BACH2	KIN001-266	-0.149287	0.000391725	60468
BACH2	KIN001-270	-0.23788	3.36624e-11	60468
BACH2	KU-55933	-0.107052	0.0279146	60468
BACH2	LAQ824	-0.171852	3.15392e-06	60468
BACH2	LFM-A13	0.0787819	0.0942484	60468
BACH2	LY317615	-0.0949813	0.019333	60468
BACH2	Lapatinib	0.132473	0.0296801	60468
BACH2	Lenalidomide	-0.0155501	0.877628	60468
BACH2	Linifanib	0.0481264	0.344684	60468
BACH2	Lisitinib	0.0557283	0.353693	60468
BACH2	MG-132	0.0443428	0.647991	60468
BACH2	MK-2206	-0.16923	9.0851e-05	60468
BACH2	MLN4924	0.138659	0.00507484	60468
BACH2	MP470	-0.0988009	0.0176996	60468
BACH2	MPS-1-IN-1	-0.161733	6.17755e-06	60468
BACH2	MS-275	-0.11734	0.107832	60468
BACH2	Masitinib	-0.150873	2.4746e-05	60468
BACH2	Methotrexate	-0.356868	1.41335e-25	60468
BACH2	Midostaurin	0.0743682	0.0821088	60468
BACH2	Mitomycin C	-0.0437628	0.399176	60468
BACH2	NG-25	-0.294165	1.64392e-18	60468
BACH2	NPK76-II-72-1	-0.316865	7.95013e-22	60468
BACH2	NSC-207895	-0.144302	0.00024684	60468
BACH2	NSC-87877	0.0835547	0.103774	60468
BACH2	NU-7441	-0.0517219	0.450444	60468
BACH2	Navitoclax	-0.182037	3.94808e-07	60468
BACH2	Nilotinib	-0.0199748	0.740864	60468
BACH2	Nutlin-3a (-)	-0.0520248	0.274155	60468
BACH2	OSI-027	-0.274173	7.41688e-16	60468
BACH2	OSI-930	-0.111719	0.00265992	60468
BACH2	OSU-03012	-0.129999	0.00218928	60468
BACH2	Obatoclax Mesylate	-0.190078	1.69081e-06	60468
BACH2	Olaparib	0.0349211	0.446316	60468
BACH2	PAC-1	-0.224531	1.40056e-09	60468
BACH2	PD-0325901	0.215129	5.16766e-09	60468
BACH2	PD-0332991	-0.070889	0.160111	60468
BACH2	PD-173074	0.0143291	0.943299	60468
BACH2	PF-4708671	0.0510862	0.575903	60468
BACH2	PF-562271	0.0775654	0.130774	60468
BACH2	PFI-1	-0.0888498	0.0415031	60468
BACH2	PHA-665752	0.0510386	0.729033	60468
BACH2	PHA-793887	-0.33879	6.05449e-25	60468
BACH2	PI-103	-0.319199	1.43528e-21	60468
BACH2	PIK-93	-0.348747	2.08416e-26	60468
BACH2	PLX4720	0.0439824	0.298958	60468
BACH2	Paclitaxel	-0.0270213	0.842208	60468
BACH2	Parthenolide	-0.195665	0.026212	60468
BACH2	Pazopanib	0.0454132	0.41189	60468
BACH2	Phenformin	-0.252546	3.76077e-13	60468
BACH2	Pyrimethamine	-0.0570507	0.624471	60468
BACH2	QL-VIII-58	-0.0543575	0.486785	60468
BACH2	QL-X-138	-0.316378	5.11567e-21	60468
BACH2	QL-XI-92	-0.317853	1.52207e-21	60468
BACH2	QL-XII-47	-0.19439	8.48283e-08	60468
BACH2	QL-XII-61	-0.217491	6.1391e-05	60468
BACH2	QS11	-0.0939386	0.0797091	60468
BACH2	RDEA119	0.224391	4.4665e-11	60468
BACH2	RO-3306	0.106999	0.00817247	60468
BACH2	Rapamycin	-0.123264	0.199491	60468
BACH2	Roscovitine	-0.023697	0.912707	60468
BACH2	Ruxolitinib	0.0330072	0.547394	60468
BACH2	S-Trityl-L-cysteine	-0.120655	0.101094	60468
BACH2	SB 216763	0.0751482	0.116244	60468
BACH2	SB 505124	-0.00512083	0.965572	60468
BACH2	SB52334	-0.0574372	0.206292	60468
BACH2	SB590885	0.0447652	0.374164	60468
BACH2	SGC0946	0.120428	0.00608468	60468
BACH2	SL 0101-1	0.0641641	0.379295	60468
BACH2	SN-38	-0.0852359	0.0362062	60468
BACH2	SNX-2112	-0.257617	4.48988e-14	60468
BACH2	STF-62247	-0.162251	1.377e-05	60468
BACH2	Salubrinal	-0.213713	0.00298682	60468
BACH2	Saracatinib	0.0308945	0.74254	60468
BACH2	Shikonin	-0.146576	0.000818794	60468
BACH2	Sorafenib	0.0369188	0.76776	60468
BACH2	Sunitinib	-0.03883	0.641265	60468
BACH2	T0901317	-0.354228	3.126e-25	60468
BACH2	TAE684	0.116925	0.184302	60468
BACH2	TAK-715	-0.206993	2.3035e-09	60468
BACH2	TG101348	-0.224436	4.54392e-11	60468
BACH2	TGX221	0.0359925	0.609479	60468
BACH2	THZ-2-102-1	-0.285186	4.98311e-17	60468
BACH2	THZ-2-49	-0.24217	3.01288e-12	60468
BACH2	TL-1-85	-0.258729	2.3956e-14	60468
BACH2	TL-2-105	-0.142865	6.426e-05	60468
BACH2	TPCA-1	-0.285187	1.50355e-17	60468
BACH2	TW 37	-0.0816593	0.0524763	60468
BACH2	Talazoparib	-0.0213494	0.674854	60468
BACH2	Tamoxifen	-0.0562817	0.583115	60468
BACH2	Temozolomide	0.0681692	0.252157	60468
BACH2	Temsirolimus	-0.175304	1.0592e-05	60468
BACH2	Thapsigargin	-0.0628225	0.271908	60468
BACH2	Tipifarnib	-0.0169388	0.837512	60468
BACH2	Tivozanib	0.013809	0.851996	60468
BACH2	Trametinib	0.221127	2.18405e-10	60468
BACH2	Tubastatin A	-0.352213	9.68645e-27	60468
BACH2	UNC0638	-0.27493	6.71278e-17	60468
BACH2	UNC1215	0.108982	0.0144189	60468
BACH2	VNLG/124	-0.0643393	0.113713	60468
BACH2	VX-11e	0.00239989	0.970695	60468
BACH2	VX-680	-0.150744	0.0515738	60468
BACH2	VX-702	-0.00670451	0.983909	60468
BACH2	Veliparib	0.101243	0.0927904	60468
BACH2	Vinblastine	-0.173793	7.96712e-06	60468
BACH2	Vinorelbine	-0.0656558	0.198379	60468
BACH2	Vorinostat	-0.283288	5.30124e-16	60468
BACH2	WH-4-023	-0.0561238	0.486279	60468
BACH2	WZ-1-84	0.0284866	0.749396	60468
BACH2	WZ3105	-0.265105	4.13037e-15	60468
BACH2	XAV939	0.106563	0.00479974	60468
BACH2	XL-184	-0.0454491	0.337079	60468
BACH2	XMD11-85h	-0.0628634	0.698735	60468
BACH2	XMD13-2	-0.317506	1.38528e-21	60468
BACH2	XMD14-99	-0.126008	0.000540656	60468
BACH2	XMD15-27	-0.124868	0.00210628	60468
BACH2	XMD8-85	-0.189339	0.00419632	60468
BACH2	XMD8-92	-0.104961	0.228699	60468
BACH2	Y-39983	-0.245883	1.21417e-12	60468
BACH2	YK 4-279	-0.0188041	0.772264	60468
BACH2	YM155	-0.125361	0.00342166	60468
BACH2	YM201636	-0.286668	3.50745e-17	60468
BACH2	Z-LLNle-CHO	-0.0449487	0.577465	60468
BACH2	ZG-10	-0.127512	0.029726	60468
BACH2	ZM-447439	-0.138248	0.000678279	60468
BACH2	ZSTK474	-0.287442	1.79523e-17	60468
BACH2	Zibotentan	0.0287579	0.922935	60468
BACH2	piperlongumine	-0.0026355	0.966079	60468
BACH2	rTRAIL	-0.0110921	0.908178	60468
BACH2	selumetinib	0.184474	9.25615e-08	60468
BCL2	(5Z)-7-Oxozeaenol	0.0360699	0.414222	596
BCL2	17-AAG	0.358397	0	596
BCL2	5-Fluorouracil	-0.303874	2.47277e-19	596
BCL2	681640	0.107823	0.0477469	596
BCL2	A-443654	0.0227136	0.924259	596
BCL2	A-770041	0.0564197	0.50216	596
BCL2	AC220	-0.206897	1.87312e-08	596
BCL2	AG-014699	0.0999966	0.0134647	596
BCL2	AICAR	-0.255501	2.25806e-12	596
BCL2	AKT inhibitor VIII	0.157532	9.8803e-05	596
BCL2	AMG-706	0.0675718	0.211366	596
BCL2	AP-24534	-0.179947	1.22124e-06	596
BCL2	AR-42	-0.346485	1.28439e-25	596
BCL2	AS601245	0.103125	0.0243264	596
BCL2	AS605240	-0.145687	0.000134158	596
BCL2	AT-7519	-0.327456	5.55169e-23	596
BCL2	ATRA	-0.202681	1.78748e-07	596
BCL2	AUY922	0.0128312	0.84858	596
BCL2	AZ628	0.0265097	0.764352	596
BCL2	AZD6482	0.0284195	0.585987	596
BCL2	AZD7762	-0.13675	0.000323566	596
BCL2	AZD8055	-0.189877	3.27689e-07	596
BCL2	Afatinib	0.199166	7.25115e-09	596
BCL2	Axitinib	-0.0310972	0.587662	596
BCL2	BAY 61-3606	-0.192038	2.85193e-07	596
BCL2	BEZ235	0.0639781	0.168197	596
BCL2	BHG712	-0.3535	7.06716e-27	596
BCL2	BI-2536	0.0100999	0.945319	596
BCL2	BIRB 0796	0.128971	0.0045977	596
BCL2	BIX02189	-0.347948	7.04595e-26	596
BCL2	BMS-509744	0.144568	0.0783853	596
BCL2	BMS-536924	-0.0426248	0.52832	596
BCL2	BMS-708163	0.163365	1.7509e-05	596
BCL2	BMS-754807	0.0857734	0.0792805	596
BCL2	BMS345541	-0.274919	4.26072e-16	596
BCL2	BX-795	-0.0602972	0.177522	596
BCL2	BX-912	-0.329954	1.61753e-23	596
BCL2	Belinostat	-0.293812	1.24398e-17	596
BCL2	Bexarotene	0.0120543	0.908824	596
BCL2	Bicalutamide	0.170328	1.9783e-05	596
BCL2	Bleomycin	0.0347256	0.55797	596
BCL2	Bleomycin (50 uM)	0.222057	1.35724e-10	596
BCL2	Bortezomib	0.0633979	0.431009	596
BCL2	Bosutinib	-0.0128278	0.847962	596
BCL2	Bryostatin 1	0.14989	0.000750007	596
BCL2	CAL-101	-0.28521	4.32364e-17	596
BCL2	CAY10603	-0.329596	3.50463e-23	596
BCL2	CCT007093	0.132751	0.000836845	596
BCL2	CCT018159	0.0969205	0.03256	596
BCL2	CEP-701	-0.153878	4.7187e-05	596
BCL2	CGP-082996	0.131756	0.0858477	596
BCL2	CGP-60474	0.026382	0.796052	596
BCL2	CH5424802	-0.026124	0.696559	596
BCL2	CHIR-99021	0.0929197	0.0123727	596
BCL2	CI-1040	0.0925306	0.0241727	596
BCL2	CMK	0.00502723	0.974747	596
BCL2	CP466722	-0.331159	1.38369e-23	596
BCL2	CP724714	0.0809682	0.0833696	596
BCL2	CUDC-101	-0.297573	2.24979e-18	596
BCL2	CX-5461	-0.264995	9.96663e-15	596
BCL2	Camptothecin	-0.100254	0.0136112	596
BCL2	Cetuximab	0.154958	3.872e-05	596
BCL2	Cisplatin	0.090601	0.0449559	596
BCL2	Crizotinib	0.0839047	0.483584	596
BCL2	Cyclopamine	-0.0041049	0.977567	596
BCL2	Cytarabine	0.0451796	0.377677	596
BCL2	DMOG	-0.121439	0.0023987	596
BCL2	Dabrafenib	0.0159415	0.748812	596
BCL2	Dasatinib	0.14796	0.017108	596
BCL2	Docetaxel	0.350007	0	596
BCL2	Doxorubicin	0.0355198	0.596572	596
BCL2	EHT 1864	0.0285762	0.699989	596
BCL2	EKB-569	-0.104556	0.00602164	596
BCL2	EX-527	-0.0157925	0.904651	596
BCL2	Elesclomol	0.204017	1.50483e-07	596
BCL2	Embelin	0.111757	0.016119	596
BCL2	Epothilone B	0.133975	0.00227084	596
BCL2	Erlotinib	0.19754	0.00210387	596
BCL2	Etoposide	-0.0457908	0.34119	596
BCL2	FH535	0.162601	5.9113e-05	596
BCL2	FK866	-0.299104	1.04205e-18	596
BCL2	FMK	-0.0882483	0.115694	596
BCL2	FR-180204	-0.175387	9.04228e-06	596
BCL2	FTI-277	0.162774	2.4816e-05	596
BCL2	Foretinib	-0.179409	8.06283e-07	596
BCL2	GDC0449	-0.0260773	0.822358	596
BCL2	GDC0941	-0.0080039	0.912503	596
BCL2	GNF-2	0.0491719	0.839532	596
BCL2	GSK-650394	0.0414207	0.573865	596
BCL2	GSK1070916	-0.278367	3.91483e-16	596
BCL2	GSK1904529A	0.169037	3.3103e-05	596
BCL2	GSK2126458	-0.254294	1.77044e-13	596
BCL2	GSK269962A	0.0603877	0.20813	596
BCL2	GSK429286A	-0.169686	3.89272e-06	596
BCL2	GSK690693	-0.218574	2.64857e-10	596
BCL2	GW 441756	-0.030335	0.891557	596
BCL2	GW-2580	-0.0374501	0.922678	596
BCL2	GW843682X	-0.0224287	0.837428	596
BCL2	Gefitinib	0.156943	4.1049e-05	596
BCL2	Gemcitabine	-0.0382576	0.45806	596
BCL2	Genentech Cpd 10	-0.272343	1.26961e-15	596
BCL2	HG-5-113-01	0.0158935	0.859362	596
BCL2	HG-5-88-01	-0.0280972	0.877527	596
BCL2	HG-6-64-1	-0.0240855	0.657772	596
BCL2	I-BET-762	-0.449486	1.47635e-45	596
BCL2	IOX2	0.0748782	0.153264	596
BCL2	IPA-3	-0.213781	4.29147e-09	596
BCL2	Imatinib	-0.0288191	0.87345	596
BCL2	Ispinesib Mesylate	-0.259272	3.37305e-14	596
BCL2	JNJ-26854165	0.0540952	0.275039	596
BCL2	JNK Inhibitor VIII	0.196252	3.64395e-07	596
BCL2	JNK-9L	-0.0304744	0.623675	596
BCL2	JQ1	-0.115417	0.00327051	596
BCL2	JQ12	-0.0703358	0.163954	596
BCL2	JW-7-24-1	-0.368997	1.25123e-29	596
BCL2	JW-7-52-1	0.074936	0.430159	596
BCL2	KIN001-055	-0.0177518	0.828471	596
BCL2	KIN001-102	-0.340657	4.54868e-25	596
BCL2	KIN001-135	0.111793	0.206719	596
BCL2	KIN001-236	-0.372629	8.80864e-30	596
BCL2	KIN001-244	-0.318279	2.53695e-21	596
BCL2	KIN001-260	-0.368246	2.99929e-29	596
BCL2	KIN001-266	-0.158677	0.000174746	596
BCL2	KIN001-270	-0.161975	9.71873e-06	596
BCL2	KU-55933	-0.0448338	0.460808	596
BCL2	LAQ824	-0.221264	1.15849e-09	596
BCL2	LFM-A13	0.109679	0.015175	596
BCL2	LY317615	-0.121295	0.00211629	596
BCL2	Lapatinib	0.245189	1.6578e-05	596
BCL2	Lenalidomide	-0.0230128	0.802155	596
BCL2	Linifanib	-0.205986	1.90994e-08	596
BCL2	Lisitinib	-0.00813376	0.929254	596
BCL2	MG-132	0.103327	0.185893	596
BCL2	MK-2206	-0.00955161	0.885298	596
BCL2	MLN4924	0.0853492	0.101794	596
BCL2	MP470	-0.141283	0.00070561	596
BCL2	MPS-1-IN-1	-0.211026	2.13405e-09	596
BCL2	MS-275	-0.100038	0.184635	596
BCL2	Masitinib	-0.280301	2.6784e-16	596
BCL2	Methotrexate	-0.340481	3.39127e-23	596
BCL2	Midostaurin	0.107791	0.00859391	596
BCL2	Mitomycin C	-0.0442889	0.393134	596
BCL2	NG-25	-0.387325	9.25842e-33	596
BCL2	NPK76-II-72-1	-0.403185	5.26901e-36	596
BCL2	NSC-207895	-0.0828834	0.0464498	596
BCL2	NSC-87877	0.0971399	0.055379	596
BCL2	NU-7441	0.00442025	0.969438	596
BCL2	Navitoclax	-0.48232	3.41163e-49	596
BCL2	Nilotinib	-0.122808	0.00443158	596
BCL2	Nutlin-3a (-)	-0.14961	0.000240669	596
BCL2	OSI-027	-0.339102	1.82711e-24	596
BCL2	OSI-930	-0.230139	6.54158e-11	596
BCL2	OSU-03012	-0.0229002	0.684052	596
BCL2	Obatoclax Mesylate	-0.054797	0.241645	596
BCL2	Olaparib	0.0643905	0.132744	596
BCL2	PAC-1	-0.217808	4.77485e-09	596
BCL2	PD-0325901	0.188386	3.9334e-07	596
BCL2	PD-0332991	0.016125	0.81593	596
BCL2	PD-173074	0.0188728	0.918913	596
BCL2	PF-4708671	0.0490106	0.594117	596
BCL2	PF-562271	0.0930591	0.059224	596
BCL2	PFI-1	-0.052932	0.263457	596
BCL2	PHA-665752	0.0782013	0.5671	596
BCL2	PHA-793887	-0.375983	5.29638e-31	596
BCL2	PI-103	-0.33973	1.50558e-24	596
BCL2	PIK-93	-0.448199	3.02579e-45	596
BCL2	PLX4720	0.0680336	0.0930277	596
BCL2	Paclitaxel	0.0391726	0.750629	596
BCL2	Parthenolide	-0.0460092	0.675695	596
BCL2	Pazopanib	0.0663671	0.196102	596
BCL2	Phenformin	-0.246544	1.4313e-12	596
BCL2	Pyrimethamine	0.0111581	0.942121	596
BCL2	QL-VIII-58	0.0855931	0.21875	596
BCL2	QL-X-138	-0.321899	8.85453e-22	596
BCL2	QL-XI-92	-0.335615	4.03872e-24	596
BCL2	QL-XII-47	-0.194858	7.86859e-08	596
BCL2	QL-XII-61	-0.24303	5.63702e-06	596
BCL2	QS11	0.00362551	0.967607	596
BCL2	RDEA119	0.177638	2.65974e-07	596
BCL2	RO-3306	0.223201	7.21045e-09	596
BCL2	Rapamycin	0.0225126	0.886636	596
BCL2	Roscovitine	0.0270002	0.899463	596
BCL2	Ruxolitinib	-0.0752699	0.0999175	596
BCL2	S-Trityl-L-cysteine	-0.107734	0.147428	596
BCL2	SB 216763	0.130874	0.00389738	596
BCL2	SB 505124	0.0663167	0.316943	596
BCL2	SB52334	-0.0910681	0.0286538	596
BCL2	SB590885	0.0483672	0.332201	596
BCL2	SGC0946	0.125225	0.00423918	596
BCL2	SL 0101-1	0.0522017	0.486275	596
BCL2	SN-38	-0.0578182	0.180862	596
BCL2	SNX-2112	-0.317956	2.24305e-21	596
BCL2	STF-62247	-0.195037	1.06091e-07	596
BCL2	Salubrinal	-0.109418	0.161798	596
BCL2	Saracatinib	0.106216	0.176049	596
BCL2	Shikonin	-0.0945314	0.0420155	596
BCL2	Sorafenib	-0.121293	0.154847	596
BCL2	Sunitinib	-0.13449	0.0415771	596
BCL2	T0901317	-0.169329	4.51937e-06	596
BCL2	TAE684	0.142622	0.0812657	596
BCL2	TAK-715	-0.266493	5.86674e-15	596
BCL2	TG101348	-0.386418	1.05458e-32	596
BCL2	TGX221	0.175299	0.00319297	596
BCL2	THZ-2-102-1	-0.355313	1.03754e-26	596
BCL2	THZ-2-49	-0.292803	8.48477e-18	596
BCL2	TL-1-85	-0.363629	1.31056e-28	596
BCL2	TL-2-105	-0.255549	1.28117e-13	596
BCL2	TPCA-1	-0.407373	1.13123e-36	596
BCL2	TW 37	0.0361963	0.457825	596
BCL2	Talazoparib	0.0235335	0.639389	596
BCL2	Tamoxifen	-0.0239803	0.859893	596
BCL2	Temozolomide	-0.0545404	0.406158	596
BCL2	Temsirolimus	-0.00180968	0.980326	596
BCL2	Thapsigargin	0.0812014	0.125974	596
BCL2	Tipifarnib	0.0444283	0.497312	596
BCL2	Tivozanib	-0.0806859	0.0975641	596
BCL2	Trametinib	0.241779	3.02789e-12	596
BCL2	Tubastatin A	-0.342729	2.92431e-25	596
BCL2	UNC0638	-0.30014	3.48971e-20	596
BCL2	UNC1215	0.0753725	0.105505	596
BCL2	VNLG/124	-0.265051	2.54244e-14	596
BCL2	VX-11e	-0.0554666	0.231756	596
BCL2	VX-680	-0.0716399	0.434814	596
BCL2	VX-702	-0.0655694	0.676357	596
BCL2	Veliparib	0.0605727	0.346945	596
BCL2	Vinblastine	-0.0362268	0.43861	596
BCL2	Vinorelbine	0.00319792	0.966565	596
BCL2	Vorinostat	-0.320353	1.88111e-20	596
BCL2	WH-4-023	0.138644	0.0418126	596
BCL2	WZ-1-84	0.117855	0.0975801	596
BCL2	WZ3105	-0.303225	1.01869e-19	596
BCL2	XAV939	0.193419	1.01506e-07	596
BCL2	XL-184	-0.187052	6.25982e-07	596
BCL2	XMD11-85h	-0.0505326	0.772258	596
BCL2	XMD13-2	-0.315793	2.39232e-21	596
BCL2	XMD14-99	-0.260624	5.58633e-14	596
BCL2	XMD15-27	-0.136302	0.000706865	596
BCL2	XMD8-85	-0.0632905	0.449854	596
BCL2	XMD8-92	-0.0444572	0.693012	596
BCL2	Y-39983	-0.246403	1.08396e-12	596
BCL2	YK 4-279	0.0748576	0.127601	596
BCL2	YM155	-0.0739455	0.115185	596
BCL2	YM201636	-0.286017	4.22459e-17	596
BCL2	Z-LLNle-CHO	-0.0363617	0.661474	596
BCL2	ZG-10	-0.0889257	0.155855	596
BCL2	ZM-447439	-0.070612	0.111809	596
BCL2	ZSTK474	-0.319387	1.08058e-21	596
BCL2	Zibotentan	0.0424502	0.854133	596
BCL2	piperlongumine	0.119361	0.00224975	596
BCL2	rTRAIL	0.070701	0.275955	596
BCL2	selumetinib	0.156371	7.52189e-06	596
BCL2L11	(5Z)-7-Oxozeaenol	0.116552	0.00202622	10018
BCL2L11	17-AAG	0.19622	4.39662e-08	10018
BCL2L11	5-Fluorouracil	-0.112375	0.00173595	10018
BCL2L11	681640	0.0454398	0.454896	10018
BCL2L11	A-443654	-0.0766812	0.618719	10018
BCL2L11	A-770041	-0.111164	0.124727	10018
BCL2L11	AC220	-0.0189602	0.739391	10018
BCL2L11	AG-014699	0.159954	4.853e-05	10018
BCL2L11	AICAR	-0.238542	7.11242e-11	10018
BCL2L11	AKT inhibitor VIII	0.0863396	0.042885	10018
BCL2L11	AMG-706	0.0975939	0.0498957	10018
BCL2L11	AP-24534	-0.16158	1.6139e-05	10018
BCL2L11	AR-42	-0.208661	1.39684e-09	10018
BCL2L11	AS601245	0.0578921	0.264328	10018
BCL2L11	AS605240	-0.076685	0.0610507	10018
BCL2L11	AT-7519	-0.235626	4.56692e-12	10018
BCL2L11	ATRA	-0.0728093	0.111489	10018
BCL2L11	AUY922	-0.0312998	0.584442	10018
BCL2L11	AZ628	0.0532426	0.505535	10018
BCL2L11	AZD6482	0.041559	0.383886	10018
BCL2L11	AZD7762	-0.125466	0.00105018	10018
BCL2L11	AZD8055	-0.153164	4.7573e-05	10018
BCL2L11	Afatinib	0.0528431	0.163094	10018
BCL2L11	Axitinib	0.0333517	0.555392	10018
BCL2L11	BAY 61-3606	-0.0981215	0.01259	10018
BCL2L11	BEZ235	0.0424596	0.397092	10018
BCL2L11	BHG712	-0.25305	1.06631e-13	10018
BCL2L11	BI-2536	-0.0341294	0.778304	10018
BCL2L11	BIRB 0796	0.0540675	0.286729	10018
BCL2L11	BIX02189	-0.168321	1.53888e-06	10018
BCL2L11	BMS-509744	0.0761975	0.395133	10018
BCL2L11	BMS-536924	-0.020256	0.808067	10018
BCL2L11	BMS-708163	0.108925	0.00479632	10018
BCL2L11	BMS-754807	0.0676758	0.185087	10018
BCL2L11	BMS345541	-0.197731	9.58495e-09	10018
BCL2L11	BX-795	0.046107	0.322502	10018
BCL2L11	BX-912	-0.140896	5.1439e-05	10018
BCL2L11	Belinostat	-0.194041	4.11245e-08	10018
BCL2L11	Bexarotene	0.0679217	0.266731	10018
BCL2L11	Bicalutamide	0.0718742	0.0924225	10018
BCL2L11	Bleomycin	0.0658016	0.199207	10018
BCL2L11	Bleomycin (50 uM)	0.238384	4.37103e-12	10018
BCL2L11	Bortezomib	-0.00397483	0.97205	10018
BCL2L11	Bosutinib	-0.0321359	0.578133	10018
BCL2L11	Bryostatin 1	0.0777967	0.103005	10018
BCL2L11	CAL-101	-0.0705225	0.0614463	10018
BCL2L11	CAY10603	-0.200668	5.73205e-09	10018
BCL2L11	CCT007093	0.051887	0.23579	10018
BCL2L11	CCT018159	0.0538444	0.27976	10018
BCL2L11	CEP-701	-0.0635317	0.119083	10018
BCL2L11	CGP-082996	-0.0209322	0.865689	10018
BCL2L11	CGP-60474	-0.0280464	0.781151	10018
BCL2L11	CH5424802	0.0437497	0.452162	10018
BCL2L11	CHIR-99021	0.113364	0.00188854	10018
BCL2L11	CI-1040	0.0803762	0.0545191	10018
BCL2L11	CMK	-0.0913145	0.376531	10018
BCL2L11	CP466722	-0.129815	0.000217428	10018
BCL2L11	CP724714	-0.0126592	0.854642	10018
BCL2L11	CUDC-101	-0.208658	2.29937e-09	10018
BCL2L11	CX-5461	-0.0853076	0.0194947	10018
BCL2L11	Camptothecin	0.0386345	0.405839	10018
BCL2L11	Cetuximab	0.091527	0.020193	10018
BCL2L11	Cisplatin	0.173188	2.6227e-05	10018
BCL2L11	Crizotinib	0.0431112	0.786636	10018
BCL2L11	Cyclopamine	-0.0390675	0.750065	10018
BCL2L11	Cytarabine	0.0135783	0.824688	10018
BCL2L11	DMOG	-0.139993	0.000370258	10018
BCL2L11	Dabrafenib	0.0979079	0.0144979	10018
BCL2L11	Dasatinib	-0.0056574	0.944181	10018
BCL2L11	Docetaxel	0.181636	5.89388e-07	10018
BCL2L11	Doxorubicin	0.0270626	0.703563	10018
BCL2L11	EHT 1864	0.0404831	0.544742	10018
BCL2L11	EKB-569	-0.101901	0.00756578	10018
BCL2L11	EX-527	0.0319016	0.782887	10018
BCL2L11	Elesclomol	0.118988	0.00356918	10018
BCL2L11	Embelin	0.0673044	0.203556	10018
BCL2L11	Epothilone B	0.0280685	0.613796	10018
BCL2L11	Erlotinib	0.0819217	0.261057	10018
BCL2L11	Etoposide	0.0177583	0.754263	10018
BCL2L11	FH535	0.0538356	0.2547	10018
BCL2L11	FK866	-0.123086	0.000540247	10018
BCL2L11	FMK	-0.0294694	0.692646	10018
BCL2L11	FR-180204	-0.0268595	0.644674	10018
BCL2L11	FTI-277	0.176875	3.9987e-06	10018
BCL2L11	Foretinib	-0.0648806	0.109786	10018
BCL2L11	GDC0449	0.00501104	0.97435	10018
BCL2L11	GDC0941	-0.0357859	0.546884	10018
BCL2L11	GNF-2	0.0206057	0.943849	10018
BCL2L11	GSK-650394	-0.0192341	0.831613	10018
BCL2L11	GSK1070916	-0.0483085	0.20555	10018
BCL2L11	GSK1904529A	0.0853647	0.0486956	10018
BCL2L11	GSK2126458	-0.167565	2.31858e-06	10018
BCL2L11	GSK269962A	0.083436	0.059855	10018
BCL2L11	GSK429286A	-0.0109065	0.824583	10018
BCL2L11	GSK690693	-0.19244	3.30183e-08	10018
BCL2L11	GW 441756	0.00595061	0.990981	10018
BCL2L11	GW-2580	-0.0417281	0.903239	10018
BCL2L11	GW843682X	-0.0753834	0.379495	10018
BCL2L11	Gefitinib	0.0569023	0.172359	10018
BCL2L11	Gemcitabine	-0.00429884	0.946552	10018
BCL2L11	Genentech Cpd 10	-0.0787107	0.0323807	10018
BCL2L11	HG-5-113-01	0.00394402	0.968772	10018
BCL2L11	HG-5-88-01	-0.00149305	0.995636	10018
BCL2L11	HG-6-64-1	-0.0488112	0.310515	10018
BCL2L11	I-BET-762	-0.308319	1.29702e-20	10018
BCL2L11	IOX2	0.0168633	0.812004	10018
BCL2L11	IPA-3	-0.151493	4.6442e-05	10018
BCL2L11	Imatinib	-0.0464833	0.780956	10018
BCL2L11	Ispinesib Mesylate	-0.13494	0.000140869	10018
BCL2L11	JNJ-26854165	0.0821234	0.0715756	10018
BCL2L11	JNK Inhibitor VIII	0.124591	0.00178589	10018
BCL2L11	JNK-9L	-0.0393131	0.501432	10018
BCL2L11	JQ1	-0.107776	0.00631036	10018
BCL2L11	JQ12	-0.0631064	0.220974	10018
BCL2L11	JW-7-24-1	-0.211724	6.17959e-10	10018
BCL2L11	JW-7-52-1	-0.0852435	0.349655	10018
BCL2L11	KIN001-055	0.0270873	0.708283	10018
BCL2L11	KIN001-102	-0.169422	9.27475e-07	10018
BCL2L11	KIN001-135	0.0824773	0.388902	10018
BCL2L11	KIN001-236	-0.1927	3.57114e-08	10018
BCL2L11	KIN001-244	-0.148773	2.6746e-05	10018
BCL2L11	KIN001-260	-0.224145	7.1806e-11	10018
BCL2L11	KIN001-266	-0.081919	0.0651069	10018
BCL2L11	KIN001-270	-0.124609	0.000814435	10018
BCL2L11	KU-55933	-0.0125722	0.876416	10018
BCL2L11	LAQ824	-0.173517	2.50384e-06	10018
BCL2L11	LFM-A13	0.109707	0.0151525	10018
BCL2L11	LY317615	-0.0796621	0.0546595	10018
BCL2L11	Lapatinib	0.102745	0.100477	10018
BCL2L11	Lenalidomide	-0.0889992	0.123349	10018
BCL2L11	Linifanib	-0.0166319	0.792945	10018
BCL2L11	Lisitinib	0.0202898	0.791669	10018
BCL2L11	MG-132	0.023113	0.839097	10018
BCL2L11	MK-2206	-0.0868138	0.066961	10018
BCL2L11	MLN4924	0.117572	0.019414	10018
BCL2L11	MP470	-0.141495	0.000692413	10018
BCL2L11	MPS-1-IN-1	-0.0443898	0.256707	10018
BCL2L11	MS-275	-0.126603	0.0793977	10018
BCL2L11	Masitinib	-0.148387	3.4184e-05	10018
BCL2L11	Methotrexate	-0.231317	6.03484e-11	10018
BCL2L11	Midostaurin	0.116309	0.00423584	10018
BCL2L11	Mitomycin C	0.0239294	0.680766	10018
BCL2L11	NG-25	-0.253413	7.95148e-14	10018
BCL2L11	NPK76-II-72-1	-0.222991	4.12908e-11	10018
BCL2L11	NSC-207895	-0.0315225	0.516183	10018
BCL2L11	NSC-87877	0.0630807	0.23636	10018
BCL2L11	NU-7441	0.0203773	0.820661	10018
BCL2L11	Navitoclax	-0.14701	5.1125e-05	10018
BCL2L11	Nilotinib	-0.0816932	0.0774791	10018
BCL2L11	Nutlin-3a (-)	0.0970719	0.0240005	10018
BCL2L11	OSI-027	-0.195907	1.63981e-08	10018
BCL2L11	OSI-930	-0.132692	0.000301407	10018
BCL2L11	OSU-03012	-0.0764728	0.0948555	10018
BCL2L11	Obatoclax Mesylate	-0.084867	0.051733	10018
BCL2L11	Olaparib	0.147568	0.000172852	10018
BCL2L11	PAC-1	-0.118102	0.00262026	10018
BCL2L11	PD-0325901	0.137839	0.000277467	10018
BCL2L11	PD-0332991	0.0792627	0.105235	10018
BCL2L11	PD-173074	0.0528748	0.696453	10018
BCL2L11	PF-4708671	0.0214064	0.87111	10018
BCL2L11	PF-562271	0.0744672	0.149067	10018
BCL2L11	PFI-1	-0.0903983	0.0372353	10018
BCL2L11	PHA-665752	0.130922	0.229267	10018
BCL2L11	PHA-793887	-0.287162	7.1473e-18	10018
BCL2L11	PI-103	-0.208761	1.53501e-09	10018
BCL2L11	PIK-93	-0.228136	1.69021e-11	10018
BCL2L11	PLX4720	0.118518	0.0016729	10018
BCL2L11	Paclitaxel	-0.040699	0.73941	10018
BCL2L11	Parthenolide	-0.0977046	0.297676	10018
BCL2L11	Pazopanib	0.0783468	0.114604	10018
BCL2L11	Phenformin	-0.249275	7.82768e-13	10018
BCL2L11	Pyrimethamine	-0.0630093	0.586338	10018
BCL2L11	QL-VIII-58	0.0517704	0.513998	10018
BCL2L11	QL-X-138	-0.191446	4.08059e-08	10018
BCL2L11	QL-XI-92	-0.21139	8.22843e-10	10018
BCL2L11	QL-XII-47	-0.106134	0.00522262	10018
BCL2L11	QL-XII-61	-0.228362	2.2709e-05	10018
BCL2L11	QS11	-0.066089	0.244442	10018
BCL2L11	RDEA119	0.148048	2.2317e-05	10018
BCL2L11	RO-3306	0.114257	0.00463375	10018
BCL2L11	Rapamycin	-0.142003	0.121886	10018
BCL2L11	Roscovitine	-0.0192553	0.929463	10018
BCL2L11	Ruxolitinib	-0.130435	0.00150257	10018
BCL2L11	S-Trityl-L-cysteine	-0.107467	0.14845	10018
BCL2L11	SB 216763	0.107907	0.0193176	10018
BCL2L11	SB 505124	0.0152841	0.876411	10018
BCL2L11	SB52334	0.00985514	0.873839	10018
BCL2L11	SB590885	0.0923301	0.0411726	10018
BCL2L11	SGC0946	0.113964	0.00968776	10018
BCL2L11	SL 0101-1	0.0669542	0.358182	10018
BCL2L11	SN-38	0.0778176	0.0590096	10018
BCL2L11	SNX-2112	-0.224366	6.86672e-11	10018
BCL2L11	STF-62247	-0.106741	0.0056455	10018
BCL2L11	Salubrinal	-0.121889	0.112125	10018
BCL2L11	Saracatinib	-0.0165055	0.867505	10018
BCL2L11	Shikonin	-0.0925026	0.0472886	10018
BCL2L11	Sorafenib	-0.00859485	0.953406	10018
BCL2L11	Sunitinib	-0.0646774	0.395799	10018
BCL2L11	T0901317	-0.205364	1.5762e-08	10018
BCL2L11	TAE684	0.127659	0.13586	10018
BCL2L11	TAK-715	-0.171051	9.73358e-07	10018
BCL2L11	TG101348	-0.196357	1.07223e-08	10018
BCL2L11	TGX221	0.116854	0.0606096	10018
BCL2L11	THZ-2-102-1	-0.213633	6.45106e-10	10018
BCL2L11	THZ-2-49	-0.223365	1.51319e-10	10018
BCL2L11	TL-1-85	-0.233789	7.50101e-12	10018
BCL2L11	TL-2-105	-0.139496	9.7481e-05	10018
BCL2L11	TPCA-1	-0.225201	3.19058e-11	10018
BCL2L11	TW 37	0.0289286	0.569628	10018
BCL2L11	Talazoparib	0.164902	1.7323e-05	10018
BCL2L11	Tamoxifen	-0.0177983	0.905597	10018
BCL2L11	Temozolomide	0.053365	0.420877	10018
BCL2L11	Temsirolimus	-0.0271864	0.621092	10018
BCL2L11	Thapsigargin	-0.0446245	0.485736	10018
BCL2L11	Tipifarnib	-0.00867466	0.923864	10018
BCL2L11	Tivozanib	-0.0346818	0.571549	10018
BCL2L11	Trametinib	0.160306	6.26087e-06	10018
BCL2L11	Tubastatin A	-0.174734	4.41642e-07	10018
BCL2L11	UNC0638	-0.183538	5.57984e-08	10018
BCL2L11	UNC1215	0.105824	0.0176841	10018
BCL2L11	VNLG/124	-0.0484853	0.249828	10018
BCL2L11	VX-11e	-0.0626139	0.168424	10018
BCL2L11	VX-680	0.00159226	0.992453	10018
BCL2L11	VX-702	-0.0191388	0.94041	10018
BCL2L11	Veliparib	0.129228	0.0327159	10018
BCL2L11	Vinblastine	-0.0515918	0.245955	10018
BCL2L11	Vinorelbine	-0.0319309	0.590956	10018
BCL2L11	Vorinostat	-0.201843	1.43404e-08	10018
BCL2L11	WH-4-023	0.0136305	0.886823	10018
BCL2L11	WZ-1-84	0.0654722	0.408423	10018
BCL2L11	WZ3105	-0.226086	3.15356e-11	10018
BCL2L11	XAV939	0.102446	0.0068019	10018
BCL2L11	XL-184	-0.0731124	0.0937703	10018
BCL2L11	XMD11-85h	-0.0737572	0.631988	10018
BCL2L11	XMD13-2	-0.203863	2.9413e-09	10018
BCL2L11	XMD14-99	-0.025246	0.543899	10018
BCL2L11	XMD15-27	-0.0267731	0.607613	10018
BCL2L11	XMD8-85	-0.0827658	0.293457	10018
BCL2L11	XMD8-92	-0.117761	0.161236	10018
BCL2L11	Y-39983	-0.135824	0.000150527	10018
BCL2L11	YK 4-279	0.0757964	0.121981	10018
BCL2L11	YM155	-0.0978563	0.028166	10018
BCL2L11	YM201636	-0.156931	8.48268e-06	10018
BCL2L11	Z-LLNle-CHO	-0.070218	0.343787	10018
BCL2L11	ZG-10	-0.0631225	0.342201	10018
BCL2L11	ZM-447439	0.0135594	0.807919	10018
BCL2L11	ZSTK474	-0.175408	5.11164e-07	10018
BCL2L11	Zibotentan	0.0531147	0.787224	10018
BCL2L11	piperlongumine	0.0723045	0.0823318	10018
BCL2L11	rTRAIL	0.0218586	0.796272	10018
BCL2L11	selumetinib	0.14222	5.1893e-05	10018
BNIP3	(5Z)-7-Oxozeaenol	0.0420892	0.329458	664
BNIP3	17-AAG	0.0447158	0.247781	664
BNIP3	5-Fluorouracil	-0.0853199	0.0191073	664
BNIP3	681640	0.0193144	0.778582	664
BNIP3	A-443654	-0.048085	0.792251	664
BNIP3	A-770041	-0.0490347	0.571039	664
BNIP3	AC220	0.030695	0.555784	664
BNIP3	AG-014699	0.0129898	0.79519	664
BNIP3	AICAR	-0.0914539	0.0190936	664
BNIP3	AKT inhibitor VIII	0.00616702	0.913399	664
BNIP3	AMG-706	-0.00761733	0.927464	664
BNIP3	AP-24534	-0.0741599	0.0662584	664
BNIP3	AR-42	-0.0407656	0.276422	664
BNIP3	AS601245	-0.0417433	0.448301	664
BNIP3	AS605240	-0.00497836	0.927514	664
BNIP3	AT-7519	-0.0675152	0.0626389	664
BNIP3	ATRA	-0.0259836	0.635877	664
BNIP3	AUY922	-0.050716	0.322323	664
BNIP3	AZ628	0.067905	0.36912	664
BNIP3	AZD6482	-0.0819382	0.0497072	664
BNIP3	AZD7762	-0.0504811	0.223585	664
BNIP3	AZD8055	-0.13121	0.000549538	664
BNIP3	Afatinib	0.0189724	0.645226	664
BNIP3	Axitinib	-0.0637277	0.197546	664
BNIP3	BAY 61-3606	-0.0603548	0.141631	664
BNIP3	BEZ235	0.00375575	0.951857	664
BNIP3	BHG712	-0.0770589	0.0343576	664
BNIP3	BI-2536	-0.0341977	0.77776	664
BNIP3	BIRB 0796	0.00516211	0.935053	664
BNIP3	BIX02189	-0.116453	0.00111482	664
BNIP3	BMS-509744	0.0565033	0.551079	664
BNIP3	BMS-536924	0.00933338	0.923999	664
BNIP3	BMS-708163	-0.0092213	0.844465	664
BNIP3	BMS-754807	0.00507756	0.945272	664
BNIP3	BMS345541	-0.0802904	0.0260961	664
BNIP3	BX-795	-0.0567687	0.208456	664
BNIP3	BX-912	-0.0632658	0.0807299	664
BNIP3	Belinostat	-0.0168996	0.681768	664
BNIP3	Bexarotene	-0.0182429	0.845837	664
BNIP3	Bicalutamide	-0.0313917	0.510023	664
BNIP3	Bleomycin	0.00149997	0.985428	664
BNIP3	Bleomycin (50 uM)	0.0326944	0.394243	664
BNIP3	Bortezomib	0.00723552	0.947533	664
BNIP3	Bosutinib	-0.0169697	0.795124	664
BNIP3	Bryostatin 1	-0.00464312	0.947719	664
BNIP3	CAL-101	-0.114721	0.00162443	664
BNIP3	CAY10603	-0.0577319	0.1153	664
BNIP3	CCT007093	0.027668	0.561549	664
BNIP3	CCT018159	0.0338098	0.535467	664
BNIP3	CEP-701	-0.0189051	0.68058	664
BNIP3	CGP-082996	-0.0719339	0.430654	664
BNIP3	CGP-60474	-0.0403197	0.674539	664
BNIP3	CH5424802	-0.0131287	0.863908	664
BNIP3	CHIR-99021	-0.0348742	0.388234	664
BNIP3	CI-1040	0.015319	0.765902	664
BNIP3	CMK	-0.0699968	0.53091	664
BNIP3	CP466722	-0.0810218	0.0243386	664
BNIP3	CP724714	0.00807369	0.912173	664
BNIP3	CUDC-101	-0.054771	0.146224	664
BNIP3	CX-5461	-0.0724349	0.0495451	664
BNIP3	Camptothecin	0.0114257	0.834602	664
BNIP3	Cetuximab	0.0135035	0.771559	664
BNIP3	Cisplatin	0.0169853	0.773359	664
BNIP3	Crizotinib	-0.0792803	0.522453	664
BNIP3	Cyclopamine	-0.0352331	0.776006	664
BNIP3	Cytarabine	-0.0634094	0.189048	664
BNIP3	DMOG	-0.024445	0.630491	664
BNIP3	Dabrafenib	0.0687289	0.101066	664
BNIP3	Dasatinib	-0.0710383	0.296441	664
BNIP3	Docetaxel	0.0549725	0.151774	664
BNIP3	Doxorubicin	-0.00974429	0.907869	664
BNIP3	EHT 1864	-0.00663144	0.944599	664
BNIP3	EKB-569	-0.0586692	0.144607	664
BNIP3	EX-527	-0.00535082	0.970278	664
BNIP3	Elesclomol	0.0285361	0.555416	664
BNIP3	Embelin	0.0106771	0.894128	664
BNIP3	Epothilone B	-0.0132873	0.830341	664
BNIP3	Erlotinib	0.0591338	0.427971	664
BNIP3	Etoposide	-0.00577146	0.929144	664
BNIP3	FH535	0.0228683	0.680466	664
BNIP3	FK866	-0.0383628	0.315446	664
BNIP3	FMK	-0.0121993	0.887868	664
BNIP3	FR-180204	-0.00446482	0.954347	664
BNIP3	FTI-277	-0.0074878	0.877754	664
BNIP3	Foretinib	-0.0544066	0.189451	664
BNIP3	GDC0449	0.0223927	0.849314	664
BNIP3	GDC0941	-0.0878684	0.0621031	664
BNIP3	GNF-2	-0.0447723	0.859329	664
BNIP3	GSK-650394	0.000339545	0.996951	664
BNIP3	GSK1070916	-0.0477153	0.211638	664
BNIP3	GSK1904529A	0.00247923	0.966701	664
BNIP3	GSK2126458	-0.0475989	0.219122	664
BNIP3	GSK269962A	-0.0245836	0.67992	664
BNIP3	GSK429286A	-0.0482309	0.253544	664
BNIP3	GSK690693	-0.0955577	0.00865271	664
BNIP3	GW 441756	0.0368067	0.855729	664
BNIP3	GW-2580	-0.0421531	0.903239	664
BNIP3	GW843682X	-0.0447614	0.646621	664
BNIP3	Gefitinib	0.0479276	0.256888	664
BNIP3	Gemcitabine	-0.00514895	0.935172	664
BNIP3	Genentech Cpd 10	-0.0703836	0.0579846	664
BNIP3	HG-5-113-01	-0.0738764	0.28035	664
BNIP3	HG-5-88-01	-0.0605155	0.656573	664
BNIP3	HG-6-64-1	-0.0461248	0.342709	664
BNIP3	I-BET-762	-0.0948265	0.00681048	664
BNIP3	IOX2	0.0617948	0.259914	664
BNIP3	IPA-3	-0.150613	5.1651e-05	664
BNIP3	Imatinib	-0.0707476	0.6109	664
BNIP3	Ispinesib Mesylate	-0.0617008	0.0980484	664
BNIP3	JNJ-26854165	0.00373738	0.959794	664
BNIP3	JNK Inhibitor VIII	0.0525862	0.222283	664
BNIP3	JNK-9L	0.0150031	0.831874	664
BNIP3	JQ1	-0.0773967	0.0589929	664
BNIP3	JQ12	-0.0946789	0.0495447	664
BNIP3	JW-7-24-1	-0.0730805	0.0431166	664
BNIP3	JW-7-52-1	-0.0395748	0.722746	664
BNIP3	KIN001-055	-0.0205159	0.792259	664
BNIP3	KIN001-102	-0.0918546	0.00959499	664
BNIP3	KIN001-135	0.047184	0.669411	664
BNIP3	KIN001-236	-0.0510908	0.180652	664
BNIP3	KIN001-244	-0.102275	0.00466785	664
BNIP3	KIN001-260	-0.0836179	0.0208995	664
BNIP3	KIN001-266	-0.055275	0.237481	664
BNIP3	KIN001-270	-0.07732	0.0453269	664
BNIP3	KU-55933	-0.0193497	0.796195	664
BNIP3	LAQ824	-0.0948148	0.0137918	664
BNIP3	LFM-A13	-0.0287514	0.606253	664
BNIP3	LY317615	-0.0688143	0.104184	664
BNIP3	Lapatinib	0.0516294	0.43364	664
BNIP3	Lenalidomide	-0.0147715	0.8844	664
BNIP3	Linifanib	-0.00156866	0.983783	664
BNIP3	Lisitinib	-0.000332806	0.99739	664
BNIP3	MG-132	0.0147715	0.90252	664
BNIP3	MK-2206	-0.064674	0.191226	664
BNIP3	MLN4924	0.0529917	0.344177	664
BNIP3	MP470	-0.00617481	0.907466	664
BNIP3	MPS-1-IN-1	-0.00712072	0.874273	664
BNIP3	MS-275	-0.0992195	0.188506	664
BNIP3	Masitinib	-0.0875597	0.0180261	664
BNIP3	Methotrexate	-0.106451	0.00375937	664
BNIP3	Midostaurin	-0.00468713	0.931871	664
BNIP3	Mitomycin C	0.00342653	0.961654	664
BNIP3	NG-25	-0.103593	0.00361808	664
BNIP3	NPK76-II-72-1	-0.0750056	0.0350971	664
BNIP3	NSC-207895	-0.022452	0.658801	664
BNIP3	NSC-87877	-0.0395783	0.492166	664
BNIP3	NU-7441	-0.0462842	0.516497	664
BNIP3	Navitoclax	-0.0752187	0.0453125	664
BNIP3	Nilotinib	-0.0705286	0.140056	664
BNIP3	Nutlin-3a (-)	-0.0347908	0.495602	664
BNIP3	OSI-027	-0.0613061	0.0961282	664
BNIP3	OSI-930	-0.0479618	0.228625	664
BNIP3	OSU-03012	-0.0349942	0.506484	664
BNIP3	Obatoclax Mesylate	-0.0551913	0.237792	664
BNIP3	Olaparib	0.0392703	0.383993	664
BNIP3	PAC-1	-0.097142	0.0150277	664
BNIP3	PD-0325901	0.0364587	0.389742	664
BNIP3	PD-0332991	-0.0495434	0.366081	664
BNIP3	PD-173074	-0.0231172	0.900434	664
BNIP3	PF-4708671	0.0231068	0.856279	664
BNIP3	PF-562271	0.0254843	0.68316	664
BNIP3	PFI-1	-0.00875194	0.887038	664
BNIP3	PHA-665752	-0.0101575	0.957091	664
BNIP3	PHA-793887	-0.0486473	0.181892	664
BNIP3	PI-103	-0.0613715	0.095465	664
BNIP3	PIK-93	-0.0950758	0.00713083	664
BNIP3	PLX4720	0.0766782	0.0551727	664
BNIP3	Paclitaxel	-0.0370454	0.765605	664
BNIP3	Parthenolide	-0.149493	0.0990292	664
BNIP3	Pazopanib	-0.030134	0.614134	664
BNIP3	Phenformin	-0.0377629	0.334208	664
BNIP3	Pyrimethamine	-0.0504885	0.672854	664
BNIP3	QL-VIII-58	0.0152965	0.880435	664
BNIP3	QL-X-138	-0.0345174	0.375347	664
BNIP3	QL-XI-92	-0.110397	0.0019448	664
BNIP3	QL-XII-47	-0.059433	0.137478	664
BNIP3	QL-XII-61	0.010123	0.909517	664
BNIP3	QS11	-0.0209661	0.776884	664
BNIP3	RDEA119	0.0230884	0.571173	664
BNIP3	RO-3306	0.0348656	0.427443	664
BNIP3	Rapamycin	-0.0634713	0.588274	664
BNIP3	Roscovitine	-0.0212684	0.919361	664
BNIP3	Ruxolitinib	-0.033383	0.541931	664
BNIP3	S-Trityl-L-cysteine	-0.102826	0.170388	664
BNIP3	SB 216763	-0.018187	0.74413	664
BNIP3	SB 505124	-0.00324624	0.97849	664
BNIP3	SB52334	-0.00349596	0.957602	664
BNIP3	SB590885	0.0640094	0.182834	664
BNIP3	SGC0946	0.0168812	0.794108	664
BNIP3	SL 0101-1	-0.00285581	0.980828	664
BNIP3	SN-38	-0.00279296	0.961165	664
BNIP3	SNX-2112	-0.0715697	0.0516854	664
BNIP3	STF-62247	-0.0899366	0.0211663	664
BNIP3	Salubrinal	-0.0235824	0.815878	664
BNIP3	Saracatinib	-0.0214308	0.825341	664
BNIP3	Shikonin	-0.0245434	0.682401	664
BNIP3	Sorafenib	-0.0291702	0.822172	664
BNIP3	Sunitinib	-0.0397295	0.632954	664
BNIP3	T0901317	-0.0508811	0.220836	664
BNIP3	TAE684	0.00713335	0.966886	664
BNIP3	TAK-715	-0.0725951	0.0470605	664
BNIP3	TG101348	-0.0677171	0.0624217	664
BNIP3	TGX221	-0.0466133	0.496154	664
BNIP3	THZ-2-102-1	-0.045644	0.225709	664
BNIP3	THZ-2-49	-0.0978533	0.0072123	664
BNIP3	TL-1-85	-0.102948	0.00400758	664
BNIP3	TL-2-105	-0.0800985	0.0304755	664
BNIP3	TPCA-1	-0.103397	0.00333738	664
BNIP3	TW 37	0.0828993	0.0482991	664
BNIP3	Talazoparib	0.0499162	0.270806	664
BNIP3	Tamoxifen	-0.0800148	0.368334	664
BNIP3	Temozolomide	-0.00820198	0.9344	664
BNIP3	Temsirolimus	-0.0209326	0.71533	664
BNIP3	Thapsigargin	-0.0202624	0.797398	664
BNIP3	Tipifarnib	-0.0712799	0.211177	664
BNIP3	Tivozanib	-0.0464467	0.41586	664
BNIP3	Trametinib	0.0401063	0.306873	664
BNIP3	Tubastatin A	-0.0737551	0.040841	664
BNIP3	UNC0638	-0.0646137	0.0708097	664
BNIP3	UNC1215	-0.0248639	0.661497	664
BNIP3	VNLG/124	-0.0488961	0.245206	664
BNIP3	VX-11e	0.00925555	0.881571	664
BNIP3	VX-680	-0.0388971	0.710908	664
BNIP3	VX-702	-0.0385848	0.859636	664
BNIP3	Veliparib	0.0336669	0.638235	664
BNIP3	Vinblastine	-0.0409975	0.37271	664
BNIP3	Vinorelbine	-0.033217	0.571637	664
BNIP3	Vorinostat	-0.0567051	0.131322	664
BNIP3	WH-4-023	-0.0572796	0.475736	664
BNIP3	WZ-1-84	0.0211282	0.817446	664
BNIP3	WZ3105	-0.0527539	0.151056	664
BNIP3	XAV939	0.0231903	0.585636	664
BNIP3	XL-184	-0.0548475	0.231638	664
BNIP3	XMD11-85h	0.0108216	0.965742	664
BNIP3	XMD13-2	-0.0652435	0.0736865	664
BNIP3	XMD14-99	-0.0656339	0.0849538	664
BNIP3	XMD15-27	-0.0811526	0.0620672	664
BNIP3	XMD8-85	-0.0660857	0.426111	664
BNIP3	XMD8-92	0.00195791	0.989676	664
BNIP3	Y-39983	-0.0782536	0.0355963	664
BNIP3	YK 4-279	0.0121019	0.860999	664
[truncated: 14,066 more rows]
